# Supplementary material for: One step carboxyl group isotopic labeling for quantitative analysis of intact N-glycopeptides by mass spectrometry
Source: Royal Society of Chemistry journal article supplement (doi:10.1039/d1cc00197c), 2021-01-01
Supplement: d1cc00197c2.xlsx [file d1cc00197c2.xlsx]

## Sheet: TableS3
TableS3 The quantified intact N-glycopeptides from igg
glycopeptide	protein	glycan	ratio1	ratio2	ratio3
EEQFNSTFR	IgG1	HexNAc(3)Hex(5)NeuAc(1)	NA	1.68196	NA
EEQFNSTFR	IgG1	HexNAc(4)Hex(3)Fuc(1)	0.971005	1.21727	1.85382
EEQFNSTFR	IgG1	HexNAc(4)Hex(3)Fuc(1)NeuAc(1)	NA	0.793864	NA
EEQFNSTFR	IgG1	HexNAc(4)Hex(4)	1.23129	1.65428	2.23308
EEQFNSTFR	IgG1	HexNAc(4)Hex(4)Fuc(1)	1.1782	0.97581	3.33574
EEQFNSTFR	IgG1	HexNAc(4)Hex(4)Fuc(1)NeuAc(1)	NA	NA	0.38726
EEQFNSTFR	IgG1	HexNAc(4)Hex(4)Fuc(1)NeuAc(1)	1.16064	0.824742	0.856955
EEQFNSTFR	IgG1	HexNAc(4)Hex(4)NeuAc(2)	NA	1.12508	NA
EEQFNSTFR	IgG1	HexNAc(4)Hex(5)	0.758693	1.28891	NA
EEQFNSTFR	IgG1	HexNAc(4)Hex(5)Fuc(1)	0.979551	1.24381	4.61403
EEQFNSTFR	IgG1	HexNAc(4)Hex(5)Fuc(1)NeuAc(1)	NA	NA	0.925844
EEQFNSTFR	IgG1	HexNAc(4)Hex(5)Fuc(1)NeuAc(1)	0.938859	2.48517	0.947498
EEQFNSTFR	IgG1	HexNAc(4)Hex(5)NeuAc(1)	NA	NA	1.50355
EEQFNSTFR	IgG1	HexNAc(4)Hex(6)	1.05477	1.38201	NA
EEQFNSTFR	IgG1	HexNAc(4)Hex(6)Fuc(1)	NA	1.48179	0.960581
EEQFNSTFR	IgG1	HexNAc(4)Hex(6)NeuAc(1)	NA	NA	2.49583
EEQFNSTFR	IgG1	HexNAc(5)Hex(3)	0.926556	1.26938	0.979713
EEQFNSTFR	IgG1	HexNAc(5)Hex(3)Fuc(1)	1.13039	0.741999	1.91133
EEQFNSTFR	IgG1	HexNAc(5)Hex(4)	1.02706	1.25399	0.712282
EEQFNSTFR	IgG1	HexNAc(5)Hex(4)Fuc(1)	0.87253	1.00229	1.95174
EEQFNSTFR	IgG1	HexNAc(5)Hex(5)	0.824064	1.09526	1.28347
EEQFNSTFR	IgG1	HexNAc(5)Hex(5)Fuc(1)	1.78486	1.01657	2.24046
EEQFNSTFR	IgG1	HexNAc(5)Hex(5)NeuAc(1)	0.96643	NA	NA
EEQFNSTYR	IgG4	HexNAc(2)Hex(8)	NA	1.79608	NA
EEQFNSTYR	IgG4	HexNAc(4)Hex(3)Fuc(1)	NA	1.08769	1.3818
EEQFNSTYR	IgG4	HexNAc(4)Hex(4)	0.834625	NA	NA
EEQFNSTYR	IgG4	HexNAc(4)Hex(4)Fuc(1)	0.844711	0.872604	2.35382
EEQFNSTYR	IgG4	HexNAc(4)Hex(4)Fuc(1)NeuAc(1)	NA	1.04552	1.05254
EEQFNSTYR	IgG4	HexNAc(4)Hex(4)NeuAc(2)	0.891219	NA	NA
EEQFNSTYR	IgG4	HexNAc(4)Hex(5)	NA	1.34067	NA
EEQFNSTYR	IgG4	HexNAc(4)Hex(5)Fuc(1)	2.51657	1.07012	2.98271
EEQFNSTYR	IgG4	HexNAc(4)Hex(5)Fuc(1)NeuAc(1)	0.773921	0.87064	NA
EEQFNSTYR	IgG4	HexNAc(4)Hex(6)NeuAc(1)	NA	0.859103	NA
EEQFNSTYR	IgG4	HexNAc(5)Hex(3)Fuc(1)	1.6126	1.05785	2.069
EEQFNSTYR	IgG4	HexNAc(5)Hex(4)Fuc(1)	1.02982	1.15849	2.49869
EEQFNSTYR	IgG4	HexNAc(5)Hex(5)	1.03319	NA	NA
EEQFNSTYR	IgG4	HexNAc(5)Hex(5)Fuc(1)	0.873252	1.03494	1.03083
EEQYNSTFR	IgG3	HexNAc(2)Hex(3)Fuc(1)	1.5976	NA	NA
EEQYNSTFR	IgG3	HexNAc(4)Hex(3)Fuc(1)	2.1773	1.04463	4.5518
EEQYNSTFR	IgG3	HexNAc(4)Hex(4)Fuc(1)	0.826138	0.849826	2.28983
EEQYNSTFR	IgG3	HexNAc(4)Hex(4)Fuc(1)NeuAc(1)	1.26931	1.03172	1.05254
EEQYNSTFR	IgG3	HexNAc(4)Hex(4)NeuAc(2)	NA	0.999718	NA
EEQYNSTFR	IgG3	HexNAc(4)Hex(5)	1.19086	0.751935	3.50351
EEQYNSTFR	IgG3	HexNAc(4)Hex(5)Fuc(1)	1.4071	1.01663	2.80753
EEQYNSTFR	IgG3	HexNAc(4)Hex(5)Fuc(1)NeuAc(1)	NA	0.885705	0.835143
EEQYNSTFR	IgG3	HexNAc(4)Hex(5)NeuAc(1)	NA	NA	2.78497
EEQYNSTFR	IgG3	HexNAc(4)Hex(6)	0.975941	NA	NA
EEQYNSTFR	IgG3	HexNAc(5)Hex(3)Fuc(1)	1.28268	1.11412	NA
EEQYNSTFR	IgG3	HexNAc(5)Hex(4)Fuc(1)	1.10364	1.31249	2.39835
EEQYNSTFR	IgG3	HexNAc(5)Hex(5)	1.02248	1.48005	1.39359
EEQYNSTFR	IgG3	HexNAc(5)Hex(5)Fuc(1)	1.05766	0.908665	2.02011
EEQYNSTYR	IgG2	HexNAc(2)Hex(8)	1.22084	NA	NA
EEQYNSTYR	IgG2	HexNAc(3)Hex(3)Fuc(1)	NA	0.872396	1.07731
EEQYNSTYR	IgG2	HexNAc(3)Hex(3)Fuc(1)NeuAc(2)	NA	NA	1.71914
EEQYNSTYR	IgG2	HexNAc(3)Hex(3)Fuc(1)NeuAc(2)	1.02142	NA	NA
EEQYNSTYR	IgG2	HexNAc(3)Hex(5)NeuAc(1)	NA	2.80494	NA
EEQYNSTYR	IgG2	HexNAc(4)Hex(3)	1.7424	0.958634	1.94247
EEQYNSTYR	IgG2	HexNAc(4)Hex(3)Fuc(1)	1.13388	0.927661	2.13501
EEQYNSTYR	IgG2	HexNAc(4)Hex(4)	1.05337	1.01818	1.93343
EEQYNSTYR	IgG2	HexNAc(4)Hex(4)Fuc(1)	1.21693	0.884567	3.5567
EEQYNSTYR	IgG2	HexNAc(4)Hex(4)Fuc(1)NeuAc(1)	NA	NA	0.860152
EEQYNSTYR	IgG2	HexNAc(4)Hex(4)Fuc(1)NeuAc(1)	1.02049	0.764875	0.814531
EEQYNSTYR	IgG2	HexNAc(4)Hex(4)NeuAc(1)	NA	NA	0.899106
EEQYNSTYR	IgG2	HexNAc(4)Hex(4)NeuAc(1)	0.702801	0.791875	2.1649
EEQYNSTYR	IgG2	HexNAc(4)Hex(4)NeuAc(2)	NA	NA	1.10937
EEQYNSTYR	IgG2	HexNAc(4)Hex(4)NeuAc(2)	1.20369	1.08302	NA
EEQYNSTYR	IgG2	HexNAc(4)Hex(5)	1.95839	0.871055	1.80461
EEQYNSTYR	IgG2	HexNAc(4)Hex(5)Fuc(1)	2.26366	1.06556	2.37222
EEQYNSTYR	IgG2	HexNAc(4)Hex(5)Fuc(1)NeuAc(1)	NA	NA	0.825257
EEQYNSTYR	IgG2	HexNAc(4)Hex(5)Fuc(1)NeuAc(1)	1.0151	0.780045	0.789638
EEQYNSTYR	IgG2	HexNAc(4)Hex(5)Fuc(1)NeuAc(2)	NA	NA	1.64253
EEQYNSTYR	IgG2	HexNAc(4)Hex(5)NeuAc(1)	NA	NA	0.914231
EEQYNSTYR	IgG2	HexNAc(4)Hex(5)NeuAc(1)	1.89548	0.730424	0.862446
EEQYNSTYR	IgG2	HexNAc(5)Hex(3)	1.04415	0.868814	2.12748
EEQYNSTYR	IgG2	HexNAc(5)Hex(3)Fuc(1)	1.69033	1.59163	1.57108
EEQYNSTYR	IgG2	HexNAc(5)Hex(4)	1.25909	0.973178	0.978668
EEQYNSTYR	IgG2	HexNAc(5)Hex(4)Fuc(1)	NA	0.872505	1.83086
EEQYNSTYR	IgG2	HexNAc(5)Hex(4)Fuc(1)NeuAc(1)	NA	NA	0.801328
EEQYNSTYR	IgG2	HexNAc(5)Hex(4)NeuAc(1)	NA	1.02817	NA
EEQYNSTYR	IgG2	HexNAc(5)Hex(5)	1.17779	1.17481	2.38247
EEQYNSTYR	IgG2	HexNAc(5)Hex(5)Fuc(1)	NA	0.977805	2.14183
EEQYNSTYR	IgG2	HexNAc(5)Hex(5)Fuc(1)NeuAc(1)	NA	NA	0.625696
EEQYNSTYR	IgG2	HexNAc(5)Hex(5)NeuAc(1)	NA	NA	0.956154

## Sheet: TableS4
Table S4 The quantified intact N-glycopeptides and glycoproteins in HepG2 cells
peptide	protein	ratio1	ratio2	ratio3
AAIPSALDTNSSKHexNAc(2)Hex(7)	Q08380	NA	NA	1.11722
AAIPSALDTNSSKHexNAc(2)Hex(8)	Q08380	0.893615	1.43499	1.05738
AAIPSALDTNSSKHexNAc(2)Hex(9)	Q08380	1.05336	0.901899	1.16504
AAIPSALDTNSSKHexNAc(3)Hex(6)NeuAc(1)	Q08380	NA	0.619466	NA
AANGSLRALQATVGNSYKHexNAc(1)	P11279	1	NA	NA
AANGSLRALQATVGNSYKHexNAc(5)Hex(7)Fuc(1)NeuAc(1)	P11279	1	NA	NA
AANGSLRALQATVGNSYKHexNAc(6)Hex(6)NeuAc(2)	P11279	NA	1	NA
AANGSLRHexNAc(2)Hex(10)	P11279	1.49271	NA	NA
AANGSLRHexNAc(2)Hex(2)	P11279	0.64579	NA	NA
AANGSLRHexNAc(2)Hex(7)	P11279	1.14777	1.07527	1.21653
AANGSLRHexNAc(2)Hex(8)	P11279	1	1	1.283
AANGSLRHexNAc(2)Hex(9)	P11279	1.6372	1.51971	1
AANGSLRHexNAc(3)Hex(5)Fuc(1)	P11279	NA	1.57758	NA
AANGSLRHexNAc(3)Hex(5)NeuAc(1)	P11279	NA	NA	4.35246
AANGSLRHexNAc(4)Hex(6)NeuAc(1)	P11279	3.6987	NA	NA
AANGSLRHexNAc(4)Hex(7)NeuAc(1)	P11279	1	NA	NA
AANGSLRHexNAc(6)Hex(5)Fuc(1)NeuAc(1)	P11279	1.35642	NA	NA
AASMNHTKHexNAc(1)Fuc(1)	Q9UBV2	0.978312	1	NA
AASMNHTKHexNAc(2)Hex(8)	Q9UBV2	NA	1.42718	NA
AASMNHTKHexNAc(2)Hex(9)	Q9UBV2	NA	1.40547	1
ACMNETRHexNAc(2)Hex(6)	P42892	NA	0.677631	0.90605
ACMNETRHexNAc(2)Hex(7)	P42892	NA	1.11109	NA
ACMNETRHexNAc(2)Hex(9)	P42892	1.06802	1.09653	1.03397
ACMNETRHexNAc(4)Hex(5)	P42892	0.765834	0.76779	0.97477
AEDYGPVEVISHWHPNITINIVDDHTPWVKHexNAc(2)Hex(9)	O96005	NA	0.727446	0.948323
AENQTAPGEVPALSNLRPPSRHexNAc(2)Hex(8)	P28300	NA	0.537138	0.311726
AENQTAPGEVPALSNLRPPSRHexNAc(2)Hex(9)	P28300	0.718235	0.719596	0.686751
AENQTAPGEVPALSNLRPPSRHexNAc(6)Hex(4)	P28300	0.723018	NA	NA
AESFNFSSSGRHexNAc(2)Hex(6)	Q3MIT2	0.583923	NA	NA
AFNTTKHexNAc(2)Hex(8)	P35556	NA	NA	1.25338
AFNTTKHexNAc(2)Hex(9)	P35556	NA	NA	1.19012
AGAGDFMRYHYNGSLMDGTLFDSSYSRHexNAc(2)Hex(2)Fuc(1)	Q96AY3	NA	0.682622	NA
AGAGDFMRYHYNGSLMDGTLFDSSYSRHexNAc(7)Hex(4)Fuc(1)	Q96AY3	NA	NA	3.50454
AGPNGTLFVADAYKHexNAc(2)Hex(8)	Q9HDC9	1.18823	NA	NA
AGYFNFTSATITYLAQEDGPVVIGSTSAPGQGGILAQRHexNAc(2)Hex(8)	P43308	1.21423	NA	0.756788
AGYFNFTSATITYLAQEDGPVVIGSTSAPGQGGILAQRHexNAc(2)Hex(9)	P43308	NA	1.17445	NA
AKLGQNFSMEIQKHexNAc(2)Hex(6)	Q8IYW2	NA	NA	0.655218
ALGFENATQALGRHexNAc(2)Hex(8)	Q08380	1.11126	0.92376	0.733089
ALGFENATQALGRHexNAc(2)Hex(9)	Q08380	0.687066	0.761174	0.649884
ALHALNVTWRVRHexNAc(2)Hex(10)	Q9Y2E5	NA	1	NA
ALHALNVTWRVRHexNAc(2)Hex(8)	Q9Y2E5	NA	1	NA
ALMNGSESRHexNAc(2)Hex(10)	P35613	0.91163	1.13331	1.17722
ALMNGSESRHexNAc(2)Hex(7)	P35613	NA	NA	0.440664
ALMNGSESRHexNAc(2)Hex(8)	P35613	0.900335	1.04858	1.01113
ALMNGSESRHexNAc(2)Hex(9)	P35613	NA	NA	0.571921
ALMNGSESRHexNAc(3)Hex(6)Fuc(1)NeuAc(1)	P35613	NA	NA	0.785679
ALSNKHexNAc(2)Hex(9)	Q8TEP8	NA	1	NA
ALSPNSTISSAPKHexNAc(2)Hex(8)	Q9UH99	1.09561	1.70521	1.39652
ALYELAGGTNFSDTVQADPQTVTRHexNAc(2)Hex(8)	Q92542	NA	0.710433	0.562239
AMSSNETAAYKHexNAc(2)Hex(7)	Q8TCJ2	NA	NA	0.498682
AMSSNETAAYKHexNAc(2)Hex(8)	Q8TCJ2	0.683776	0.939338	0.898485
AMSSNETAAYKHexNAc(2)Hex(9)	Q8TCJ2	1.24844	1.42745	1.09562
ANATIEVKHexNAc(2)Hex(8)	Q9Y639	0.834334	0.868945	0.713874
ANATIEVKHexNAc(2)Hex(9)	Q9Y639	1.14589	0.641213	0.633871
ANATIEVKHexNAc(5)Hex(6)	Q9Y639	NA	0.763717	NA
ANATIEVKHexNAc(6)Hex(7)	Q9Y639	NA	NA	1.05512
ANESRLEEADQLYRHexNAc(2)Hex(8)	Q6ZXV5	NA	0.598865	0.28054
ANESRLEEADQLYRHexNAc(2)Hex(9)	Q6ZXV5	NA	NA	0.522686
ANHSGAVVLLKHexNAc(2)Hex(6)	P23229	1.25998	NA	NA
ANHSGAVVLLKHexNAc(2)Hex(8)	P23229	1.61305	1.32583	1.72196
ANHSGAVVLLKHexNAc(2)Hex(9)	P23229	NA	1.41965	NA
ANHSGAVVLLKHexNAc(6)Hex(3)	P23229	NA	NA	0.995029
ANHSLDVSFYFRHexNAc(2)Hex(9)	P78357	0.770787	1.24231	NA
ANMTEHKHexNAc(2)Hex(8)	P33076	0.415973	NA	NA
ANNSWFQSILRHexNAc(2)Hex(8)	Q92542	1.16192	NA	NA
ANNSWFQSILRHexNAc(2)Hex(9)	Q92542	NA	NA	1.40104
ANTTQPGIVEGGQVLKHexNAc(3)Hex(6)NeuAc(1)	P06756	NA	0.147327	NA
ASPAPSHNSGTPAPYAQAVAPPAPSGPSTTQPRPPSVQPSGGGGGGSGGGGSSSSSNSSAGGGAGKHexNAc(9)Hex(10)	O75175	0.142715	NA	NA
ASQNITYHCKHexNAc(2)Hex(6)	P02461	NA	1.46824	1.77415
ASQNITYHCKHexNAc(2)Hex(8)	P02461	1.49427	NA	NA
AYLLPAPPAPGNASESEEDRSAGSVESPSVSSTHRHexNAc(2)Hex(8)	P17936	1.3341	NA	NA
CANETKHexNAc(2)Hex(8)	Q12797	0.969159	1.11463	0.768022
CGYCKNESGSRHexNAc(2)Hex(7)	O95260	NA	NA	1.27039
CGYCKNESGSRHexNAc(2)Hex(8)	O95260	NA	NA	0.65228
CHEGNGTFECGACRHexNAc(2)Hex(7)	P05556	NA	4.67141	3.29817
CHEGNGTFECGACRHexNAc(2)Hex(8)	P05556	0.634779	0.551874	NA
CHEGNGTFECGACRHexNAc(2)Hex(9)	P05556	0.861898	0.812093	0.650014
DAGTYKCIATNKHexNAc(2)Hex(1)Fuc(1)	Q86TC9	NA	1.19013	NA
DAGVVCTNETRHexNAc(2)Hex(10)	Q08380	NA	0.850345	NA
DAGVVCTNETRHexNAc(2)Hex(7)	Q08380	0.61292	0.888821	0.563345
DAGVVCTNETRHexNAc(2)Hex(8)	Q08380	0.823562	0.939808	1.04549
DAGVVCTNETRHexNAc(2)Hex(9)	Q08380	1.06911	1.1071	0.906779
DAVNNITAKHexNAc(2)Hex(7)	P54289	NA	NA	0.910057
DAVNNITAKHexNAc(2)Hex(8)	P54289	0.629986	0.827493	0.682401
DDLDPEKNDSEPGSQRHexNAc(2)Hex(8)	P54289	0.461591	0.49226	NA
DEEVHAGLGELLRSLSNSTARNVTWKHexNAc(9)Hex(4)Fuc(1)	P50454	NA	NA	3.87843
DEIGNVSTSHLLILDDSVEMEIRPRHexNAc(2)Hex(8)	P04843	NA	0.91273	NA
DHLLLPATTHNKHexNAc(2)Hex(10)	P18850	1.80934	1.34857	3.63355
DHLLLPATTHNKHexNAc(2)Hex(9)	P18850	2.3076	1.16174	0.818513
DHPNATVWRHexNAc(2)Hex(9)	Q9UMR5	NA	1.39184	0.725505
DHVHCLGNRHexNAc(2)Hex(8)	Q9BRN9	4.45691	1.94896	1.37471
DLGPTLANSTHHNVRHexNAc(2)Hex(10)	P04062	1.00708	0.993693	0.992475
DLGPTLANSTHHNVRHexNAc(2)Hex(6)	P04062	1.13624	0.802622	1.05131
DLGPTLANSTHHNVRHexNAc(2)Hex(7)	P04062	0.703288	0.75069	1.07163
DLGPTLANSTHHNVRHexNAc(2)Hex(8)	P04062	1.08257	0.874946	0.961803
DLGPTLANSTHHNVRHexNAc(2)Hex(9)	P04062	0.968981	1.03777	0.974461
DLGPTLANSTHHNVRHexNAc(4)Hex(5)Fuc(1)NeuAc(2)	P04062	0.169745	NA	NA
DLGPTLANSTHHNVRHexNAc(5)Hex(6)Fuc(1)NeuAc(3)	P04062	NA	0.42976	NA
DLGPTLANSTHHNVRHexNAc(6)Hex(7)Fuc(1)NeuAc(4)	P04062	NA	1.80637	NA
DLQANDTGRHexNAc(2)Hex(6)	P32004	NA	0.694052	NA
DLQANDTGRHexNAc(2)Hex(7)	P32004	0.941016	1.04186	0.702086
DLQANDTGRHexNAc(2)Hex(8)	P32004	0.928715	0.706343	0.839564
DLQANDTGRHexNAc(2)Hex(9)	P32004	0.711334	0.68397	0.96496
DNATEEEILVYLEKHexNAc(2)Hex(8)	P07602	2.38615	NA	NA
DNATEEEILVYLEKHexNAc(2)Hex(9)	P07602	0.979605	NA	NA
DNATLQATLHAARHexNAc(2)Hex(8)	O15230	NA	0.930905	0.689064
DNATLQATLHAARHexNAc(2)Hex(9)	O15230	NA	0.969912	0.922154
DNHTHSDIQVKHexNAc(2)Hex(10)	Q8IV08	1.4852	NA	1.16381
DNHTHSDIQVKHexNAc(2)Hex(3)Fuc(1)	Q8IV08	0.784752	0.991893	0.927295
DNHTHSDIQVKHexNAc(2)Hex(8)	Q8IV08	0.945595	1.06629	1.11514
DNHTHSDIQVKHexNAc(2)Hex(9)	Q8IV08	0.878768	0.599467	1.12947
DNHTHSDIQVKHexNAc(3)Hex(4)Fuc(1)	Q8IV08	0.682148	0.724894	0.660083
DNNNSNNRGSYNRAPQQQPPPQQPPPPQPPPQQPPPPPSYSPARHexNAc(6)Hex(8)Fuc(1)NeuAc(1)	Q9BUJ2	0.424042	NA	NA
DNTTVTRHexNAc(2)Hex(8)	P11279	1.04004	0.929435	0.950307
DNTTVTRHexNAc(2)Hex(9)	P11279	0.940952	0.755926	0.895438
DNTTVTRHexNAc(4)Hex(5)Fuc(1)NeuAc(1)	P11279	0.863378	0.995915	0.118312
DNTTVTRHexNAc(4)Hex(5)Fuc(1)	P11279	0.871711	0.931194	0.84892
DNTTVTRHexNAc(5)Hex(6)Fuc(1)NeuAc(1)	P11279	NA	NA	0.336442
DNTTVTRHexNAc(7)Hex(4)	P11279	9.21314	NA	NA
DNTTVTRHexNAc(8)Hex(8)Fuc(1)	P11279	NA	1.88911	NA
DPAFKAANGSLRALQATVGNSYKHexNAc(6)Hex(4)NeuAc(1)	P11279	NA	0.146518	NA
DPGAAVPGAANASAQQPRHexNAc(2)Hex(8)	P28300	NA	NA	1.73042
DPGAAVPGAANASAQQPRHexNAc(2)Hex(9)	P28300	0.375694	NA	NA
DQPGHPVNRHexNAc(2)Hex(7)	Q16880	0.54836	NA	NA
DQPGHPVNRHexNAc(2)Hex(8)	Q16880	0.61001	0.964066	1.13053
DQPGHPVNRHexNAc(2)Hex(9)	Q16880	0.753274	0.746866	0.992754
DQPGHPVNRHexNAc(2)	Q16880	1.87776	NA	0.158813
DSCESNHNITCKHexNAc(2)Hex(7)	P56199	NA	1.3889	2.44115
DSCESNHNITCKHexNAc(2)Hex(8)	P56199	0.638676	1.25707	1.00568
DSCESNHNITCKHexNAc(2)Hex(9)	P56199	NA	NA	1.32293
DSCESNHNITCKVGYPFLRHexNAc(2)Hex(7)	P56199	NA	NA	5.61992
DTWGLSDEHFQPRPEAVQFFNVTTLQKHexNAc(2)Hex(8)	O75718	0.729264	0.703067	0.744112
DTWGLSDEHFQPRPEAVQFFNVTTLQKHexNAc(2)Hex(9)	O75718	0.89208	0.997011	0.942526
DVNCSVMGPQEKHexNAc(2)Hex(6)	P53634	NA	0.893185	NA
DVNCSVMGPQEKHexNAc(2)Hex(7)	P53634	NA	1.5245	NA
DYYLNKHexNAc(2)Hex(7)	P42892	NA	NA	0.237313
DYYLNKHexNAc(2)Hex(8)	P42892	0.909038	0.52642	1.10171
DYYLNKHexNAc(2)Hex(9)	P42892	0.91534	0.734788	0.779608
DYYLNKHexNAc(5)Hex(6)Fuc(1)NeuAc(3)	P42892	NA	NA	0.654708
EAAGGNDSSGATSPINPAVALE	P32004	NA	0.740523	NA
EAALNDSPCRHexNAc(1)Fuc(1)	Q68DA7	NA	0.395978	NA
EAALNDSPCRKSRHexNAc(5)Hex(6)Fuc(1)	Q68DA7	NA	0.428051	NA
EAGASRAENQTAPGEVPALSNLRHexNAc(9)Hex(4)Fuc(1)	P28300	2.85829	NA	NA
EAGNITTDGYEILGKHexNAc(7)Hex(6)Fuc(1)	Q99715	NA	0.527987	NA
EAINITLDHKHexNAc(2)Hex(9)	O00469	NA	NA	0.697187
EAQHINKHexNAc(2)Hex(8)	Q9BVG8	NA	NA	4.23959
EDALNETRHexNAc(2)Hex(8)	P10909	NA	NA	0.25568
EDALNETRHexNAc(3)Hex(4)NeuAc(1)	P10909	NA	0.11159	NA
EDIGNYSCLVRHexNAc(2)Hex(8)	A8MVW5	NA	NA	1.40993
EDNISAKSLDSIVSGINNEPNQETTTSEIGTKHexNAc(4)Hex(5)Fuc(1)NeuAc(2)	Q8TDR0	1.86664	NA	NA
EDSPGLLQFEVCPLSESRFSVSFQHPVNDSLVCVVMDVQDSTHVSCKLYKHexNAc(1)	Q15648	NA	1.04009	NA
EDVYRNHSIFLADINQERHexNAc(3)Hex(4)NeuAc(1)	P50897	NA	NA	0.669528
EEDNRHexNAc(2)Hex(3)	Q6V702	NA	5.82372	NA
EEDNRHexNAc(2)Hex(8)	Q6V702	NA	3.01201	NA
EEDNRHexNAc(3)Hex(6)Fuc(1)NeuAc(1)	Q6V702	NA	1.13032	NA
EEDNRHexNAc(4)Hex(3)NeuAc(1)	Q6V702	NA	0.326404	NA
EEDNRHexNAc(4)Hex(4)Fuc(1)NeuAc(1)	Q6V702	NA	2.16325	NA
EEDNRHexNAc(4)Hex(4)Fuc(1)	Q6V702	NA	0.881339	NA
EEDNRHexNAc(4)Hex(6)NeuAc(1)	Q6V702	NA	3.18986	NA
EEDNRHexNAc(5)Hex(7)Fuc(1)NeuAc(1)	Q6V702	NA	0.167339	NA
EEDNRHexNAc(7)Hex(7)Fuc(1)NeuAc(2)	Q6V702	NA	0.242662	NA
EEDNRHexNAc(9)Hex(10)Fuc(1)	Q6V702	NA	1.71541	NA
EEDNRSGKHexNAc(3)Hex(4)Fuc(1)NeuAc(1)	Q6V702	NA	1.53184	NA
EEDNRSGKHexNAc(3)Hex(4)	Q6V702	NA	4.76108	NA
EEDNRSGKHexNAc(8)Hex(8)	Q6V702	NA	0.381098	NA
EEDNRSGKLSSVIFIRHexNAc(5)Hex(8)Fuc(1)	Q6V702	NA	9.74054	NA
EEEAIQLDGLNASQIRHexNAc(2)Hex(1)	P14625	NA	NA	0.106975
EEEENLTRHexNAc(2)Hex(7)	P56277	1.69836	NA	NA
EEEENLTRHexNAc(4)Hex(5)	P56277	NA	NA	2.70321
EEEENLTRHexNAc(5)Hex(3)Fuc(1)NeuAc(1)	P56277	NA	NA	2.17289
EEEENLTRHexNAc(5)Hex(6)NeuAc(3)	P56277	NA	NA	1.3364
EEEENLTRHexNAc(5)Hex(8)	P56277	4.29342	NA	NA
EEEENLTRHexNAc(6)Hex(5)Fuc(1)	P56277	NA	NA	0.161456
EEEENLTRHexNAc(6)Hex(6)Fuc(1)NeuAc(2)	P56277	1.50018	NA	NA
EEEENLTRHexNAc(6)Hex(9)Fuc(1)NeuAc(2)	P56277	0.163465	NA	NA
EEEENLTRHexNAc(7)Hex(7)Fuc(1)NeuAc(3)	P56277	2.22511	NA	NA
EEEENLTRKHexNAc(2)Hex(4)	P56277	2.44094	NA	NA
EEEENLTRKHexNAc(4)Hex(6)Fuc(1)NeuAc(1)	P56277	2.96822	NA	NA
EEEENLTRKHexNAc(6)Hex(6)NeuAc(2)	P56277	NA	NA	0.456881
EEEENLTRKHexNAc(8)Hex(3)	P56277	0.848378	NA	NA
EEEENLTRKSASK	P56277	7.39681	NA	0.178564
EEEPVFTRQDSNRHexNAc(2)Hex(3)Fuc(1)	Q9Y520	1.94087	NA	NA
EEEPVFTRQDSNRHexNAc(3)Hex(6)	Q9Y520	NA	0.302624	NA
EEEPVFTRQDSNRHexNAc(5)Hex(4)NeuAc(2)	Q9Y520	NA	0.333063	NA
EEEPVFTRQDSNRHexNAc(5)Hex(5)NeuAc(2)	Q9Y520	1.47279	NA	NA
EEEPVFTRQDSNRHexNAc(5)Hex(6)Fuc(1)	Q9Y520	NA	NA	0.11995
EEEPVFTRQDSNRHexNAc(5)Hex(6)NeuAc(3)	Q9Y520	0.83606	NA	NA
EEEPVFTRQDSNRHexNAc(6)Hex(4)Fuc(1)	Q9Y520	1.6398	NA	NA
EEEPVFTRQDSNRHexNAc(6)Hex(6)NeuAc(1)	Q9Y520	NA	1.27675	NA
EEEPVFTRQDSNRSEKHexNAc(2)Hex(10)	Q9Y520	NA	NA	0.648008
EEEPVFTRQDSNRSEKHexNAc(3)Hex(4)	Q9Y520	NA	0.334263	NA
EEEPVFTRQDSNRSEKHexNAc(6)Hex(7)Fuc(1)NeuAc(2)	Q9Y520	NA	NA	1.80304
EEFSKLQNKHexNAc(2)Hex(8)	P14060	0.51294	NA	NA
EEFSKLQNKHexNAc(2)Hex(9)	P14060	NA	NA	0.638596
EEFSKLQNKHexNAc(6)Hex(6)Fuc(1)NeuAc(1)	P14060	1.18704	NA	NA
EENETEIKHexNAc(2)Hex(11)	Q4LE39	0.457165	NA	NA
EENETEIKHexNAc(3)Hex(4)NeuAc(1)	Q4LE39	0.198148	NA	NA
EENETEIKHexNAc(9)Hex(4)	Q4LE39	0.330486	NA	NA
EENFSSPKHexNAc(3)Hex(5)NeuAc(1)	Q96SB8	4.25188	NA	NA
EENKHexNAc(2)Fuc(1)	Q5SSJ5	0.377631	NA	NA
EENKHexNAc(2)Hex(1)	Q5SSJ5	0.352083	NA	NA
EENKHexNAc(2)Hex(2)	Q5SSJ5	NA	2.12736	NA
EENKHexNAc(2)Hex(7)	Q5SSJ5	NA	0.159068	NA
EENKHexNAc(4)Hex(4)	Q5SSJ5	NA	NA	0.121849
EENKHexNAc(4)Hex(6)	Q5SSJ5	NA	0.305595	0.35885
EENKHexNAc(5)Hex(3)Fuc(1)NeuAc(1)	Q5SSJ5	NA	0.377209	NA
EENKHexNAc(5)Hex(4)NeuAc(1)	Q5SSJ5	NA	0.421305	NA
EENKHexNAc(5)Hex(4)NeuAc(2)	Q5SSJ5	NA	0.395009	NA
EENKHexNAc(5)Hex(5)NeuAc(1)	Q5SSJ5	1.1793	NA	NA
EENKHexNAc(5)Hex(6)Fuc(1)NeuAc(1)	Q5SSJ5	1.81831	NA	NA
EENKHexNAc(5)Hex(6)Fuc(1)NeuAc(2)	Q5SSJ5	NA	NA	2.23153
EENKHexNAc(5)Hex(6)NeuAc(3)	Q5SSJ5	NA	0.351711	NA
EENKHexNAc(6)Hex(3)Fuc(1)NeuAc(1)	Q5SSJ5	2.1633	NA	NA
EENKHexNAc(6)Hex(3)Fuc(1)	Q5SSJ5	1.01249	NA	NA
EENKHexNAc(6)Hex(7)Fuc(1)NeuAc(3)	Q5SSJ5	2.60322	NA	NA
EENKHexNAc(7)Hex(7)	Q5SSJ5	NA	0.616174	NA
EENKHexNAc(8)Hex(5)	Q5SSJ5	NA	1.42789	NA
EENKHexNAc(9)Hex(3)	Q5SSJ5	NA	NA	0.233395
EENLSEDSKHexNAc(7)Hex(3)	Q9UQR0	NA	NA	0.196124
EENLSEDSKHexNAc(9)Hex(10)	Q9UQR0	NA	NA	0.648939
EENLSEDSKHexNAc(9)Hex(3)	Q9UQR0	NA	0.516737	NA
EEQGKVYVYALNQTRHexNAc(1)	P56199	NA	NA	0.323815
EEQGKVYVYALNQTRHexNAc(2)Hex(3)	P56199	NA	1.03934	NA
EEQGKVYVYALNQTRHexNAc(2)Hex(9)	P56199	2.15161	NA	NA
EEQNSSSLLEENKHexNAc(2)Hex(8)	Q4LE39	0.190347	NA	NA
EGKPINLSHRHexNAc(2)Hex(9)	P41212	0.730508	NA	NA
EGSLQCECEHNTTGPDCGKHexNAc(2)Hex(8)	Q96CW9	4.37909	NA	NA
EIRLSENASKHexNAc(2)Hex(7)	O75151	NA	0.143423	NA
EIRLSENASKHexNAc(2)Hex(8)	O75151	0.157089	0.11171	NA
ELQQKINNSSNKHexNAc(5)Hex(6)NeuAc(2)	Q3MIT2	2.4343	NA	NA
ENGTLKHexNAc(3)Hex(5)NeuAc(1)	P18850	NA	2.31127	NA
ENGTLKHexNAc(3)Hex(6)NeuAc(1)	P18850	NA	0.879609	NA
ENGTLKHexNAc(5)Hex(3)Fuc(1)NeuAc(1)	P18850	NA	1.09432	NA
ENGTLKHexNAc(5)Hex(6)Fuc(1)NeuAc(2)	P18850	NA	0.232167	NA
ENGTLKHexNAc(6)Hex(5)Fuc(1)	P18850	NA	0.293639	NA
ENGTLKHexNAc(6)Hex(6)NeuAc(2)	P18850	NA	0.198773	NA
ENGTLKHexNAc(6)Hex(7)Fuc(1)NeuAc(4)	P18850	NA	0.832416	NA
ENKHexNAc(2)Fuc(1)	A0MZ66	NA	0.868145	NA
ENKHexNAc(2)Hex(2)	A0MZ66	0.137004	1.39513	NA
ENKHexNAc(2)Hex(2)Fuc(1)	A0MZ66	0.457865	0.664887	0.458508
ENKHexNAc(2)Hex(3)	A0MZ66	0.827524	0.993733	NA
ENKHexNAc(2)Hex(4)	A0MZ66	NA	NA	0.532898
ENKHexNAc(2)Hex(9)	A0MZ66	NA	NA	0.808923
ENKHexNAc(3)Hex(4)	A0MZ66	NA	NA	0.375258
ENKHexNAc(3)Hex(5)Fuc(1)	A0MZ66	NA	NA	1.76469
ENKHexNAc(3)Hex(5)NeuAc(1)	A0MZ66	NA	0.793054	NA
ENKHexNAc(3)Hex(6)NeuAc(1)	A0MZ66	1.05222	NA	NA
ENKHexNAc(4)Hex(5)Fuc(1)NeuAc(2)	A0MZ66	0.908566	NA	NA
ENKHexNAc(4)Hex(5)NeuAc(1)	A0MZ66	NA	3.44275	NA
ENKHexNAc(4)Hex(5)NeuAc(2)	A0MZ66	NA	2.08273	NA
ENKHexNAc(4)Hex(6)NeuAc(1)	A0MZ66	NA	NA	1.78174
ENKHexNAc(4)Hex(7)NeuAc(1)	A0MZ66	NA	NA	3.40708
ENKHexNAc(5)Hex(4)	A0MZ66	NA	1.7123	NA
ENKHexNAc(5)Hex(4)Fuc(1)	A0MZ66	NA	NA	4.47377
ENKHexNAc(5)Hex(5)Fuc(1)NeuAc(1)	A0MZ66	0.816014	NA	NA
ENKHexNAc(5)Hex(5)Fuc(1)NeuAc(2)	A0MZ66	NA	NA	1.80321
ENKHexNAc(5)Hex(5)NeuAc(2)	A0MZ66	0.847993	NA	NA
ENKHexNAc(5)Hex(6)	A0MZ66	6.73567	NA	NA
ENKHexNAc(5)Hex(6)NeuAc(1)	A0MZ66	NA	0.716376	NA
ENKHexNAc(5)Hex(6)NeuAc(3)	A0MZ66	NA	NA	0.641248
ENKHexNAc(5)Hex(7)Fuc(1)NeuAc(1)	A0MZ66	NA	0.297575	NA
ENKHexNAc(6)Hex(3)Fuc(1)NeuAc(2)	A0MZ66	NA	0.312289	NA
ENKHexNAc(6)Hex(4)NeuAc(1)	A0MZ66	1.53096	0.355071	NA
ENKHexNAc(6)Hex(5)Fuc(1)NeuAc(1)	A0MZ66	4.29013	NA	NA
ENKHexNAc(6)Hex(6)Fuc(1)NeuAc(3)	A0MZ66	NA	NA	0.398425
ENKHexNAc(6)Hex(7)NeuAc(4)	A0MZ66	1.38939	NA	NA
ENKHexNAc(6)Hex(8)NeuAc(1)	A0MZ66	NA	3.90629	NA
ENKHexNAc(7)Hex(3)Fuc(1)	A0MZ66	NA	1.77076	NA
ENKHexNAc(7)Hex(4)	A0MZ66	NA	2.70866	NA
ENKHexNAc(7)Hex(6)	A0MZ66	0.657616	NA	NA
ENKHexNAc(7)Hex(7)	A0MZ66	NA	0.934581	NA
ENKHexNAc(7)Hex(7)Fuc(1)NeuAc(4)	A0MZ66	6.53489	NA	NA
ENKHexNAc(8)Hex(5)Fuc(1)	A0MZ66	0.684634	NA	NA
ENKTLKHexNAc(4)Hex(4)NeuAc(1)	A0MZ66	0.865891	NA	NA
ENKTLKHexNAc(5)Hex(4)NeuAc(1)	A0MZ66	1.1486	NA	NA
ENNSEDQGSKHexNAc(2)Hex(9)	Q9Y520	3.28549	NA	NA
ENNSSRHexNAc(10)Hex(10)Fuc(1)	P51816	6.57426	NA	NA
ENNSSRHexNAc(11)Hex(11)NeuAc(1)	P51816	NA	6.07776	NA
ENNSSRHexNAc(2)Hex(1)	P51816	3.19149	NA	NA
ENNSSRHexNAc(6)Hex(9)Fuc(1)NeuAc(2)	P51816	NA	1.19152	NA
ENNSSRRHexNAc(6)Hex(7)NeuAc(4)	P51816	NA	NA	6.62906
ENNSSRRHexNAc(8)Hex(3)	P51816	NA	6.47573	NA
ENQNHSYSLKHexNAc(6)Hex(5)	P06756	0.244274	NA	NA
ENQNHSYSLKHexNAc(6)Hex(7)Fuc(1)	P06756	NA	1.881	NA
ENSSQSKKHexNAc(2)Hex(7)	P51815	NA	0.408334	0.357849
ENVGIYNLSKHexNAc(2)Hex(5)Fuc(1)	Q15155	NA	NA	2.09973
ENVGIYNLSKHexNAc(7)Hex(3)Fuc(1)	P69849	0.303984	NA	NA
ENVSNCIQLKHexNAc(2)Hex(8)	Q9ULC4	0.249789	NA	NA
EPLEVSEWNKNSSKHexNAc(2)Hex(9)	Q86UP3	1.23906	NA	NA
EPNFTLKHexNAc(1)Fuc(1)	Q92545	0.263373	NA	NA
EPNFTLKHexNAc(2)Hex(10)	Q92545	0.865377	NA	NA
EPNFTLKHexNAc(3)Hex(4)NeuAc(1)	Q92545	NA	NA	0.589383
EPNFTLKHexNAc(3)Hex(6)Fuc(1)NeuAc(1)	Q92545	0.378687	NA	NA
EPNFTLKHexNAc(3)Hex(6)Fuc(1)	Q92545	NA	NA	0.602958
EPNFTLKHexNAc(4)Hex(3)NeuAc(1)	Q92545	NA	NA	0.751744
EPNFTLKHexNAc(5)Hex(4)NeuAc(2)	Q92545	1.17023	NA	NA
EPNFTLKHexNAc(6)Hex(3)	Q92545	1.9364	NA	NA
EPNFTLKHexNAc(6)Hex(6)Fuc(1)NeuAc(1)	Q92545	0.755382	NA	NA
EPNFTLKHexNAc(8)Hex(3)Fuc(1)	Q92545	NA	NA	0.46168
EPNFTLKHexNAc(9)Hex(6)	Q92545	4.66619	NA	NA
EPNFTLKHexNAc(9)Hex(9)Fuc(1)	Q92545	1.89489	NA	NA
EPNFTLKRHexNAc(2)Hex(2)	Q92545	NA	NA	0.271337
EPNFTLKRHexNAc(2)Hex(8)	Q92545	NA	NA	0.374013
EPNFTLKRHexNAc(4)Hex(4)Fuc(1)	Q92545	NA	NA	0.242252
EPNFTLKRHexNAc(4)Hex(7)NeuAc(1)	Q92545	0.123043	NA	NA
EQEAAMEIQEPAANKHexNAc(2)Hex(9)	Q92576	NA	NA	0.599078
EQEAAMEIQEPAANKHexNAc(3)Hex(4)NeuAc(1)	Q92576	NA	NA	0.191116
EQEAAMEIQEPAANKHexNAc(3)Hex(5)	Q92576	NA	NA	0.335621
EQEAAMEIQEPAANKHexNAc(6)Hex(6)Fuc(1)NeuAc(2)	Q92576	NA	NA	6.7658
EQEAAMEIQEPAANKHexNAc(6)Hex(6)NeuAc(1)	Q92576	NA	NA	3.46986
EQEAAMEIQEPAANKHexNAc(7)Hex(8)	Q92576	NA	NA	6.32237
EQEAAMEIQEPAANKHexNAc(9)Hex(6)	Q92576	NA	NA	1.71439
ESKNISKERHexNAc(2)Hex(8)	Q68DA7	NA	0.405123	NA
ETVCINATVCFDVKLKSKHexNAc(3)Hex(4)	P56199	0.27943	NA	NA
FFNFSWRHexNAc(2)Hex(10)	P42892	NA	1.73137	NA
FFNFSWRHexNAc(2)Hex(2)Fuc(1)	P42892	1	NA	NA
FFNFSWRHexNAc(2)Hex(8)	P42892	1.60801	NA	NA
FHIYNGTRHexNAc(2)Hex(9)	Q93008	NA	NA	1
FINYNQTVSRHexNAc(2)Hex(8)	Q8N766	1.53963	2.0738	3.27976
FINYNQTVSRHexNAc(2)Hex(9)	Q8N766	2.21771	1.7743	1.63831
FLKPYTLEEQKNLTVCPDGALFEQKHexNAc(2)Hex(8)	P54709	0.215771	1.23211	0.950388
FLQKHLNASNPTEPATIIFTAARHexNAc(5)Hex(5)NeuAc(2)	Q8NFQ8	NA	NA	2.0322
FNLSKHexNAc(2)Hex(8)	Q92545	NA	0.523389	NA
FNLSKHexNAc(2)Hex(9)	Q92545	NA	0.698105	NA
FNQCNTTRHexNAc(1)Fuc(1)	P09923	1.45406	NA	NA
FNQCNTTRHexNAc(2)Hex(10)	P09923	0.995347	NA	NA
FNQCNTTRHexNAc(2)Hex(7)	P09923	1.23071	NA	NA
FNQCNTTRHexNAc(2)Hex(8)	P05187	NA	1.46454	NA
FNQCNTTRHexNAc(2)Hex(9)	P05187	NA	1.54772	NA
FNQCNTTRHexNAc(4)Hex(5)Fuc(1)NeuAc(1)	P05187	NA	0.751778	NA
FNQCNTTRHexNAc(4)Hex(5)Fuc(1)NeuAc(2)	P05187	NA	1.00288	NA
FNQCNTTRHexNAc(4)Hex(5)Fuc(1)	P10696	1.72508	1.29366	1.3811
FNQCNTTRHexNAc(6)Hex(7)	P05187	NA	3.36019	NA
FNSSSSSLEEKHexNAc(2)Hex(6)	Q9H173	0.784109	0.782282	1.67734
FNSSSSSLEEKHexNAc(2)Hex(7)	Q9H173	0.79506	1.03588	0.783167
FNSSSSSLEEKHexNAc(2)Hex(8)	Q9H173	0.89541	0.891951	0.913944
FNSSSSSLEEKHexNAc(2)Hex(9)	Q9H173	NA	0.416446	NA
FNSSSSSLEEKHexNAc(4)Hex(5)Fuc(1)	Q9H173	NA	0.954263	NA
FNSSSSSLEEKHexNAc(8)Hex(9)Fuc(1)	Q9H173	NA	NA	8.93687
FTFTSHTPGDHQICLHSNSTRHexNAc(2)Hex(6)	Q7Z7H5	2.09002	NA	NA
FTFTSHTPGDHQICLHSNSTRHexNAc(2)Hex(7)	Q7Z7H5	0.782728	NA	3.01093
FTFTSHTPGDHQICLHSNSTRHexNAc(2)Hex(8)	Q7Z7H5	0.831875	NA	1.30874
FTFTSHTPGDHQICLHSNSTRHexNAc(3)Hex(4)Fuc(1)NeuAc(1)	Q7Z7H5	NA	NA	1.55372
FTFTSHTPGDHQICLHSNSTRHexNAc(4)Hex(5)Fuc(1)NeuAc(1)	Q7Z7H5	NA	NA	0.930751
FTFTSHTPGDHQICLHSNSTRHexNAc(4)Hex(5)Fuc(1)NeuAc(2)	Q7Z7H5	0.467558	NA	NA
FTFTSHTPGDHQICLHSNSTRHexNAc(6)Hex(3)	Q7Z7H5	0.986444	NA	NA
FTFTSHTPGDHQICLHSNSTRHexNAc(6)Hex(7)NeuAc(3)	Q7Z7H5	0.674853	NA	NA
FTFTSHTPGEHQICLHSNSTKHexNAc(2)Hex(6)	Q9BVK6	1.17987	1.29118	1.31155
FTFTSHTPGEHQICLHSNSTKHexNAc(2)Hex(7)	Q9BVK6	1.08746	1.17353	1.07874
FTFTSHTPGEHQICLHSNSTKHexNAc(2)Hex(8)	Q9BVK6	1.10446	1.15482	1.16985
FTFTSHTPGEHQICLHSNSTKHexNAc(3)Hex(4)Fuc(1)NeuAc(1)	Q9BVK6	NA	NA	0.743485
FTFTSHTPGEHQICLHSNSTKHexNAc(4)Hex(5)Fuc(1)NeuAc(2)	Q9BVK6	NA	0.50949	0.684485
FTFTSHTPGEHQICLHSNSTKHexNAc(6)Hex(3)	Q9BVK6	NA	NA	0.489265
FTPVHNRHexNAc(2)Hex(8)	Q92545	NA	NA	1.34738
FTPVHNRHexNAc(2)Hex(9)	Q92545	1.53357	1.54288	1.41453
FVNDTKHexNAc(2)Hex(8)	P78536	1.05182	0.941189	1.26219
FVNDTKHexNAc(2)Hex(9)	P78536	0.842002	0.740484	0.874344
GASNLTWRHexNAc(2)Hex(6)	P15586	0.825788	NA	NA
GASNLTWRHexNAc(2)Hex(7)	P15586	1.27564	1.40408	1.35522
GASNLTWRHexNAc(2)Hex(8)	P15586	NA	0.988012	0.891645
GDGGGAGGGGGGGGSGGGGSGGGGGGGSSRPPAPQENTTSEAGLPQGEARHexNAc(9)Hex(3)Fuc(1)	Q9UKM9	NA	0.29444	NA
GDKNVTMGQSSARHexNAc(2)Hex(8)	P48960	NA	NA	0.196998
GDKNVTMGQSSARHexNAc(2)Hex(9)	P48960	0.168361	NA	NA
GDKNVTMGQSSARHexNAc(3)Hex(5)Fuc(1)	P48960	NA	0.162995	0.131906
GDKNVTMGQSSARHexNAc(3)Hex(6)	P48960	NA	0.725949	0.67597
GDKNVTMGQSSARHexNAc(4)Hex(5)Fuc(1)NeuAc(1)	P48960	NA	0.13615	0.123787
GDKNVTMGQSSARHexNAc(4)Hex(5)Fuc(1)NeuAc(2)	P48960	NA	1.12948	0.976032
GDKNVTMGQSSARHexNAc(4)Hex(5)Fuc(1)	P48960	0.882813	0.902317	0.998555
GDKNVTMGQSSARHexNAc(4)Hex(5)	P48960	0.901153	0.888033	0.824537
GDKNVTMGQSSARHexNAc(5)Hex(6)Fuc(1)	P48960	NA	1.00621	1.22498
GDPSVISVNGTDFTFRHexNAc(2)Hex(9)	Q9UHN6	NA	0.369401	NA
GFSEDRLLIAGTNSSDLQQILSLLESNKHexNAc(5)Hex(5)Fuc(1)NeuAc(1)	P08195	NA	NA	0.59163
GGPRNDTEERHexNAc(2)Hex(8)	Q15818	0.687829	0.827963	NA
GGYGGGGPGYGNQGGGYGGGGGYDGYNEGGNFGGGNYGGGGNYNDFGNYSGQQQSNYGPMKHexNAc(5)Hex(6)Fuc(1)NeuAc(2)	P51991	NA	NA	1.57224
GHDLNEDGLVSWEEYKNATYGYVLDDPDPDDGFNYKHexNAc(2)Hex(6)	O43852	NA	0.635583	NA
GHDLNEDGLVSWEEYKNATYGYVLDDPDPDDGFNYKHexNAc(2)Hex(8)	O43852	0.548112	NA	NA
GHDLNEDGLVSWEEYKNATYGYVLDDPDPDDGFNYKHexNAc(4)Hex(3)Fuc(1)	O43852	NA	1.77158	NA
GHDLNEDGLVSWEEYKNATYGYVLDDPDPDDGFNYKHexNAc(4)Hex(4)Fuc(1)	O43852	0.128388	0.452281	NA
GHDLNEDGLVSWEEYKNATYGYVLDDPDPDDGFNYKHexNAc(5)Hex(3)Fuc(1)	O43852	0.458824	0.144224	NA
GHDLNEDGLVSWEEYKNATYGYVLDDPDPDDGFNYKHexNAc(6)Hex(3)	O43852	NA	1.21854	NA
GHEVEDVDLELFNTSVQLQPPTTAPGPETAAFIERHexNAc(2)Hex(8)	Q5UCC4	NA	0.454094	0.798645
GHEVEDVDLELFNTSVQLQPPTTAPGPETAAFIERHexNAc(3)Hex(4)Fuc(1)NeuAc(1)	Q5UCC4	0.230865	NA	NA
GHEVEDVDLELFNTSVQLQPPTTAPGPETAAFIERHexNAc(6)Hex(3)	Q5UCC4	0.272724	NA	NA
GHHVSQEPWNSSITLTSQAGAVFQSFAKHexNAc(2)Hex(5)	O00115	NA	NA	1.61897
GHHVSQEPWNSSITLTSQAGAVFQSFAKHexNAc(2)Hex(6)	O00115	1.28054	1.30043	1.77093
GHHVSQEPWNSSITLTSQAGAVFQSFAKHexNAc(2)Hex(8)	O00115	NA	NA	0.543196
GHHVSQEPWNSSITLTSQAGAVFQSFAKHexNAc(2)Hex(9)	O00115	1.66377	1.44832	NA
GHTLTLNFTRHexNAc(2)Hex(10)	P11279	NA	NA	1.95425
GHTLTLNFTRHexNAc(2)Hex(6)	P11279	1.24895	NA	0.756733
GHTLTLNFTRHexNAc(2)Hex(7)	P11279	1	1	1.62714
GHTLTLNFTRHexNAc(2)Hex(9)	P11279	1	1.56775	1.37611
GHTLTLNFTRHexNAc(3)Hex(6)NeuAc(1)	P11279	1.04792	0.624554	0.967423
GHTLTLNFTRHexNAc(6)Hex(4)	P11279	1.07264	NA	NA
GHTLTLNFTRNATRHexNAc(4)Hex(6)NeuAc(1)	P11279	1	NA	NA
GHTLTLNFTRNATRHexNAc(5)Hex(8)Fuc(1)	P11279	NA	0.345745	NA
GICNSSDVRHexNAc(2)Hex(8)	O75882	NA	NA	1.23311
GINESYKHexNAc(1)Fuc(1)	P50897	1.31491	NA	NA
GINESYKHexNAc(2)Hex(1)	P50897	0.308598	NA	NA
GINESYKHexNAc(2)Hex(7)	P50897	0.790796	0.867144	0.91654
GINESYKHexNAc(3)Hex(4)	P50897	1.27136	NA	NA
GINESYKHexNAc(8)Hex(8)	P50897	NA	4.25649	NA
GINESYKKHexNAc(2)Hex(10)	P50897	NA	NA	2.13996
GINESYKKHexNAc(2)Hex(5)Fuc(1)	P50897	NA	0.560291	NA
GINESYKKHexNAc(2)Hex(6)	P50897	0.95001	0.949577	0.924599
GINESYKKHexNAc(2)Hex(7)	P50897	0.713268	0.810137	0.742625
GINESYKKHexNAc(2)Hex(9)	P50897	0.824423	0.781024	NA
GKDLDTDFTNNASQPETKHexNAc(2)Hex(10)	O75976	0.45651	0.774826	0.910191
GKDLDTDFTNNASQPETKHexNAc(2)Hex(6)	O75976	NA	NA	0.264333
GKDLDTDFTNNASQPETKHexNAc(2)Hex(7)	O75976	0.424622	NA	NA
GKDLDTDFTNNASQPETKHexNAc(2)Hex(8)	O75976	NA	0.29295	NA
GKDLDTDFTNNASQPETKHexNAc(2)Hex(9)	O75976	0.812911	0.475213	NA
GKDLDTDFTNNASQPETKHexNAc(3)Hex(6)	O75976	NA	NA	0.58466
GKDLDTDFTNNASQPETKHexNAc(4)Hex(5)Fuc(1)	O75976	0.300662	0.249096	0.733536
GLNLTEDTYKPRHexNAc(2)Hex(10)	Q08380	0.699265	0.698508	0.856298
GLNLTEDTYKPRHexNAc(2)Hex(8)	Q08380	NA	1.86683	NA
GLNLTEDTYKPRHexNAc(2)Hex(9)	Q08380	1.03543	0.875183	0.90243
GNITEYQCHQYITKHexNAc(4)Hex(5)Fuc(1)NeuAc(2)	Q92896	0.56401	0.786734	NA
GNNSSNIWALRHexNAc(2)Hex(8)	P35612	NA	6.1244	NA
GNVSACARHexNAc(2)Hex(9)	O14656	NA	3.9023	5.4254
GNVTQHVQGHRHexNAc(2)Hex(10)	Q15043	1.76304	1.67591	NA
GNVTQHVQGHRHexNAc(2)Hex(7)	Q15043	0.525867	NA	NA
GNVTQHVQGHRHexNAc(2)Hex(8)	Q15043	1.54262	1.49036	1.22094
GNVTQHVQGHRHexNAc(2)Hex(9)	Q15043	1.4773	1.46758	1.79715
GNVTQHVQGHRHexNAc(4)Hex(5)Fuc(1)NeuAc(1)	Q15043	0.699581	0.809659	0.768531
GNVTQHVQGHRHexNAc(4)Hex(5)Fuc(1)NeuAc(2)	Q15043	0.546934	0.841863	0.481231
GNVTQHVQGHRHexNAc(4)Hex(5)Fuc(1)	Q15043	1.56002	1.49941	1
GNVTQHVQGHRHexNAc(5)Hex(5)NeuAc(2)	Q15043	NA	0.233292	NA
GNVTQHVQGHRHexNAc(5)Hex(6)Fuc(1)NeuAc(1)	Q15043	0.900543	0.622284	0.541874
GNVTQHVQGHRHexNAc(5)Hex(6)Fuc(1)NeuAc(2)	Q15043	1.51259	1.45113	1.40283
GNVTQHVQGHRHexNAc(5)Hex(6)Fuc(1)NeuAc(3)	Q15043	NA	2.20209	1.74104
GNVTQHVQGHRHexNAc(5)Hex(6)Fuc(1)	Q15043	1.77678	2.01118	1.84361
GNVTQHVQGHRHexNAc(6)Hex(7)Fuc(1)NeuAc(1)	Q15043	1.47883	1.3617	1.30161
GNVTQHVQGHRHexNAc(6)Hex(7)Fuc(1)NeuAc(2)	Q15043	NA	1.65807	1.60112
GNVTQHVQGHRHexNAc(8)Hex(5)	Q15043	3.39879	3.57937	9.13953
GNYDFVQAMIVNNHTSLDVEEAAAVRHexNAc(2)Hex(8)	Q6PIU2	0.642875	0.809336	0.848259
GNYDFVQAMIVNNHTSLDVEEAAAVRHexNAc(2)Hex(9)	Q6PIU2	NA	0.995114	NA
GPGIKPNQTSKHexNAc(2)Hex(10)	P15586	NA	1.6606	NA
GPGIKPNQTSKHexNAc(2)Hex(6)	P15586	NA	0.815511	0.791142
GPGIKPNQTSKHexNAc(2)Hex(7)	P15586	1.39703	1.56543	1.44899
GPGIKPNQTSKHexNAc(2)Hex(8)	P15586	1.0736	0.524009	NA
GPGIKPNQTSKHexNAc(2)Hex(9)	P15586	1	1.31447	1.28688
GPGIKPNQTSKHexNAc(4)Hex(3)NeuAc(1)	P15586	0.687713	NA	NA
GPGIKPNQTSKHexNAc(8)Hex(9)Fuc(1)NeuAc(4)	P15586	NA	1.79632	NA
GQTALGFLYASGLGVNSSQAKHexNAc(2)Hex(9)	Q9UBV2	1.31735	1.05847	0.729554
GRDIYTFDGALNKHexNAc(2)Hex(7)	Q08722	NA	0.476419	NA
GRDLNRHexNAc(5)Hex(5)Fuc(1)	O75976	NA	6.38127	NA
GSATFNSTEGVLQHLLRHexNAc(2)Hex(7)	Q8WXI7	1.07514	NA	0.164987
GSATFNSTEGVLQHLLRHexNAc(2)Hex(8)	Q8WXI7	0.14362	NA	0.12488
GSGPASEFTFSTPEGVPGHPEALHLECQSNTSLLLRHexNAc(2)Hex(8)	P32004	0.318172	NA	NA
GSGPASEFTFSTPEGVPGHPEALHLECQSNTSLLLRHexNAc(2)Hex(9)	P32004	1.46902	NA	NA
GSHYVAIVFESNSSYLGRHexNAc(4)Hex(5)Fuc(1)NeuAc(2)	Q6ZRP7	NA	0.153689	NA
GTLNRYSNFYNKHexNAc(2)Hex(8)	Q14999	NA	0.911784	NA
GTNYTVRHexNAc(2)Hex(6)	P07942	0.812942	0.875818	NA
GTNYTVRHexNAc(2)Hex(7)	P07942	1.18384	NA	NA
GTNYTVRHexNAc(2)Hex(8)	P07942	1.32177	1.32188	1.43653
GTNYTVRHexNAc(2)Hex(9)	P07942	NA	1.27514	1.41046
GVPWNFTFNVKHexNAc(2)Hex(3)Fuc(1)	P11171	1.9182	NA	NA
GVYELTHNNKHexNAc(2)Hex(10)	Q7Z388	1.15025	NA	NA
GVYELTHNNKHexNAc(2)Hex(6)	Q7Z388	1.0232	NA	0.629658
GVYELTHNNKHexNAc(2)Hex(8)	Q7Z388	3.07761	NA	8.94095
GYNVTYWRHexNAc(2)Hex(7)	P32004	1.33965	NA	1.22297
GYNVTYWRHexNAc(2)Hex(8)	P32004	1.56104	1.49551	1.51107
GYNVTYWRHexNAc(2)Hex(9)	P32004	NA	NA	1.83389
GYYNQSEAGSHTIQRHexNAc(2)Hex(10)	Q95604	NA	0.916317	1.03843
GYYNQSEAGSHTIQRHexNAc(2)Hex(7)	Q95604	0.571406	NA	NA
GYYNQSEAGSHTIQRHexNAc(2)Hex(8)	Q95604	1.2374	0.929253	0.66472
GYYNQSEAGSHTIQRHexNAc(2)Hex(9)	Q95604	1.29599	1.6409	1.30927
GYYNQSEAGSHTIQRHexNAc(4)Hex(5)Fuc(1)NeuAc(1)	Q95604	0.22365	0.432017	0.244583
GYYNQSEAGSHTIQRHexNAc(4)Hex(5)Fuc(1)NeuAc(2)	Q95604	0.229289	1.67372	0.217293
GYYNQSEAGSHTIQRHexNAc(4)Hex(5)Fuc(1)	Q95604	NA	1.4868	1.11802
GYYNQSEAGSHTIQRHexNAc(5)Hex(6)Fuc(1)NeuAc(2)	Q95604	0.345304	NA	NA
GYYNQSEAGSHTLQRHexNAc(2)Hex(10)	P30466	NA	0.916317	1.03843
GYYNQSEAGSHTLQRHexNAc(2)Hex(7)	P30466	0.592144	NA	NA
GYYNQSEAGSHTLQRHexNAc(2)Hex(8)	P30466	1.2374	0.958549	0.66472
GYYNQSEAGSHTLQRHexNAc(2)Hex(9)	P30466	1.29599	1.6409	1.30927
GYYNQSEAGSHTLQRHexNAc(4)Hex(5)Fuc(1)NeuAc(1)	P30466	0.22365	0.224158	0.244583
GYYNQSEAGSHTLQRHexNAc(4)Hex(5)Fuc(1)NeuAc(2)	P30466	0.229289	1.67372	0.217293
GYYNQSEAGSHTLQRHexNAc(4)Hex(5)Fuc(1)	P30466	NA	1.4868	1.11802
GYYNQSEAGSHTLQRHexNAc(5)Hex(6)Fuc(1)NeuAc(2)	P30466	0.345304	NA	NA
HFNRHexNAc(2)Hex(10)	Q99941	1.39174	1.53785	NA
HFNRHexNAc(2)Hex(8)	Q99941	NA	1.84102	NA
HGLNRHexNAc(2)Hex(9)	Q8TD26	NA	NA	0.255874
HIWSLEISNKPNVSEPEEPKHexNAc(2)Hex(9)	O75976	0.454938	NA	NA
HLLENSTASVSEAERHexNAc(2)Hex(10)	P42892	0.488193	NA	NA
HLLENSTASVSEAERHexNAc(2)Hex(7)	P42892	NA	0.29946	0.209592
HLLENSTASVSEAERHexNAc(2)Hex(8)	P42892	0.854654	0.638682	0.570065
HLLENSTASVSEAERHexNAc(2)Hex(9)	P42892	0.458559	0.730908	NA
HLLENSTASVSEAERHexNAc(4)Hex(5)Fuc(1)	P42892	0.646155	0.754853	0.390846
HLNASNPTEPATIIFTAARHexNAc(2)Hex(8)	Q8NFQ8	0.887201	0.88473	0.840355
HLNASNPTEPATIIFTAARHexNAc(2)Hex(9)	Q8NFQ8	2.188	NA	NA
HLNGTITAKHexNAc(2)Hex(7)	Q6YHK3	1	1.71057	1
HLNGTITAKHexNAc(2)Hex(8)	Q6YHK3	1	1.29397	1.33554
HLNGTITAKHexNAc(2)Hex(9)	Q6YHK3	NA	1.07173	1.18742
HLNGTITAKHexNAc(3)Hex(5)NeuAc(1)	Q6YHK3	NA	0.309621	NA
HLNSSHPRHexNAc(2)Hex(10)	Q5JTV8	1.56172	1.36185	1.15852
HLNSSHPRHexNAc(2)Hex(5)	Q5JTV8	0.967443	NA	NA
HLNSSHPRHexNAc(2)Hex(6)	Q5JTV8	1.25596	1.02862	1
HLNSSHPRHexNAc(2)Hex(7)	Q5JTV8	1.34966	1.18423	1.32556
HLNSSHPRHexNAc(2)Hex(8)	Q5JTV8	1	1.38939	1.38316
HLNSSHPRHexNAc(2)Hex(9)	Q5JTV8	1.04237	1.03896	0.949711
HLYTTTGGETDFTNVTSLRHexNAc(2)Hex(10)	Q99523	2.30968	1.77895	1.33961
HLYTTTGGETDFTNVTSLRHexNAc(2)Hex(9)	Q99523	1.43273	1.14531	0.846504
HNMSGGEFQGKHexNAc(2)Hex(9)	Q15648	NA	0.720538	NA
HNNDTQHIWESDSNEFSVIADPRHexNAc(1)	P14625	0.638905	NA	1.22501
HNNDTQHIWESDSNEFSVIADPRHexNAc(2)Hex(10)	P14625	NA	NA	0.840231
HNNDTQHIWESDSNEFSVIADPRHexNAc(2)Hex(5)Fuc(1)	P14625	NA	0.751863	NA
HNNDTQHIWESDSNEFSVIADPRHexNAc(2)Hex(5)	P14625	0.973746	1.02256	0.471021
HNNDTQHIWESDSNEFSVIADPRHexNAc(2)Hex(6)	P14625	1.60658	0.45501	0.249174
HNNDTQHIWESDSNEFSVIADPRHexNAc(2)Hex(7)	P14625	1.26614	0.927989	0.922104
HNNDTQHIWESDSNEFSVIADPRHexNAc(2)Hex(8)	P14625	0.242687	0.575734	0.241922
HNNDTQHIWESDSNEFSVIADPRHexNAc(2)Hex(9)	P14625	1.25543	0.589845	0.918884
HNNDTQHIWESDSNEFSVIADPRHexNAc(3)Hex(3)Fuc(1)	P14625	0.574416	0.569324	0.55523
HNNDTQHIWESDSNEFSVIADPRHexNAc(3)Hex(4)NeuAc(1)	P14625	0.347414	NA	NA
HNNDTQHIWESDSNEFSVIADPRHexNAc(3)Hex(5)	P14625	2.45083	NA	NA
HNNDTQHIWESDSNEFSVIADPRHexNAc(4)Hex(3)Fuc(1)	P14625	0.491839	1.00874	1.96196
HNNDTQHIWESDSNEFSVIADPRHexNAc(5)Hex(3)Fuc(1)	P14625	0.386419	NA	NA
HNNDTQHIWESDSNEFSVIADPRHexNAc(5)Hex(9)Fuc(1)	P14625	0.321195	NA	NA
HNNDTQHIWESDSNEFSVIADPRHexNAc(7)Hex(7)Fuc(1)NeuAc(4)	P14625	NA	NA	2.17745
HNSTGCLRHexNAc(2)Hex(10)	P10909	NA	NA	1.51095
HNSTGCLRHexNAc(2)Hex(6)	P10909	3.16374	NA	NA
HNSTGCLRHexNAc(2)Hex(8)	P10909	1.55922	NA	NA
HNSTGCLRHexNAc(2)Hex(9)	P10909	NA	1.4567	1.42245
HNSTGCLRMKHexNAc(2)Hex(6)	P10909	NA	1	NA
HNSTGCLRMKHexNAc(2)Hex(7)	P10909	NA	1	1.25943
HPCNASMECDKHexNAc(2)Hex(8)	Q9Y3S2	NA	NA	1.17833
HPDASVNFSEFSKHexNAc(2)Hex(9)	P09429	7.27315	NA	NA
HPSCVNVSKHexNAc(2)Hex(9)	Q9UHN6	NA	3.08189	NA
HPSCVNVSKHexNAc(3)Hex(6)NeuAc(1)	Q9UHN6	NA	0.631351	NA
HQGARYVWNRHexNAc(2)Hex(9)	P10696	NA	NA	7.70911
HQGAWYVWNRHexNAc(2)Hex(8)	P09923	1.66508	NA	NA
HQGAWYVWNRHexNAc(2)Hex(9)	P09923	1.51574	NA	NA
HTNMNLTQLKHexNAc(2)Hex(10)	Q15165	NA	NA	2.13287
HTNMNLTQLKHexNAc(2)Hex(7)	Q15165	0.959017	NA	1.23264
HTNMNLTQLKHexNAc(2)Hex(8)	Q15165	1.59235	1	1.65731
HTNMNLTQLKHexNAc(2)Hex(9)	Q15165	NA	NA	1.73485
HTNMNLTQLKHexNAc(6)Hex(3)	Q15165	NA	1.00358	NA
HTNMNLTQLKHexNAc(7)Hex(8)Fuc(1)NeuAc(1)	Q15165	2.94559	NA	NA
HTVFWNSSNPKHexNAc(2)Hex(7)	P20827	1.80026	NA	NA
HTVFWNSSNPKHexNAc(2)Hex(8)	P20827	1.42823	1.62665	1.61014
HTVFWNSSNPKHexNAc(2)Hex(9)	P20827	NA	3.08996	NA
HVVYWNSSNPRHexNAc(2)Hex(8)	P52798	0.679483	NA	NA
HVYNNLTEEQKHexNAc(3)Hex(6)	Q9H6B4	0.135641	NA	NA
HVYNNLTEEQKHexNAc(4)Hex(5)Fuc(1)NeuAc(2)	Q9H6B4	0.193326	0.530555	0.64817
IANETRHexNAc(2)Hex(8)	P08236	0.813666	0.795393	0.898464
IAPASNVSHTVVLRHexNAc(2)Hex(10)	P43308	NA	NA	0.330358
IAPASNVSHTVVLRHexNAc(2)Hex(8)	P43308	NA	1.39978	1.46626
IAPASNVSHTVVLRHexNAc(2)Hex(9)	P43308	1.94789	1.7513	1
IAPASNVSHTVVLRPLKHexNAc(2)Hex(10)	P43308	2.40777	2.82154	2.33122
IAPASNVSHTVVLRPLKHexNAc(2)Hex(7)	P43308	1.92803	NA	NA
IAPASNVSHTVVLRPLKHexNAc(2)Hex(8)	P43308	2.18692	1.89978	2.06302
IAPASNVSHTVVLRPLKHexNAc(2)Hex(9)	P43308	2.06747	1.90434	1.91698
IAPASNVSHTVVLRPLKHexNAc(6)Hex(3)	P43308	0.41705	1.21282	0.98062
IAPASNVSHTVVLRPLKHexNAc(6)Hex(4)	P43308	1.20747	1.0611	1.11593
IAPASNVSHTVVLRPLKHexNAc(6)Hex(5)	P43308	1.29593	1.26728	1.28338
IHNVTASDSGKHexNAc(2)Hex(8)	O00481	1.71694	1.5178	1.45467
IHNVTASDSGKHexNAc(4)Hex(5)Fuc(1)NeuAc(2)	O00481	NA	NA	0.297901
IILNQTARHexNAc(2)Hex(8)	Q6P5S2	NA	0.258225	NA
IILNQTARHexNAc(3)Hex(6)	Q6P5S2	NA	1.37592	NA
IILNQTARHexNAc(4)Hex(5)Fuc(1)	Q6P5S2	NA	0.195094	NA
IILNQTARHexNAc(6)Hex(7)Fuc(1)	Q6P5S2	NA	0.467186	NA
ILGDKVNNTAVIEKHexNAc(2)Hex(8)	Q9H330	1.62651	NA	1.34709
ILLTCSLNDSATEVTGHRHexNAc(2)Hex(8)	P35613	0.66278	0.954529	0.662897
ILLTCSLNDSATEVTGHRHexNAc(2)Hex(9)	P35613	0.726786	0.783257	0.736433
ILLTCSLNDSATEVTGHRHexNAc(4)Hex(5)Fuc(1)NeuAc(2)	P35613	0.117302	NA	NA
ILLTCSLNDSATEVTGHRHexNAc(5)Hex(6)Fuc(1)NeuAc(2)	P35613	0.446252	NA	NA
ILLTCSLNDSATEVTGHRHexNAc(5)Hex(6)Fuc(1)NeuAc(3)	P35613	NA	0.400378	0.298783
ILLTCSLNDSATEVTGHRHexNAc(6)Hex(7)Fuc(1)NeuAc(3)	P35613	NA	0.379184	NA
ILNGSNKHexNAc(2)Hex(8)	Q9UBV2	NA	0.648267	NA
ILNGSNKHexNAc(2)Hex(9)	Q9UBV2	1.36813	1.29452	1.33323
INLNCTQKHexNAc(2)Hex(10)	Q9GZT8	NA	NA	1
INRHexNAc(2)Hex(5)	Q7RTR2	NA	NA	1.02001
INRHexNAc(2)Hex(7)	Q7RTR2	1.18018	NA	NA
INRHexNAc(2)Hex(8)	Q7RTR2	1.16585	NA	1
INRHexNAc(2)Hex(9)	Q7RTR2	1.16983	NA	1
INRHexNAc(5)Hex(5)Fuc(1)NeuAc(2)	Q7RTR2	2.78494	NA	NA
INTTADEKDPTNPFRHexNAc(2)Hex(8)	O14672	0.254222	NA	NA
INTTADEKDPTNPFRHexNAc(2)Hex(9)	O14672	0.832885	0.837654	0.643707
IQNILSEKPTVTTVYANNGSVLQGSSVASVYDGKHexNAc(2)Hex(6)	Q15165	0.882348	3.53976	NA
IQNILSEKPTVTTVYANNGSVLQGSSVASVYDGKHexNAc(2)Hex(7)	Q15165	0.543189	0.79927	0.65547
IQNILSEKPTVTTVYANNGSVLQGSSVASVYDGKHexNAc(2)Hex(8)	Q15165	0.915087	0.553261	1.62486
ISQSGDFLRYHYNGTLLDGTLFDSSYSRHexNAc(9)Hex(10)Fuc(1)	O95302	NA	0.316059	NA
ISSLQTTEKNDTVAGQGERHexNAc(2)Hex(8)	P06756	0.360192	0.537473	0.416525
ISSLQTTEKNDTVAGQGERHexNAc(2)Hex(9)	P06756	NA	NA	0.219408
ITDSEDKALMNGSESRHexNAc(2)Hex(10)	P35613	0.747116	0.38487	0.229251
ITDSEDKALMNGSESRHexNAc(2)Hex(6)	P35613	NA	0.714722	0.651707
ITDSEDKALMNGSESRHexNAc(2)Hex(7)	P35613	NA	1.39133	NA
ITDSEDKALMNGSESRHexNAc(2)Hex(8)	P35613	0.664682	0.60738	1.24858
IYIPLNKHexNAc(2)Hex(10)	Q92542	4.49004	NA	NA
IYIPLNKHexNAc(2)Hex(8)	Q92542	NA	1.32866	NA
IYIPLNKHexNAc(2)Hex(9)	Q92542	3.37808	1.45338	0.781595
IYNKHexNAc(2)Hex(6)	P11387	NA	0.593569	NA
IYNKHexNAc(2)Hex(7)	P11387	NA	1	NA
IYNKHexNAc(2)Hex(8)	P11387	1	1	NA
IYNKHexNAc(2)Hex(9)	P11387	1	1	NA
KCQEAINATCKHexNAc(2)Hex(8)	P78536	1.48292	NA	NA
KDFLARNMTKHexNAc(2)Hex(7)	Q6ZT98	NA	3.053	NA
KDFLARNMTKHexNAc(2)Hex(8)	Q6ZT98	NA	5.24596	NA
KDNTTVTRHexNAc(2)Hex(10)	P11279	0.696952	0.722345	NA
KDNTTVTRHexNAc(2)Hex(3)Fuc(1)	P11279	NA	NA	0.999453
KDNTTVTRHexNAc(2)Hex(7)	P11279	NA	NA	0.413793
KDNTTVTRHexNAc(2)Hex(8)	P11279	NA	NA	0.252633
KDNTTVTRHexNAc(2)Hex(9)	P11279	0.757415	0.805447	0.769259
KDNTTVTRHexNAc(3)Hex(3)Fuc(1)	P11279	NA	0.959894	0.94153
KDNTTVTRHexNAc(3)Hex(4)Fuc(1)	P11279	0.803679	0.908163	0.939784
KDNTTVTRHexNAc(3)Hex(5)Fuc(1)	P11279	0.723512	0.564336	NA
KDNTTVTRHexNAc(4)Hex(4)Fuc(1)	P11279	0.802098	0.747814	0.873869
KDNTTVTRHexNAc(4)Hex(5)Fuc(1)NeuAc(1)	P11279	0.828295	1.27844	0.91835
KDNTTVTRHexNAc(4)Hex(5)Fuc(1)NeuAc(2)	P11279	5.47159	5.4033	6.04044
KDNTTVTRHexNAc(4)Hex(5)Fuc(1)	P11279	0.956693	0.989816	0.87218
KDNTTVTRHexNAc(5)Hex(6)Fuc(1)NeuAc(2)	P11279	NA	0.121038	NA
KDNTTVTRHexNAc(5)Hex(6)Fuc(1)NeuAc(3)	P11279	NA	NA	0.133457
KDNTTVTRHexNAc(5)Hex(6)Fuc(1)	P11279	0.522369	0.812579	0.436599
KDNTTVTRHexNAc(7)Hex(4)Fuc(1)	P11279	NA	NA	4.80586
KDSLNSSHPISSSVQSSEQIEEMFDSLSYFKHexNAc(2)Hex(8)	Q9UIQ6	0.352078	0.39858	NA
KDSLNSSHPISSSVQSSEQIEEMFDSLSYFKHexNAc(2)Hex(9)	Q9UIQ6	0.971145	0.844268	NA
KDTCTQECSYFNITKHexNAc(2)Hex(6)	P05556	0.976354	NA	0.804694
KDTCTQECSYFNITKHexNAc(2)Hex(7)	P05556	1.33966	NA	0.719394
KDTCTQECSYFNITKHexNAc(2)Hex(8)	P05556	1.42348	0.87932	1.03204
KDTCTQECSYFNITKHexNAc(2)Hex(9)	P05556	NA	1.26194	1.74151
KEDALNETRHexNAc(2)Hex(9)	P10909	NA	NA	0.497659
KEENFSSPKHexNAc(2)Hex(5)	Q96SB8	1.95711	NA	NA
KEENFSSPKHexNAc(2)Hex(9)	Q96SB8	2.96784	NA	NA
KFLQKHLNASNPTEPATIIFTAARHexNAc(2)Hex(5)	Q8NFQ8	NA	0.409868	NA
KGDGGGAGGGGGGGGSGGGGSGGGGGGGSSRPPAPQENTTSEAGLPQGEARHexNAc(3)Hex(3)Fuc(1)	Q9UKM9	0.459649	NA	NA
KGDGGGAGGGGGGGGSGGGGSGGGGGGGSSRPPAPQENTTSEAGLPQGEARHexNAc(8)Hex(3)Fuc(1)	Q9UKM9	1.42321	NA	NA
KGTHFVQLCCQRNIPLLFLQNITGFMVGRHexNAc(2)Hex(8)	Q9HCC0	NA	NA	5.11882
KGTHFVQLCCQRNIPLLFLQNITGFMVGRHexNAc(5)Hex(3)Fuc(1)	Q9HCC0	NA	NA	6.82847
KIADDKYNDTFWKHexNAc(2)Hex(7)	P14625	0.413929	3.99063	NA
KIADDKYNDTFWKHexNAc(3)Hex(6)	P14625	1.1816	NA	NA
KIPAINQTITEANEKHexNAc(2)Hex(8)	P11047	0.965171	1.15918	0.918856
KIYIPLNKHexNAc(2)Hex(8)	Q92542	1.30783	1.27248	NA
KIYIPLNKHexNAc(2)Hex(9)	Q92542	1.14886	1.19008	1.61821
KIYIPLNKHexNAc(6)Hex(5)Fuc(1)NeuAc(1)	Q92542	NA	0.557723	NA
KKATDGVTLTGINQTGDQSLPSKHexNAc(5)Hex(8)Fuc(1)	Q9UNF0	1.1598	NA	NA
KKEDALNETRHexNAc(2)Hex(10)	P10909	NA	NA	0.597221
KKEDALNETRHexNAc(2)Hex(7)	P10909	NA	NA	0.801455
KKEDALNETRHexNAc(2)Hex(8)	P10909	1.20712	0.759418	0.80269
KKEDALNETRHexNAc(2)Hex(9)	P10909	0.684588	0.741893	0.849503
KKGDGGGAGGGGGGGGSGGGGSGGGGGGGSSRPPAPQENTTSEAGLPQGEARHexNAc(2)Hex(11)	Q9UKM9	0.982316	1.31598	NA
KKHPDASVNFSEFSKHexNAc(2)Hex(8)	P09429	1.3048	NA	NA
KKHPDASVNFSEFSKHexNAc(2)Hex(9)	P09429	1.05555	NA	1.04976
KKNITKHexNAc(2)Hex(6)	Q6YHK3	NA	1.19881	NA
KKNITKHexNAc(2)Hex(7)	Q6YHK3	NA	1.42198	NA
KKNITKHexNAc(2)Hex(8)	Q6YHK3	NA	1.19107	NA
KKNITKHexNAc(2)Hex(9)	Q6YHK3	NA	NA	1.5955
KKNSTAYFRHexNAc(2)Hex(6)	Q8NBL1	NA	1.30079	NA
KLMAQVNRHexNAc(2)Hex(7)	Q8IZY2	NA	NA	1
KNASNMEYRHexNAc(2)Hex(6)	Q9Y639	1.24895	1.04092	NA
KNASNMEYRHexNAc(2)Hex(7)	Q9Y639	0.921219	0.699162	0.724732
KNASNMEYRHexNAc(2)Hex(8)	Q9Y639	0.735132	0.73202	0.761712
KNASNMEYRHexNAc(2)Hex(9)	Q9Y639	NA	2.04247	2.19763
KNGSDCGSLGKHexNAc(2)Hex(6)	Q9Y6Q3	NA	0.251734	NA
KNGSDCGSLGKHexNAc(2)Hex(7)	Q9Y6Q3	NA	NA	3.60723
KNGSDCGSLGKHexNAc(2)Hex(8)	Q9Y6Q3	NA	NA	7.46706
KNITKHexNAc(2)Hex(7)	Q6YHK3	NA	1.03155	NA
KNITKHexNAc(4)Hex(5)NeuAc(1)	Q6YHK3	NA	1.16741	NA
KNITKHexNAc(7)Hex(8)NeuAc(1)	Q6YHK3	NA	4.97091	NA
KNNTYLVKHexNAc(4)Hex(5)Fuc(1)NeuAc(2)	Q6P4E1	1.12371	NA	NA
KNRHexNAc(4)Hex(5)NeuAc(2)	Q5SSJ5	NA	1	NA
KNSTAYFRHexNAc(2)Hex(6)	Q8NBL1	1.32475	1.33786	1.47867
KNSTAYFRHexNAc(2)Hex(7)	Q8NBL1	NA	1.05755	NA
KNSTAYFRHexNAc(2)Hex(8)	Q8NBL1	NA	NA	1.35438
KNSTAYFRHexNAc(2)Hex(9)	Q8NBL1	NA	NA	1.30309
KNSTTNYRHexNAc(2)Hex(6)	A0JNW5	NA	7.50622	NA
KNSTTNYRHexNAc(2)Hex(7)	A0JNW5	NA	9.57041	NA
KNSTTNYRHexNAc(2)Hex(8)	A0JNW5	NA	NA	5.17045
KNSTTNYRHexNAc(2)Hex(9)	A0JNW5	NA	NA	3.76724
KNVTLILDCKHexNAc(2)Hex(9)	P20908	NA	1.8747	1.2948
KPDPAEQQNVTQVAHSPQGYNTARHexNAc(4)Hex(5)Fuc(1)NeuAc(1)	O00461	NA	0.732593	NA
KPDPAEQQNVTQVAHSPQGYNTARHexNAc(4)Hex(5)Fuc(1)NeuAc(2)	O00461	0.841752	NA	NA
KPQDQGLNHTCNYYLQPEEDVTIGVWHTVPAVWWKHexNAc(2)Hex(8)	Q8N2K0	5.84764	3.72701	1.14016
KPQDQGLNHTCNYYLQPEEDVTIGVWHTVPAVWWKHexNAc(6)Hex(4)	Q8N2K0	1.02848	NA	NA
KQPHGGQQKPSYGSGYQSHQGQQQSYNQSPYSNYGPPQGKHexNAc(6)Hex(3)Fuc(1)	Q12906	0.575926	1.00169	NA
KQPHGGQQKPSYGSGYQSHQGQQQSYNQSPYSNYGPPQGKHexNAc(7)Hex(4)Fuc(1)	Q12906	1.38792	NA	NA
KQPHGGQQKPSYGSGYQSHQGQQQSYNQSPYSNYGPPQGKQKHexNAc(4)Hex(5)NeuAc(1)	Q12906	NA	3.30428	NA
KQPSPTPGNATGGPLPVSAASQAHQASHQPLYLNHP	Q99941	4.11468	4.30238	NA
KRVLNVTNLEFSDTRHexNAc(2)Hex(8)	O75151	NA	0.384832	0.212754
KTNESVSEPRHexNAc(2)Hex(8)	Q13433	0.348262	0.425772	0.483446
KVNGTPSPIPIISWCGSLDSRHexNAc(2)Hex(8)	Q7Z4H8	NA	1.12606	NA
KVQRNITVRHexNAc(2)Hex(8)	P56199	1	1	1
KWGHNITEFQQRHexNAc(2)Hex(6)	Q96HE7	0.741235	1.16764	2.85514
KWGHNITEFQQRHexNAc(2)Hex(8)	Q96HE7	0.505439	0.241356	2.1533
KWGHNITEFQQRHexNAc(2)Hex(9)	Q96HE7	1.3485	1.25379	1.18603
LANNTHQHVFDDLRHexNAc(4)Hex(5)Fuc(1)NeuAc(2)	Q99523	0.107367	NA	0.314127
LCNKHexNAc(2)Hex(7)	P41221	NA	1.10989	1.09164
LCNKHexNAc(6)Hex(5)	P41221	NA	NA	0.965293
LENDTISKHexNAc(2)Hex(8)	Q16204	NA	0.406309	NA
LENITTGTYTIHAQKHexNAc(2)Hex(7)	P69849	0.448727	NA	NA
LENITTGTYTIHAQKHexNAc(2)Hex(8)	P69849	1.22587	1.05436	1.12188
LENITTGTYTIHAQKHexNAc(2)Hex(9)	P69849	0.982096	0.953967	NA
LGVIEDHSNRHexNAc(2)Hex(10)	P14625	NA	NA	0.515775
LGVIEDHSNRHexNAc(2)Hex(8)	P14625	0.878597	0.838684	0.796738
LGVIEDHSNRHexNAc(2)Hex(9)	P14625	0.814279	0.725612	0.552026
LGVIEDHSNRHexNAc(6)Hex(10)Fuc(1)NeuAc(1)	P14625	NA	0.130216	NA
LIDNNKHexNAc(2)Hex(6)	P07602	NA	0.694295	NA
LIDNNKHexNAc(2)Hex(8)	P07602	1.01733	0.740981	NA
LIDNNKTEKHexNAc(2)Hex(5)Fuc(1)	P07602	2.1366	2.00576	1.8465
LIDNNKTEKHexNAc(2)Hex(5)	P07602	0.864455	0.951175	1.09133
LIDNNKTEKHexNAc(2)Hex(6)	P07602	1.17296	0.783169	0.856274
LIDNNKTEKHexNAc(2)Hex(7)	P07602	0.744585	0.525194	0.863469
LIDNNKTEKHexNAc(2)Hex(8)	P07602	0.725023	0.845289	0.855578
LIDNNKTEKHexNAc(2)Hex(9)	P07602	0.892527	0.745279	0.740341
LINRHexNAc(2)Hex(8)	Q8TEP8	NA	1.26452	1.25691
LINRHexNAc(2)Hex(9)	Q8TEP8	NA	1.36244	1.34583
LKVPESENNKHexNAc(2)Hex(6)	Q5JRA6	1.00182	1.019	0.783263
LKVPESENNKHexNAc(2)Hex(7)	Q5JRA6	NA	0.674084	0.749664
LKVPESENNKHexNAc(2)Hex(8)	Q5JRA6	0.958832	0.861878	1.04588
LLHAYNRHexNAc(2)Hex(10)	Q13214	NA	1.07514	NA
LLHAYNRHexNAc(2)Hex(8)	Q13214	NA	1.12215	NA
LLHAYNRHexNAc(2)Hex(9)	Q13214	NA	1.57189	NA
LLIAGTNSSDLQQILSLLESNKHexNAc(6)Hex(8)Fuc(1)NeuAc(1)	P08195	1.49214	NA	NA
LLNGSQRHexNAc(2)Hex(7)	Q32P28	NA	1.56584	NA
LLNGSQRHexNAc(2)Hex(8)	Q32P28	NA	1.71582	1.44485
LLNGSQRHexNAc(2)Hex(9)	Q32P28	NA	1.51624	NA
LLNINPNKHexNAc(2)Hex(7)	P11279	2.63223	2.73334	2.47977
LLNINPNKHexNAc(2)Hex(8)	P11279	1.89294	1.71638	1.12484
LLNINPNKHexNAc(2)Hex(9)	P11279	1.68902	1.80964	2.22441
LLNINPNKHexNAc(3)Hex(6)	P11279	0.80099	0.893385	0.588291
LLNINPNKHexNAc(4)Hex(5)Fuc(1)	P11279	1.67709	1.70228	1.67703
LLNINPNKHexNAc(5)Hex(6)Fuc(1)	P11279	1.2868	1.36092	1.58386
LLNINPNKHexNAc(6)Hex(5)	P11279	0.895252	NA	NA
LLNINPNKHexNAc(6)Hex(7)Fuc(1)	P11279	NA	2.13753	2.12293
LLNNLTSIKHexNAc(2)Hex(9)	P11047	2.03239	NA	NA
LLRDSEAFCHRNCSAAPQPEPAAGLASYPELRHexNAc(4)Hex(3)NeuAc(1)	O75718	0.57199	NA	NA
LLSASAHQNVTYHCYQSVAWQDAATGSYDKHexNAc(2)Hex(9)	P20908	NA	1.74828	0.998091
LLSNRHexNAc(2)Hex(10)	P54289	0.924808	NA	NA
LLSNRHexNAc(2)Hex(8)	P54289	0.530283	1	NA
LLSNRHexNAc(2)Hex(9)	P54289	0.586172	0.602677	NA
LLSTANYNTSHYNNDLWQIFENPVDWKHexNAc(2)Hex(9)	O00469	0.382408	0.482315	0.359901
LLSTANYNTSHYNNDLWQIFENPVDWKHexNAc(6)Hex(4)	O00469	NA	NA	0.534312
LLSTEGSQNITYHCKHexNAc(2)Hex(8)	P02458	1.40995	0.852259	0.958136
LNGTKHexNAc(2)Hex(7)	P23229	1.44111	NA	NA
LNGTKHexNAc(2)Hex(8)	P23229	1.328	1.28772	NA
LNGTKHexNAc(2)Hex(9)	P23229	1.38063	NA	1.52009
LNITCESSKHexNAc(2)Hex(8)	Q4KMQ2	NA	0.497931	NA
LNLTTDPKHexNAc(2)Hex(8)	Q92896	0.982899	NA	0.49006
LNLTTDPKHexNAc(2)Hex(9)	Q92896	NA	NA	1.07891
LNPNASRKHexNAc(2)Hex(6)	Q9ULX3	0.187253	NA	NA
LNPNASRKHexNAc(2)Hex(7)	Q9ULX3	0.347854	0.278909	0.40072
LNPNASRKHexNAc(2)Hex(8)	Q9ULX3	0.42522	0.50405	0.459037
LNRHexNAc(2)Hex(5)	Q96PC5	8.85705	NA	1.02001
LNRHexNAc(2)Hex(7)	Q9UHC3	1.18018	NA	NA
LNRHexNAc(2)Hex(8)	Q96PC5	1	NA	1.40987
LNRHexNAc(2)Hex(9)	Q96PC5	0.942039	NA	1.34979
LNRHexNAc(4)Hex(5)Fuc(1)NeuAc(2)	Q96PC5	1	NA	NA
LNRHexNAc(5)Hex(5)Fuc(1)NeuAc(2)	Q9UHC3	2.78494	NA	NA
LNRHexNAc(5)Hex(5)NeuAc(1)	Q96PC5	1	NA	NA
LNRHexNAc(5)Hex(6)NeuAc(2)	Q96PC5	6.84794	NA	NA
LNSSSQTNSLKHexNAc(2)Hex(8)	Q15818	1.19399	1.39386	0.729258
LNSSTIKHexNAc(2)Hex(9)	P13473	0.574921	NA	0.740186
LNSSTIKHexNAc(4)Hex(5)Fuc(1)NeuAc(2)	P13473	1	NA	NA
LNSSTIKHexNAc(4)Hex(5)NeuAc(1)	P13473	1.0926	1.20088	1.18386
LNSSTIKHexNAc(4)Hex(5)	P13473	0.873748	3.73805	0.910328
LNSSTIKHexNAc(5)Hex(6)NeuAc(1)	P13473	0.638525	0.679879	0.666015
LNSSTIKHexNAc(5)Hex(6)	P13473	2.04783	1.22846	1.41771
LNSSTIKHexNAc(6)Hex(7)NeuAc(2)	P13473	NA	NA	1.12124
LPENYTDETWQKHexNAc(2)Hex(10)	Q13620	NA	1.84925	NA
LRNPCTSEQNCTSPFSYKHexNAc(2)Hex(7)	P05556	0.995113	NA	0.919672
LRNPCTSEQNCTSPFSYKHexNAc(2)Hex(8)	P05556	1.11706	1.42443	NA
LRNPCTSEQNCTSPFSYKHexNAc(2)Hex(9)	P05556	0.91518	0.871263	0.769161
LSAVNSIFLSHNNTKHexNAc(4)Hex(5)Fuc(1)NeuAc(2)	P48960	NA	NA	1.22043
LSDTTSQSNSTAKHexNAc(2)Hex(6)	P07942	1.02963	1.23057	1.21257
LSDTTSQSNSTAKHexNAc(2)Hex(7)	P07942	0.739815	0.738361	NA
LSDTTSQSNSTAKHexNAc(2)Hex(8)	P07942	0.937882	NA	0.888445
LSEIHKDQPGHPVNRHexNAc(2)Hex(8)	Q16880	0.502881	0.521073	0.982706
LSHDANETLPLHLYVKHexNAc(4)Hex(5)Fuc(1)NeuAc(2)	O15031	0.109957	NA	NA
LSPIHIALNFSLDPQAPVDSHGLRPALHYQSKHexNAc(2)Hex(8)	P08648	0.421185	1.42675	NA
LSPIHIALNFSLDPQAPVDSHGLRPALHYQSKHexNAc(2)Hex(9)	P08648	0.646172	1.34387	1.13455
LTHLHEGLPVKNGTRHexNAc(4)Hex(4)NeuAc(1)	O00469	0.792114	0.942749	0.972786
LVALAVIDEKNTSVEHTRHexNAc(2)Hex(7)	Q96JJ7	NA	1.16731	NA
LVALAVIDEKNTSVEHTRHexNAc(2)Hex(8)	Q96JJ7	1.39544	0.862436	1.0249
LVALAVIDEKNTSVEHTRHexNAc(2)Hex(9)	Q96JJ7	0.445496	0.465034	0.822148
LVIHSLDYSDQGNYSCVASTELDVVESRHexNAc(2)Hex(9)	P32004	NA	0.99613	0.767903
MCLNRHexNAc(2)Hex(7)	Q13510	NA	NA	9.15132
MEICSGSNKHexNAc(4)Hex(5)Fuc(1)NeuAc(2)	Q15648	0.269655	0.235827	0.225141
MFSNCSKHexNAc(2)Hex(8)	P78536	NA	NA	1.81811
MLLQNYSKHexNAc(6)Hex(6)Fuc(1)NeuAc(1)	Q86UK5	6.02243	NA	NA
MNITVKHexNAc(2)Hex(10)	P26006	4.92863	3.89769	3.66274
MNITVKHexNAc(2)Hex(8)	P26006	NA	NA	0.307143
MNITVKHexNAc(2)Hex(9)	P26006	NA	1.69556	NA
MNITVKHexNAc(5)Hex(6)Fuc(1)NeuAc(3)	P26006	NA	NA	1.59557
MTAMDNASKHexNAc(2)Hex(7)	P36542	0.443003	NA	NA
MYSEGSDIVPQSNETALHYFKHexNAc(2)Hex(9)	Q9UBV2	4.50355	1.60555	4.29253
NAKSSGNSSSSGSGSGSTSAGSSSPGARHexNAc(2)Hex(3)Fuc(1)	Q12797	2.45484	NA	NA
NALNLTFHAQNVGEGGAYEAELRHexNAc(2)Hex(7)	P08648	0.588513	1.28192	2.32391
NALNLTFHAQNVGEGGAYEAELRHexNAc(2)Hex(8)	P08648	0.838855	1.15101	0.900089
NASEMIDKHexNAc(2)Hex(9)	P36542	NA	NA	9.46395
NASNMEYRINKHexNAc(2)Hex(8)	Q9Y639	NA	1.02347	NA
NATRHexNAc(5)Hex(4)NeuAc(2)	P11279	0.270985	NA	NA
NATRHexNAc(5)Hex(6)Fuc(1)NeuAc(3)	P11279	NA	0.944359	NA
NATRHexNAc(6)Hex(8)Fuc(1)NeuAc(1)	P11279	NA	NA	0.589486
NATRHexNAc(7)Hex(4)	P11279	NA	1.68625	NA
NATYGYVLDDPDPDDGFNYKHexNAc(2)Hex(8)	O43852	2.00222	1.39276	NA
NCSAAPQPEPAAGLASYPELRHexNAc(2)Hex(7)	O75718	NA	NA	0.91448
NCSAAPQPEPAAGLASYPELRHexNAc(2)Hex(8)	O75718	0.740533	NA	NA
NCSFQPERHexNAc(2)Hex(8)	O15031	1.33356	NA	NA
NCSFQPERHexNAc(2)Hex(9)	O15031	0.722557	NA	3.74167
NDTEERHexNAc(2)Hex(6)	Q15818	0.446143	0.446609	0.406512
NDTEERHexNAc(2)Hex(8)	Q15818	0.754223	0.626904	NA
NDTKHexNAc(6)Hex(6)Fuc(1)	P67809	NA	1.86523	NA
NDTLQEAKHexNAc(2)Hex(8)	Q92896	0.502053	NA	0.774742
NDTLQEAKHexNAc(2)Hex(9)	Q92896	1.08442	NA	NA
NDTLQEAKHexNAc(4)Hex(5)Fuc(1)NeuAc(2)	Q92896	NA	0.107131	0.159455
NDTLQEAKHexNAc(4)Hex(5)NeuAc(2)	Q92896	NA	NA	2.48659
NESDKAPWPLSLPGCPHRHexNAc(2)Hex(6)	P11117	0.989428	0.832223	1.13087
NESDKAPWPLSLPGCPHRHexNAc(2)Hex(7)	P11117	0.66038	0.764378	1.04393
NESDKHexNAc(7)Hex(7)Fuc(1)NeuAc(3)	P11117	NA	0.980535	NA
NESEFRHexNAc(7)Hex(7)Fuc(1)NeuAc(3)	P08648	3.18722	NA	NA
NESTGSLGTQGRHexNAc(2)Hex(10)	P41221	0.909396	0.889337	0.874538
NESTGSLGTQGRHexNAc(2)Hex(7)	P41221	NA	0.521173	0.719845
NESTGSLGTQGRHexNAc(2)Hex(8)	P41221	0.998998	0.821447	0.666818
NESTGSLGTQGRHexNAc(2)Hex(9)	P41221	1.11859	0.842226	0.907647
NESVRHexNAc(2)Hex(8)	Q92542	0.885876	3.99761	5.07191
NESVRHexNAc(2)Hex(9)	Q92542	2.67563	4.53207	3.5985
NESVRHexNAc(5)Hex(5)Fuc(1)NeuAc(1)	Q92542	NA	NA	0.526242
NESVRHexNAc(6)Hex(7)Fuc(1)NeuAc(2)	Q92542	NA	NA	0.498585
NESVRHexNAc(9)Hex(9)Fuc(1)	Q92542	1.36848	1.57351	NA
NFSSCSAEDFEKHexNAc(2)Hex(8)	Q13443	0.829839	2.02753	1.62088
NFTMNEKHexNAc(2)Hex(10)	Q92820	NA	NA	4.02479
NFTMNEKHexNAc(2)Hex(7)	Q92820	NA	NA	1.25389
NGPPPPNMTTNERHexNAc(2)Hex(6)	Q01543	NA	1.49884	NA
NGPPPPNMTTNERHexNAc(2)Hex(7)	Q01543	NA	0.78142	NA
NGPPPPNMTTNERHexNAc(2)Hex(8)	Q01543	NA	1.82021	NA
NHSIFLADINQERGINESYKKHexNAc(4)Hex(5)NeuAc(1)	P50897	NA	0.122809	NA
NHSIFLADINQERHexNAc(2)Hex(10)	P50897	0.843674	0.850462	0.897282
NHSIFLADINQERHexNAc(2)Hex(6)	P50897	NA	0.362772	NA
NHSIFLADINQERHexNAc(2)Hex(7)	P50897	0.680912	1.01936	1.03194
NHSIFLADINQERHexNAc(2)Hex(8)	P50897	NA	0.861652	NA
NHSIFLADINQERHexNAc(2)Hex(9)	P50897	0.734672	0.776902	0.707185
NHSSYLGYSVAAISTGESTHFVAGAPRHexNAc(2)Hex(8)	P17301	1.9318	1.28715	2.54827
NHTYNTYIGQGYIIPGMDQGLQGACMGERHexNAc(2)Hex(7)	Q96AY3	1.02943	0.956935	1.68534
NHTYNTYIGQGYIIPGMDQGLQGACMGERHexNAc(2)Hex(8)	Q96AY3	0.557473	0.918073	1.23967
NIITNLSKHexNAc(2)Hex(6)	P11387	NA	2.32842	NA
NIITNLSKHexNAc(2)Hex(7)	P11387	3.95686	NA	2.2603
NIITNLSKHexNAc(2)Hex(8)	P11387	1.3905	1.885	NA
NISGHIYNQNVSQKHexNAc(2)Hex(6)	Q9P0T7	1.81072	NA	1.78887
NISGHIYNQNVSQKHexNAc(2)Hex(7)	Q9P0T7	1.15743	NA	1.75365
NISGVVLADHSGAFHNKHexNAc(2)Hex(7)	Q92542	NA	2.17162	NA
NISGVVLADHSGAFHNKHexNAc(2)Hex(8)	Q92542	1.03534	1.27175	1.15257
NISGVVLADHSGAFHNKHexNAc(2)Hex(9)	Q92542	1.06267	0.809299	0.785844
NISGVVLADHSGAFHNKHexNAc(3)Hex(4)Fuc(1)NeuAc(1)	Q92542	NA	NA	0.679925
NISQDLEKHexNAc(2)Hex(8)	P11047	0.865429	0.558848	0.768638
NISRHexNAc(2)Hex(10)	Q96HE7	NA	NA	1.0768
NISRHexNAc(2)Hex(8)	Q96HE7	1	0.992069	1.17115
NISRHexNAc(2)Hex(9)	Q96HE7	1	1	2.76921
NISVAEVEKHexNAc(2)Hex(8)	Q99707	NA	NA	0.195466
NISVETASLDVYAKHexNAc(11)Hex(11)NeuAc(1)	Q93074	7.12434	1.86642	NA
NITLRHexNAc(2)Hex(10)	Q9UHN6	NA	0.609299	NA
NITLRHexNAc(2)Hex(9)	Q9UHN6	NA	0.597829	NA
NITLRHexNAc(6)Hex(7)Fuc(1)NeuAc(2)	Q9UHN6	NA	NA	0.780196
NITVRHexNAc(2)Hex(8)	P56199	NA	NA	1
NITVRHexNAc(2)Hex(9)	P56199	1.07183	NA	NA
NITVRHexNAc(6)Hex(5)Fuc(1)NeuAc(2)	P56199	NA	1	NA
NKHexNAc(5)Hex(5)NeuAc(2)	Q4KMQ2	NA	2.61304	NA
NKHexNAc(5)Hex(6)NeuAc(1)	Q4KMQ2	NA	1	NA
NKHexNAc(6)Hex(5)Fuc(1)NeuAc(3)	Q4KMQ2	NA	0.877014	NA
NKHexNAc(6)Hex(6)Fuc(1)NeuAc(3)	Q4KMQ2	NA	3.49784	NA
NKHexNAc(6)Hex(8)Fuc(1)NeuAc(1)	Q4KMQ2	NA	0.355748	NA
NKHexNAc(8)Hex(9)Fuc(1)NeuAc(3)	Q4KMQ2	NA	2.55778	NA
NKNVTNRHexNAc(2)Hex(8)	P05556	1.32219	1.30462	NA
NKNVTNRHexNAc(2)Hex(9)	P05556	NA	1.10777	1.35475
NLEKNSTKHexNAc(2)Hex(3)Fuc(1)	P07602	NA	0.894301	NA
NLEKNSTKHexNAc(2)Hex(4)Fuc(1)	P07602	0.892991	1.06071	0.837839
NLEKNSTKHexNAc(2)Hex(4)	P07602	1.24787	1.06732	1.42109
NLEKNSTKHexNAc(2)Hex(5)Fuc(1)	P07602	1.05904	1.05005	1.09072
NLEKNSTKHexNAc(2)Hex(5)	P07602	0.945536	1.1175	0.80838
NLEKNSTKHexNAc(2)Hex(6)	P07602	0.986532	0.992257	0.846955
NLEKNSTKHexNAc(2)Hex(7)	P07602	0.661415	0.621516	0.697242
NLEKNSTKHexNAc(4)Hex(4)Fuc(1)NeuAc(1)	P07602	5.4746	NA	NA
NLEKNSTKQEILAALEKHexNAc(2)Hex(6)	P07602	0.832202	NA	1.80104
NLGNNTKHexNAc(2)Hex(6)	Q16880	0.213064	NA	NA
NLGNNTKHexNAc(2)Hex(7)	Q16880	1.10411	NA	1.20125
NLGNNTKHexNAc(2)Hex(8)	Q16880	NA	1.10054	1.12604
NLGNNTKHexNAc(2)	Q16880	0.306855	NA	NA
NLGNNTKHexNAc(4)Hex(3)Fuc(1)	Q16880	NA	0.98658	NA
NLGNNTKHexNAc(6)Hex(6)	Q16880	0.24438	NA	NA
NLNMSRHexNAc(2)Hex(8)	P38571	1.02574	NA	NA
NLNMSRHexNAc(2)Hex(9)	P38571	1.17354	NA	NA
NLNRHexNAc(2)Hex(7)	Q6ZXV5	NA	NA	0.927404
NLNRHexNAc(2)Hex(8)	Q6ZXV5	NA	NA	1.18937
NLQVYNATSNSLTVKHexNAc(2)Hex(9)	Q99715	NA	0.902165	1.03227
NLSGPDKHexNAc(5)Hex(4)NeuAc(2)	Q6EMK4	NA	NA	2.73569
NLSGPDKRHexNAc(2)Hex(7)	Q6EMK4	NA	NA	0.510727
NLSGPDKRHexNAc(2)Hex(8)	Q6EMK4	NA	NA	1.08446
NLTRHexNAc(2)Hex(9)	Q14999	NA	0.786786	NA
NLTVCPDGALFEQKHexNAc(2)Hex(8)	P54709	NA	0.906307	NA
NLTVCPDGALFEQKHexNAc(6)Hex(3)	P54709	NA	0.980947	NA
NMSFVNDLTVTQDGRHexNAc(2)Hex(8)	Q9HDC9	0.79219	1.12048	0.605694
NMSFVNDLTVTQDGRKHexNAc(2)Hex(8)	Q9HDC9	NA	0.713566	0.609533
NMTFDLPSDATVVLNRHexNAc(4)Hex(6)NeuAc(1)	P11279	NA	1.53933	NA
NMTFDLPSDATVVLNRHexNAc(8)Hex(4)	P11279	1.5949	NA	NA
NMTISRHexNAc(4)Hex(5)Fuc(1)NeuAc(2)	P06756	NA	0.991429	NA
NMTISRHexNAc(5)Hex(5)NeuAc(1)	P06756	NA	1	NA
NMTRHexNAc(2)Hex(6)	Q14697	1.25934	NA	NA
NMTRHexNAc(2)Hex(8)	Q14697	1.32877	NA	NA
NMTRHexNAc(2)Hex(9)	Q14697	1	NA	NA
NMTRHexNAc(5)Hex(6)NeuAc(3)	Q14697	1.20132	NA	NA
NMTRHexNAc(5)Hex(7)Fuc(1)NeuAc(2)	Q14697	1.82076	NA	NA
NNGTLYAYIFLHHAGVLPWHDGKHexNAc(2)Hex(8)	Q96KA5	1.44714	1.32826	1.29772
NNHTASILDRHexNAc(2)Hex(10)	P08962	0.90719	1.09673	1.03348
NNHTASILDRHexNAc(2)Hex(11)	P08962	0.288095	NA	NA
NNHTASILDRHexNAc(2)Hex(6)	P08962	NA	1.18521	0.940127
NNHTASILDRHexNAc(2)Hex(7)	P08962	1.35317	1.17241	NA
NNHTASILDRHexNAc(2)Hex(8)	P08962	1.15168	0.873445	0.858688
NNHTASILDRHexNAc(2)Hex(9)	P08962	0.982645	1.01704	0.864056
NNHTASILDRHexNAc(4)Hex(5)Fuc(1)NeuAc(1)	P08962	NA	NA	0.601792
NNHTASILDRHexNAc(4)Hex(5)Fuc(1)	P08962	NA	0.11102	NA
NNHTASILDRHexNAc(5)Hex(6)Fuc(1)NeuAc(1)	P08962	0.332115	0.413779	NA
NNHTASILDRHexNAc(5)Hex(6)Fuc(1)NeuAc(2)	P08962	NA	0.607254	0.430904
NNHTASILDRHexNAc(5)Hex(6)Fuc(1)	P08962	0.754848	NA	NA
NNHTASILDRHexNAc(6)Hex(6)NeuAc(1)	P08962	NA	NA	1.29624
NNHTASILDRHexNAc(6)Hex(7)Fuc(1)NeuAc(1)	P08962	0.221643	NA	0.225168
NNHTASILDRHexNAc(6)Hex(7)Fuc(1)	P08962	NA	NA	0.913551
NNISLVKHexNAc(2)Hex(10)	Q9UHN6	NA	2.24181	1.96975
NNISLVKHexNAc(2)Hex(9)	Q9UHN6	1.40421	1.46196	1.36001
NNSNNFDLNRHexNAc(2)Hex(10)	O75976	NA	2.05715	NA
NNSNNFDLNRHexNAc(2)Hex(6)	O75976	1.03112	0.745041	1.37082
NNSNNFDLNRHexNAc(2)Hex(7)	O75976	NA	NA	1.17314
NNSNNFDLNRHexNAc(2)Hex(9)	O75976	NA	1.01271	1.18522
NNSNNFDLNRHexNAc(3)Hex(6)NeuAc(1)	O75976	0.237827	NA	NA
NNSNNFDLNRHexNAc(3)Hex(6)	O75976	0.732825	NA	NA
NNSNNFDLNRHexNAc(5)Hex(7)	O75976	NA	NA	4.38865
NPCTSEQNCTSPFSYKHexNAc(2)Hex(7)	P05556	NA	0.686113	NA
NPCTSEQNCTSPFSYKHexNAc(2)Hex(8)	P05556	0.708781	1.38977	NA
NPCTSEQNCTSPFSYKHexNAc(2)Hex(9)	P05556	NA	NA	0.966956
NPVGLIGAENATGETDPSHSKHexNAc(2)Hex(8)	P43251	NA	1.64387	NA
NQNESVSEIGGKHexNAc(2)Hex(10)	Q68CR1	NA	0.886781	NA
NQNESVSEIGGKHexNAc(2)Hex(8)	Q68CR1	NA	0.511326	0.783022
NQNESVSEIGGKHexNAc(2)Hex(9)	Q68CR1	0.846623	0.846561	1.02702
NQNGTFKHexNAc(2)Hex(7)	Q9NUN5	0.952874	NA	NA
NQSVPLSCCRHexNAc(2)Hex(7)	O60637	NA	NA	1.05735
NQSVPLSCCRHexNAc(3)Hex(5)Fuc(1)	O60637	1.49972	1.1283	1.10075
NQSVPLSCCRHexNAc(3)Hex(5)	O60637	NA	NA	1.45956
NQSVPLSCCRHexNAc(3)Hex(6)	O60637	1.14312	NA	0.850968
NQTAVRHexNAc(2)Hex(5)	Q13443	0.766856	NA	0.742637
NQTAVRHexNAc(2)Hex(7)	Q13443	NA	0.872955	NA
NQTAVRHexNAc(2)Hex(9)	Q13443	1.15191	NA	NA
NQTAVRHexNAc(6)Hex(4)NeuAc(1)	Q13443	3.01562	NA	NA
NQTLAGEYFHKHexNAc(2)Hex(10)	Q68CR1	0.786224	0.949967	0.865528
NQTLAGEYFHKHexNAc(2)Hex(9)	Q68CR1	0.517919	0.492194	0.625031
NQTLRHexNAc(2)Hex(7)	P38435	NA	1.42527	NA
NQTLRHexNAc(2)Hex(8)	P38435	NA	NA	1.4398
NSSDEEKHexNAc(6)Hex(5)Fuc(1)NeuAc(3)	A0MZ66	1.93185	NA	NA
NSSVEAFKHexNAc(2)Hex(9)	P42892	0.793237	0.914039	NA
NSSVEAFKRHexNAc(2)Hex(8)	P42892	NA	0.460913	0.206093
NSSVEAFKRHexNAc(2)Hex(9)	P42892	NA	NA	0.607385
NSTAVWRHexNAc(2)Hex(8)	Q6UW63	NA	NA	1.76238
NSTAYFRHexNAc(2)Hex(8)	Q8NBL1	NA	0.938265	1.08032
NSTIEAANLAGLKHexNAc(2)Hex(8)	P48723	NA	0.294415	NA
NSTKQEILAALEKHexNAc(2)Hex(6)	P07602	1.03265	0.849864	0.782438
NSTKQEILAALEKHexNAc(2)Hex(7)	P07602	1.17409	1.18531	0.604586
NSTVAIKSRHexNAc(2)Hex(8)	Q9UPP5	NA	1	NA
NTSEVKHexNAc(5)Hex(3)Fuc(1)NeuAc(1)	O43303	5.78223	NA	NA
NTSEVKHexNAc(5)Hex(6)NeuAc(2)	O43303	6.31413	NA	NA
NTSVEHTRHexNAc(2)Hex(6)	Q96JJ7	NA	2.09801	1.43261
NTSVEHTRHexNAc(2)Hex(7)	Q96JJ7	0.61254	0.720081	NA
NTSVEHTRHexNAc(2)Hex(8)	Q96JJ7	0.729451	0.960193	0.739994
NTSVEHTRHexNAc(2)Hex(9)	Q96JJ7	1.20507	NA	NA
NTSWDNAGFKHexNAc(2)Hex(8)	P78536	NA	0.789243	1.12229
NTTFNVESTKHexNAc(2)Hex(7)	P56199	NA	0.634083	0.602037
NTTFNVESTKHexNAc(2)Hex(8)	P56199	0.983912	0.944999	0.915909
NTTFNVESTKHexNAc(3)Hex(5)NeuAc(1)	P56199	NA	NA	0.374737
NTTFNVESTKKHexNAc(2)Hex(8)	P56199	1.17665	NA	1.72046
NVSGFPQYPTGQEKHexNAc(7)Hex(8)Fuc(1)NeuAc(4)	Q9UGU0	0.568834	NA	NA
NVSLLFTTVTTLLTILFYSGTALLNFVLSLIIFLTTLFYLLSSSDEYYKHexNAc(2)Hex(3)	Q9H330	NA	4.51176	NA
NVSTNVFFKHexNAc(5)Hex(6)Fuc(1)NeuAc(3)	Q6YHK3	NA	1.55695	NA
NVTHHVSVTKHexNAc(2)Hex(4)	O94901	1.55253	NA	NA
NVTHHVSVTKHexNAc(2)Hex(5)	O94901	0.648851	NA	0.95431
NVTHHVSVTKHexNAc(2)Hex(6)	O94901	1.21988	NA	1.31287
NVTHHVSVTKHexNAc(2)Hex(7)	O94901	1.68901	NA	NA
NVTHHVSVTKHexNAc(2)Hex(8)	O94901	1.53118	1	1
NVTHHVSVTKHexNAc(2)Hex(9)	O94901	NA	1.04758	NA
NVTHHVSVTKHexNAc(6)Hex(6)Fuc(1)NeuAc(1)	O94901	NA	NA	1
NVTHLLQQELTEAQKHexNAc(2)Hex(8)	Q10589	NA	0.758326	0.870519
NVTHLLQQELTEAQKHexNAc(7)Hex(8)Fuc(1)	Q10589	NA	0.1164	NA
NVTHSGRHexNAc(2)Hex(6)	Q9H330	1.23975	NA	0.992016
NVTHSGRHexNAc(2)Hex(7)	Q9H330	NA	1.41505	NA
NVTHSGRHexNAc(2)Hex(8)	Q9H330	1.30765	1.54002	NA
NVTHSGRHexNAc(2)Hex(9)	Q9H330	1.28859	NA	1.47257
NVTMGQSSARHexNAc(6)Hex(4)NeuAc(1)	P48960	1.62721	NA	NA
NVTMGQSSARHexNAc(7)Hex(3)Fuc(1)	P48960	NA	NA	1.68585
NVTNRHexNAc(2)Hex(8)	P05556	1	1	1.1774
NVTNRHexNAc(7)Hex(8)Fuc(1)NeuAc(4)	P05556	1	NA	NA
NVTRHexNAc(2)Hex(10)	P05556	1.32962	1.28815	1.29615
NVTRHexNAc(2)Hex(7)	P05556	1.07204	0.967163	1.19756
NVTRHexNAc(2)Hex(8)	P05556	1.29425	1.15681	NA
NVTRHexNAc(2)Hex(9)	P05556	1.29922	1.36699	1.24285
NVTRHexNAc(3)Hex(6)NeuAc(1)	P05556	1.96313	NA	NA
NVTRHexNAc(4)Hex(5)NeuAc(1)	P05556	0.381142	0.378981	1
NVTRHexNAc(4)Hex(5)	P05556	0.878232	NA	NA
NVTRHexNAc(4)Hex(7)	P05556	NA	7.73745	NA
NVTRHexNAc(5)Hex(4)Fuc(1)NeuAc(2)	P05556	NA	NA	1.19219
NVTRHexNAc(5)Hex(5)NeuAc(2)	P05556	NA	0.157019	NA
NVTRHexNAc(6)Hex(6)Fuc(1)NeuAc(1)	P05556	NA	NA	1.72654
NVTRHexNAc(6)Hex(6)Fuc(1)NeuAc(3)	P05556	NA	NA	3.08726
NVTRHexNAc(6)Hex(7)NeuAc(3)	P05556	NA	1	NA
NVTVKHexNAc(2)Hex(9)	O75976	NA	NA	0.47991
NVTVKHexNAc(4)Hex(5)Fuc(1)NeuAc(2)	O75976	1.68449	0.765541	4.90104
NVTVKHexNAc(4)Hex(6)NeuAc(1)	O75976	NA	1	NA
NVTVKHexNAc(6)Hex(5)Fuc(1)NeuAc(2)	O75976	1.07134	NA	NA
NVTWKHexNAc(2)Hex(7)	P50454	1	1.30632	1.1882
NVTWKHexNAc(2)Hex(8)	P50454	1.31418	1.42373	1
NVTWKHexNAc(2)Hex(9)	P50454	1.67345	1	1
NVTWKHexNAc(6)Hex(4)	P50454	NA	1.08853	NA
NVTWKHexNAc(6)Hex(5)	P50454	2.76157	NA	NA
NVTWKHexNAc(6)Hex(6)Fuc(1)NeuAc(1)	P50454	NA	3.27458	NA
NVTWKHexNAc(7)Hex(6)	P50454	NA	1.3315	NA
NVTWKHexNAc(7)Hex(7)Fuc(1)NeuAc(2)	P50454	NA	NA	1
NVTWKHexNAc(8)Hex(9)Fuc(1)NeuAc(4)	P50454	NA	1.5765	NA
NWSLSQVNVSHARHexNAc(2)Hex(6)	P55291	NA	1	1
NWSLSQVNVSHARHexNAc(2)Hex(8)	P55291	NA	1	NA
NWSLSQVNVSHARHexNAc(2)Hex(9)	P55291	NA	1	NA
NWTITRHexNAc(2)Hex(8)	P19022	1.38512	1.22404	1.40683
NWTITRHexNAc(2)Hex(9)	P19022	1.12241	NA	1.1394
NWTITRHexNAc(4)Hex(5)Fuc(1)NeuAc(1)	P19022	0.255182	NA	NA
NYFHYNQSYPPTYNVKHexNAc(2)Hex(8)	P38571	2.12223	NA	NA
NYFHYNQSYPPTYNVKHexNAc(6)Hex(4)	P38571	0.809337	NA	NA
NYSDTPPTSKHexNAc(2)Hex(6)	Q9GZX9	0.5095	0.956283	0.502488
NYSDTPPTSKHexNAc(2)Hex(7)	Q9GZX9	0.690842	NA	NA
NYSDTPPTSKHexNAc(2)Hex(8)	Q9GZX9	0.822125	1.39354	0.868182
NYSEVCKHexNAc(2)Hex(8)	Q86WC4	NA	NA	0.88541
NYTADYDKHexNAc(2)Hex(6)	O75477	1.23548	NA	1.62431
NYTADYDKHexNAc(2)Hex(7)	O75477	2.21283	NA	1.45051
NYTADYDKHexNAc(2)Hex(8)	O75477	0.973263	NA	0.911974
NYTADYDKHexNAc(2)Hex(9)	O75477	0.830105	1.05353	1.1644
NYTADYDKHexNAc(8)Hex(8)Fuc(1)	O75477	NA	NA	0.418244
NYTADYDKHexNAc(8)Hex(9)Fuc(1)NeuAc(4)	O94905	NA	0.69262	NA
NYTMEWYELFQLGNCTFPHLRHexNAc(2)Hex(6)	O75503	NA	0.108488	NA
PASANISLYERHexNAc(5)Hex(6)Fuc(1)NeuAc(2)	O75151	0.297011	NA	NA
PASANISLYERHexNAc(8)Hex(5)	O75151	NA	2.80162	NA
PEAGTYSVNNGNDTCLLATMGLQLNITQDKHexNAc(9)Hex(6)Fuc(1)	P13473	0.331562	NA	1.44189
PENDSKHexNAc(2)Hex(5)	Q99523	1.99741	NA	NA
PGNLSRHexNAc(5)Hex(8)	Q9BU23	2.36653	NA	NA
PGNLSRPPPVVVPHQPRHexNAc(2)Hex(9)	Q9BU23	1.51705	NA	NA
PIHPSKAPNYPTEGNHRVEFNVNYTQDLDKHexNAc(2)Hex(9)	Q9GZT8	NA	NA	0.370903
PINHTVRHexNAc(2)Hex(10)	Q7L5Y6	0.872865	NA	NA
PINHTVRHexNAc(6)Hex(4)	Q7L5Y6	0.944545	NA	NA
PINLSHRHexNAc(2)Hex(10)	P41212	0.872865	NA	NA
PINLSHRHexNAc(2)Hex(9)	P41212	2.26725	NA	NA
PNITSSTPKHexNAc(2)Hex(7)	P51816	NA	1	NA
PNITSSTPKHexNAc(2)Hex(9)	P51816	NA	8.74641	NA
PNQTSKHexNAc(4)Hex(5)Fuc(1)NeuAc(1)	P15586	NA	0.625192	1.54552
PNQTSKHexNAc(6)Hex(4)	P15586	NA	0.189054	NA
PNQTSKHexNAc(7)Hex(4)	P15586	NA	4.499	NA
PNQTSKHexNAc(9)Hex(3)	P15586	NA	3.69729	4.0592
PPAPQENTTSEAGLPQGEARHexNAc(9)Hex(3)	Q9UKM9	NA	0.807153	NA
PQENISSRHexNAc(2)Hex(7)	Q9C0A6	8.97102	NA	NA
PQENISSRHexNAc(2)Hex(8)	Q9C0A6	7.4902	NA	NA
PQTNKHexNAc(2)Hex(4)Fuc(1)	Q14157	NA	1.43427	NA
PQTNKHexNAc(4)Hex(4)Fuc(1)NeuAc(1)	Q14157	NA	4.03702	NA
PQTNKHexNAc(4)Hex(4)NeuAc(1)	Q14157	NA	0.555914	NA
PQTNKHexNAc(5)Hex(4)NeuAc(2)	Q14157	0.813699	NA	NA
PSPSDPGSGTATMMNSSSRHexNAc(6)Hex(3)	Q5JRA6	NA	2.01435	NA
PSTANVTRHexNAc(2)Hex(6)	P0CW18	NA	1	NA
PTLNKHexNAc(2)Hex(7)	O43516	NA	1	NA
PTLNKHexNAc(5)Hex(6)NeuAc(2)	O43516	NA	1	NA
PTSPVSTDSNMSAAVMQKHexNAc(4)Hex(7)Fuc(1)	Q9Y6N7	NA	NA	2.44616
PTSPVSTDSNMSAAVMQKHexNAc(5)Hex(6)Fuc(1)	Q9Y6N7	NA	NA	0.999699
PTVTTVYANNGSVLQGSSVASVYDGKHexNAc(6)Hex(6)NeuAc(1)	Q15165	NA	NA	2.25989
PVPGYRGPVYNVTGEEVSFSFSTSSAPAVLLYVSSFVRHexNAc(6)Hex(3)	P78357	1.09578	NA	NA
PVQNGSQLFIKHexNAc(2)Hex(2)	O75151	NA	0.422154	NA
QADEDIQGTQNLLTSIESETAASEETLFNASQRHexNAc(2)Hex(8)	P07942	0.802415	NA	2.59345
QAFDQILQDRNHSSYLGYSVAAISTGESTHFVAGAPRHexNAc(2)Hex(8)	P17301	NA	0.632516	0.35103
QDNETGIYYETWNVKHexNAc(2)Hex(9)	O75503	1.2353	1.37951	NA
QEAANESNTRHexNAc(3)Hex(4)Fuc(1)	Q96MF4	7.4457	NA	NA
QEAANESNTRHexNAc(3)Hex(4)NeuAc(1)	Q96MF4	0.674392	NA	NA
QNLNVSLSDEMNEDFRHexNAc(5)Hex(9)Fuc(1)	Q8TEP8	NA	0.538644	NA
QNLNVSLSDEMNEDFRHexNAc(7)Hex(7)Fuc(1)NeuAc(2)	Q8TEP8	NA	0.102064	NA
QNLNVSLSDEMNEDFRSGSEAFDLIAQDEEEFNKHexNAc(6)Hex(3)	Q8TEP8	NA	1.2803	NA
QPNGSKHexNAc(2)	Q92545	NA	0.994857	NA
QPVSPVIHPPVSYNDTAPRHexNAc(2)Hex(10)	Q15904	NA	2.17388	NA
QPVSPVIHPPVSYNDTAPRHexNAc(2)Hex(8)	Q15904	1.08727	0.914643	1.01109
QPVSPVIHPPVSYNDTAPRHexNAc(2)Hex(9)	Q15904	1.64522	1.39744	1.48204
QPVSPVIHPPVSYNDTAPRHexNAc(4)Hex(3)	Q15904	NA	0.701139	NA
QPVSPVIHPPVSYNDTAPRHexNAc(5)Hex(6)Fuc(1)NeuAc(1)	Q15904	NA	0.721	NA
QQNQYQASYNQSFSSQPHQVEQTELQQEQLQTVVGTYHGSPDQSHQVTGNHQQPPQQNTGFPRHexNAc(3)Hex(4)	Q14444	NA	0.159041	0.119865
QRRSTNKHexNAc(2)Hex(10)	O94901	NA	0.62318	NA
QSNASSDVEVEEKHexNAc(6)Hex(9)Fuc(1)NeuAc(2)	O75475	NA	NA	1.67751
QSNASSDVEVEEKHexNAc(9)Hex(10)Fuc(1)NeuAc(4)	O75475	6.74203	8.25768	5.39689
QYNSTGDYRHexNAc(2)Hex(8)	O43657	1.33902	NA	NA
RAEDYGPVEVISHWHPNITINIVDDHTPWVKGSVPPPLDQYVKHexNAc(6)Hex(7)Fuc(1)NeuAc(1)	O96005	NA	0.381216	NA
RAEDYGPVEVISHWHPNITINIVDDHTPWVKHexNAc(2)Hex(8)	O96005	0.831912	1.26174	0.897351
RAEDYGPVEVISHWHPNITINIVDDHTPWVKHexNAc(2)Hex(9)	O96005	1.19412	0.638896	0.930711
RAEDYGPVEVISHWHPNITINIVDDHTPWVKHexNAc(6)Hex(4)	O96005	0.666761	NA	NA
RDPGAAVPGAANASAQQPRHexNAc(2)Hex(8)	P28300	0.185206	NA	0.548752
RDPGAAVPGAANASAQQPRHexNAc(2)Hex(9)	P28300	0.627466	0.862285	0.990041
RGDDLYTNVTISLVESLVGFEMDITHLDGHKHexNAc(2)Hex(10)	Q9UBS4	NA	NA	1.63381
RGDDLYTNVTISLVESLVGFEMDITHLDGHKHexNAc(2)Hex(9)	Q9UBS4	0.354756	1.49442	0.719957
RGDDLYTNVTISLVESLVGFEMDITHLDGHKHexNAc(6)Hex(5)	Q9UBS4	NA	NA	0.9837
RLAVNRHexNAc(2)Hex(8)	O15230	NA	6.54985	NA
RNWTITRHexNAc(2)Hex(10)	P19022	NA	1	1
RNWTITRHexNAc(2)Hex(4)Fuc(1)	P19022	NA	NA	0.189002
RNWTITRHexNAc(2)Hex(6)	P19022	1	NA	NA
RNWTITRHexNAc(2)Hex(7)	P19022	1.27941	1	1
RNWTITRHexNAc(2)Hex(8)	P19022	1	1.34949	1.44386
RNWTITRHexNAc(2)Hex(9)	P19022	1.5014	1	1.4969
RNWTITRHexNAc(9)Hex(6)	P19022	0.270681	NA	NA
RPNQSQPLPPSSLQRHexNAc(2)Hex(6)	Q92542	1.32598	2.07177	3.56581
RPNQSQPLPPSSLQRHexNAc(2)Hex(8)	Q92542	2.42315	1	2.10856
RPNQSQPLPPSSLQRHexNAc(2)Hex(9)	Q92542	NA	1.32726	1.48698
RPPLAELAALNLSGSRHexNAc(2)Hex(8)	Q13641	0.709414	0.979707	1.00638
RPSTANVTRHexNAc(2)Hex(10)	P0CW18	NA	1	2.2549
RPSTANVTRHexNAc(2)Hex(8)	P0CW18	NA	1.26654	NA
RPSTANVTRHexNAc(2)Hex(9)	P0CW18	NA	1.74165	1
RRDPGAAVPGAANASAQQPRHexNAc(2)Hex(8)	P28300	1.38343	0.925661	0.546035
RRDPGAAVPGAANASAQQPRHexNAc(2)Hex(9)	P28300	NA	1.04997	0.79742
RTPAKMCLNRHexNAc(4)Hex(5)Fuc(1)	Q13510	1	NA	NA
RTPAKMCLNRHexNAc(5)Hex(6)Fuc(1)	Q13510	1	NA	NA
RVNDNKHexNAc(2)Hex(6)	P11047	1.07965	NA	2.58125
RVNDNKHexNAc(2)Hex(7)	P11047	NA	0.666305	NA
RVNDNKHexNAc(2)Hex(8)	P11047	0.843615	0.606069	0.937697
RWNCSTVDNTSVFGRHexNAc(3)Hex(6)NeuAc(1)	P41221	NA	1.61977	NA
SAEFFNYTVRHexNAc(2)Hex(9)	O60568	1.0969	NA	NA
SAEGTFFINKHexNAc(2)Hex(8)	P06865	0.967555	0.935951	1.05276
SAEGTFFINKHexNAc(2)Hex(9)	P06865	NA	NA	1.14588
SANSTLAQALHWTRHexNAc(2)Hex(10)	Q9BU23	2.2699	NA	NA
SANSTLAQALHWTRHexNAc(2)Hex(7)	Q9BU23	1.98638	1.67035	NA
SANSTLAQALHWTRHexNAc(2)Hex(8)	Q9BU23	1.79844	1.73565	1.83214
SANSTLAQALHWTRHexNAc(2)Hex(9)	Q9BU23	2.40029	2.20645	1.79828
SANSTLAQALHWTRHexNAc(6)Hex(3)	Q9BU23	1.48384	NA	NA
SDSPSTSSIPPLNETVSAASLLTTTNQHSSSLGGLSHSEEIPNTTTTQHSSTLSTQQNTLSSSTSSGRHexNAc(1)	Q14157	0.62848	0.758886	0.660806
SDSPSTSSIPPLNETVSAASLLTTTNQHSSSLGGLSHSEEIPNTTTTQHSSTLSTQQNTLSSSTSSGRHexNAc(2)	Q14157	0.680253	0.786682	0.564358
SDSPSTSSIPPLNETVSAASLLTTTNQHSSSLGGLSHSEEIPNTTTTQHSSTLSTQQNTLSSSTSSGRHexNAc(8)Hex(9)	Q14157	NA	NA	0.286505
SEDIKNVSRHexNAc(2)Hex(8)	P78536	0.402923	0.362738	0.317838
SEDIKNVSRHexNAc(2)Hex(9)	P78536	0.191031	0.196667	0.177799
SELVNETRHexNAc(2)Hex(6)	Q9UGT4	0.63274	0.859699	0.715163
SELVNETRHexNAc(2)Hex(7)	Q9UGT4	0.760798	0.962752	0.651596
SELVNETRHexNAc(2)Hex(8)	Q9UGT4	0.562999	0.867957	NA
SELVNETRHexNAc(2)Hex(9)	Q9UGT4	NA	NA	0.6385
SELVNETRHexNAc(3)Hex(6)	Q9UGT4	1.2273	0.58522	0.57943
SENASLVLSSSNQKHexNAc(2)Hex(8)	P56199	1.14457	1.40914	1.54833
SENASLVLSSSNQKHexNAc(2)Hex(9)	P56199	1.13477	0.823085	1.56491
SINVTGQGFSLIQRHexNAc(2)Hex(9)	O15031	1.94293	NA	NA
SLDAYPILNQAQALENHTEVQFQKHexNAc(2)Hex(8)	P26006	0.991011	0.555599	1.13539
SLDAYPILNQAQALENHTEVQFQKHexNAc(2)Hex(9)	P26006	0.722241	1.50205	0.696314
SLSNSTARHexNAc(2)Hex(6)	P50454	1.19547	1	1.23043
SLSNSTARHexNAc(2)Hex(7)	P50454	1.26485	NA	1.5057
SLSNSTARHexNAc(2)Hex(8)	P50454	1	1	1
SLSNSTARHexNAc(2)Hex(9)	P50454	1.50429	1.28522	1.29356
SLVTQYLNATGNRHexNAc(1)Fuc(1)	P08195	0.967268	NA	NA
SLVTQYLNATGNRHexNAc(2)Hex(10)	P08195	2.04879	NA	2.37176
SNGSNALDMEKHexNAc(2)Hex(9)	Q8TEP8	NA	0.272886	NA
SNTSQLAFLLYNDQPPQPSKHexNAc(2)Hex(9)	O00115	NA	0.438644	1.209
SNVGKGNIDGNVSCSENLVANTARHexNAc(4)Hex(4)NeuAc(1)	Q92576	NA	NA	0.297461
SQNDKFNVSLTVKHexNAc(2)Hex(7)	P56199	0.435165	NA	NA
SQNDKFNVSLTVKHexNAc(2)Hex(8)	P56199	NA	0.449554	0.521743
SQNDTVTPDVWYTSKPKHexNAc(2)Hex(10)	Q9BTY2	NA	1.53584	0.893399
SQNRPQGQSTQPSNAAGTNTTSASTPRHexNAc(1)	Q9UHD9	1.39943	1.70172	1
SQNRPQGQSTQPSNAAGTNTTSASTPRHexNAc(2)	Q9UHD9	1.61841	1	1.71965
SQTFLEKHLNSSHPRHexNAc(2)Hex(4)	Q5JTV8	NA	NA	1.49016
SSCGKENTSDPSLVIAFGRHexNAc(4)Hex(5)Fuc(1)NeuAc(1)	P11279	0.180023	NA	NA
SSCGKENTSDPSLVIAFGRHexNAc(4)Hex(5)Fuc(1)NeuAc(2)	P11279	0.266127	NA	NA
SSCGKENTSDPSLVIAFGRHexNAc(5)Hex(6)Fuc(1)NeuAc(2)	P11279	0.710884	0.412496	1.36384
SSCGKENTSDPSLVIAFGRHexNAc(5)Hex(6)Fuc(1)NeuAc(3)	P11279	0.61718	0.41113	0.300959
SSCGKENTSDPSLVIAFGRHexNAc(6)Hex(7)Fuc(1)NeuAc(3)	P11279	0.109586	NA	NA
SSCGKENTSDPSLVIAFGRHexNAc(6)Hex(7)Fuc(1)NeuAc(4)	P11279	NA	0.100333	NA
SVHGGVPQNVSLWAHRHexNAc(2)Hex(10)	Q12891	NA	1.46352	NA
SVNLFGSGWNVSAMYSSSHPPAEHKHexNAc(2)Hex(8)	Q9Y487	1.31983	1.30875	NA
SVNLFGSGWNVSAMYSSSHPPAEHKHexNAc(2)Hex(9)	Q9Y487	3.81273	NA	NA
SYHNQTISFRHexNAc(2)Hex(8)	Q68CR1	1.50921	1.09373	0.825654
SYHNQTISFRHexNAc(2)Hex(9)	Q68CR1	NA	1.77035	1.6408
TAADTTGLQPILNQFTPANISRHexNAc(2)Hex(9)	P06756	0.975721	1.42142	NA
TALWVATDHNMDNTSTVLRHexNAc(2)Hex(8)	Q8NBJ5	0.814232	1.06625	1.38172
TALWVATDHNMDNTSTVLRHexNAc(2)Hex(9)	Q8NBJ5	1.06009	0.695849	0.895059
TANDTSTEAYNLLLRHexNAc(2)Hex(8)	P11047	0.774067	0.882329	NA
TANDTSTEAYNLLLRTLAGENQTAFEIEELNRHexNAc(6)Hex(7)Fuc(1)NeuAc(4)	P11047	NA	0.126832	NA
TDDEVVQREEEAIQLDGLNASQIRHexNAc(2)Hex(6)	P14625	1.23891	1.0626	NA
TDDEVVQREEEAIQLDGLNASQIRHexNAc(2)Hex(7)	P14625	0.867439	1.95563	0.768755
TDDEVVQREEEAIQLDGLNASQIRHexNAc(2)Hex(8)	P14625	0.349588	0.923203	0.909248
TDDEVVQREEEAIQLDGLNASQIRHexNAc(2)Hex(9)	P14625	0.428585	1.96443	0.352009
TENQTRHexNAc(4)Hex(5)Fuc(1)	P06756	NA	1.08743	1.33943
THNLTDLSPHLRHexNAc(2)Hex(10)	P32004	0.934128	1.78887	1.07179
THNLTDLSPHLRHexNAc(2)Hex(7)	P32004	0.979594	0.598719	0.623734
THNLTDLSPHLRHexNAc(2)Hex(8)	P32004	1.52732	1.05311	0.807581
THNLTDLSPHLRHexNAc(2)Hex(9)	P32004	1.09631	0.991738	0.84331
THNLTDLSPHLRHexNAc(3)Hex(6)NeuAc(1)	P32004	1.77345	1.26809	0.140591
THNLTDLSPHLRHexNAc(3)Hex(6)	P32004	NA	0.172687	NA
THNLTDLSPHLRHexNAc(4)Hex(5)Fuc(1)NeuAc(1)	P32004	0.614406	0.544477	0.631206
THNLTDLSPHLRHexNAc(4)Hex(5)Fuc(1)NeuAc(2)	P32004	5.04247	NA	NA
THNLTDLSPHLRHexNAc(4)Hex(5)Fuc(1)	P32004	2.44915	3.01116	0.745893
THNLTDLSPHLRHexNAc(4)Hex(5)NeuAc(1)	P32004	1.92585	0.114201	0.142325
THNLTDLSPHLRHexNAc(4)Hex(5)	P32004	NA	NA	0.763806
THNLTDLSPHLRHexNAc(4)Hex(6)Fuc(1)	P32004	NA	1.47765	NA
THNLTDLSPHLRHexNAc(5)Hex(6)Fuc(1)NeuAc(2)	P32004	0.597041	NA	0.506265
THNLTDLSPHLRHexNAc(5)Hex(6)Fuc(1)NeuAc(3)	P32004	0.201029	0.307431	0.18931
TILVDNNTWNNTHISRHexNAc(2)Hex(10)	P46977	0.603924	0.691776	0.731903
TILVDNNTWNNTHISRHexNAc(2)Hex(7)	P46977	0.782067	0.721121	0.927752
TILVDNNTWNNTHISRHexNAc(2)Hex(8)	P46977	1.00691	1.0509	1.03109
TILVDNNTWNNTHISRHexNAc(2)Hex(9)	P46977	0.135363	0.151569	0.402635
TILVDNNTWNNTHISRHexNAc(3)Hex(4)Fuc(1)NeuAc(1)	P46977	0.761216	NA	NA
TILVDNNTWNNTHISRHexNAc(5)Hex(3)Fuc(1)	P46977	NA	NA	5.74514
TILVDNNTWNNTHISRHexNAc(6)Hex(7)NeuAc(4)	P46977	NA	NA	7.27152
TLAGENQTAFEIEELNRHexNAc(2)Hex(8)	P11047	0.579571	0.837692	0.784965
TLSPTGNISSAPKHexNAc(2)Hex(8)	O94901	NA	NA	2.38118
TLSRPSETCNETTKHexNAc(2)Hex(8)	Q96AY3	0.587615	NA	0.955494
TLSRPSETCNETTKHexNAc(2)Hex(9)	Q96AY3	NA	1.2117	NA
TLTNQTEAELATPEGIYERPVDYLPERHexNAc(2)Hex(8)	O15460	NA	0.21187	NA
TMVFPVMYLNESVHIDKETASRHexNAc(2)Hex(10)	Q14108	0.686865	0.346433	0.46106
TMVFPVMYLNESVHIDKETASRHexNAc(2)Hex(9)	Q14108	0.702385	3.41717	NA
TNATKEKMDKHexNAc(2)Hex(9)	P07942	NA	NA	4.97824
TNSTFVQALVEHVKEECDRHexNAc(2)Hex(8)	P07602	NA	0.494044	0.55328
TNSTFVQALVEHVKEECDRHexNAc(4)Hex(5)Fuc(1)NeuAc(2)	P07602	0.198714	NA	NA
TPEFHPNKHexNAc(2)Hex(7)	Q96S16	1.22219	NA	0.895057
TPEFHPNKHexNAc(2)Hex(8)	Q96S16	0.670142	0.533205	0.320989
TPEFHPNKHexNAc(2)Hex(9)	Q96S16	NA	0.818779	0.772651
TRSANSTLAQALHWTRHexNAc(7)Hex(7)Fuc(1)NeuAc(3)	Q9BU23	2.63416	NA	NA
TSNSSQVSNEQDKIDAYKHexNAc(2)Hex(6)	Q5JRA6	0.685023	0.326886	0.400474
TSNSSQVSNEQDKIDAYKHexNAc(2)Hex(8)	Q5JRA6	0.662791	0.532715	0.703364
TTLVDNNTWNNSHIALVGKHexNAc(10)Hex(7)	Q8TCJ2	NA	NA	0.754323
TTLVDNNTWNNSHIALVGKHexNAc(2)Hex(10)	Q8TCJ2	1.07155	1.13969	1.37978
TTLVDNNTWNNSHIALVGKHexNAc(2)Hex(8)	Q8TCJ2	0.859308	0.928501	1.03764
TTLVDNNTWNNSHIALVGKHexNAc(2)Hex(9)	Q8TCJ2	1.16812	1.30113	1.09102
TTLVDNNTWNNSHIALVGKHexNAc(3)Hex(4)Fuc(1)NeuAc(1)	Q8TCJ2	NA	0.844678	NA
TTLVDNNTWNNSHIALVGKHexNAc(3)Hex(6)Fuc(1)NeuAc(1)	Q8TCJ2	NA	0.863881	NA
TVIRPFYLTNSSGVD	Q08380	0.577049	0.664628	NA
TVLENSTSYEEAKHexNAc(2)Hex(7)	Q13510	0.602234	0.361518	1.00153
TVLENSTSYEEAKHexNAc(2)Hex(8)	Q13510	1.23451	0.845261	1.48799
TVNSNCEINNRHexNAc(2)Hex(8)	Q15154	NA	NA	0.796591
TVNSNCEINNRHexNAc(2)Hex(9)	Q15154	NA	NA	1.18875
TVNVSVPKHexNAc(2)Hex(6)	Q96KA5	NA	1.12344	NA
TVNVSVPKHexNAc(2)Hex(7)	Q96KA5	NA	1.24296	1.53016
TVNVSVPKHexNAc(2)Hex(8)	Q96KA5	1	1	1.52401
TYNGTNPDAASRHexNAc(2)Hex(10)	O60637	1.34186	NA	NA
TYTYADTPDDFQLHNFSLPEEDTKHexNAc(2)Hex(9)	P04062	0.554805	0.683179	0.638216
TYTYADTPDDFQLHNFSLPEEDTKHexNAc(6)Hex(4)	P04062	0.773226	NA	NA
VASVININPNTTHSTGSCRHexNAc(2)Hex(9)	P13473	3.46927	NA	2.0419
VASVININPNTTHSTGSCRHexNAc(3)Hex(5)Fuc(1)	P13473	NA	1.07202	1.93147
VASVININPNTTHSTGSCRHexNAc(3)Hex(5)NeuAc(1)	P13473	0.941899	NA	NA
VASVININPNTTHSTGSCRHexNAc(3)Hex(6)	P13473	NA	1.68529	NA
VASVININPNTTHSTGSCRHexNAc(4)Hex(4)NeuAc(1)	P13473	4.41549	3.76092	4.19416
VASVININPNTTHSTGSCRHexNAc(4)Hex(5)Fuc(1)NeuAc(1)	P13473	1.89986	1.36937	NA
VASVININPNTTHSTGSCRHexNAc(4)Hex(5)Fuc(1)	P13473	1.81362	1.59763	1.61622
VASVININPNTTHSTGSCRHexNAc(5)Hex(5)NeuAc(2)	P13473	0.288104	NA	NA
VASVININPNTTHSTGSCRHexNAc(5)Hex(6)Fuc(1)NeuAc(1)	P13473	2.04625	2.13591	2.00225
VASVININPNTTHSTGSCRHexNAc(5)Hex(6)Fuc(1)NeuAc(2)	P13473	5.19899	0.493179	NA
VASVININPNTTHSTGSCRHexNAc(5)Hex(6)Fuc(1)	P13473	2.7108	2.73316	2.9091
VASVININPNTTHSTGSCRHexNAc(6)Hex(3)Fuc(1)NeuAc(2)	P13473	NA	NA	3.36982
VASVININPNTTHSTGSCRHexNAc(6)Hex(6)NeuAc(1)	P13473	NA	NA	5.06846
VASVININPNTTHSTGSCRHexNAc(8)Hex(5)	P13473	6.28209	NA	5.95324
VASVININPNTTHSTGSCRSHTALLRLNSSTIKHexNAc(2)Hex(9)	P13473	NA	1.38759	NA
VELNTSRHexNAc(2)Hex(9)	P78357	0.978599	0.861474	1.01791
VFHIHNESWVLLTPKHexNAc(2)Hex(9)	O75882	NA	NA	0.821725
VFKPPSSTEALNDSQEFPFPETPTKHexNAc(2)Hex(8)	Q4ZIN3	1.50203	NA	NA
VFKPPSSTEALNDSQEFPFPETPTKHexNAc(2)Hex(9)	Q4ZIN3	NA	0.663751	NA
VHNFSKHexNAc(2)Hex(11)	Q92545	NA	2.73049	NA
VHNRHexNAc(2)Hex(5)	Q9P2C4	1.09247	NA	NA
VIDGMTVVHSIELQATDGHDRPLTNCSIINSGKHexNAc(2)Hex(8)	P45877	0.550317	0.513143	NA
VIVTSKHNNDTQHIWESDSNEFSVIADPRHexNAc(3)Hex(6)Fuc(1)	P14625	3.08268	NA	1.55542
VIVTSKHNNDTQHIWESDSNEFSVIADPRHexNAc(5)Hex(7)Fuc(1)NeuAc(1)	P14625	0.385432	NA	NA
VIVTSKHNNDTQHIWESDSNEFSVIADPRHexNAc(7)Hex(8)Fuc(1)NeuAc(4)	P14625	NA	3.46044	NA
VIYNLTEKHexNAc(2)Hex(9)	Q969V3	NA	NA	0.945083
VKDLMVINRHexNAc(2)Hex(8)	Q96KA5	1.03769	0.921898	0.892279
VLGFKPKPPKNESLETYPVMKHexNAc(2)Hex(8)	P05026	NA	NA	1.81093
VNASTTEPNSTVEQSALMRHexNAc(2)Hex(8)	P07942	NA	NA	0.56476
VNCSYHRHexNAc(2)Hex(8)	Q8TDX9	NA	NA	5.45291
VNDNKHexNAc(2)Hex(8)	P11047	0.995355	NA	1.21928
VNLTFRTVYPDPRHexNAc(2)Hex(9)	Q96Q83	NA	0.226962	NA
VNNTAVIEKHexNAc(2)Hex(8)	Q9H330	0.455493	0.973123	NA
VNNTLSSQISRHexNAc(2)Hex(6)	P11047	0.510449	0.622163	NA
VNNTLSSQISRHexNAc(2)Hex(7)	P11047	1.04403	NA	NA
VNNTLSSQISRHexNAc(2)Hex(8)	P11047	1.5317	1.63047	1.52525
VNNTLSSQISRHexNAc(2)Hex(9)	P11047	NA	1.5109	1.7969
VNQSENSVPPPPPPPPPLPPPPPNPIRHexNAc(10)Hex(10)Fuc(1)	A0MZ66	NA	2.19986	NA
VNRTAAISGYSFKHexNAc(2)Hex(10)	P03951	3.07618	NA	NA
VNRTAAISGYSFKHexNAc(2)Hex(9)	P03951	NA	9.01661	NA
VNTLEEGKGGPRNDTEERHexNAc(2)Hex(8)	Q15818	0.687352	NA	NA
VPGNQTSTTLKHexNAc(2)Hex(8)	P32004	1.23184	1.31902	NA
VPGNQTSTTLKHexNAc(2)Hex(9)	P32004	NA	NA	1.73843
VPGNQTSTTLKHexNAc(4)Hex(5)Fuc(1)NeuAc(1)	P32004	NA	0.73529	0.819123
VPGNQTSTTLKHexNAc(4)Hex(5)Fuc(1)NeuAc(2)	P32004	1.07904	3.46252	9.59654
VPGNQTSTTLKHexNAc(4)Hex(6)NeuAc(1)	P32004	NA	1.6742	NA
VPLQSAHLYYNVTEKHexNAc(2)Hex(8)	Q32P28	0.79301	0.843172	0.776347
VPLQSAHLYYNVTEKHexNAc(2)Hex(9)	Q32P28	0.754227	0.923762	0.630954
VPLQSAHLYYNVTEKHexNAc(3)Hex(4)Fuc(1)NeuAc(1)	Q32P28	NA	3.874	NA
VPSENKDLYEYSWVQGPLHSNETDRHexNAc(2)Hex(8)	Q92542	NA	NA	0.819326
VPSENKDLYEYSWVQGPLHSNETDRLPRHexNAc(2)Hex(8)	Q92542	NA	0.85268	NA
VQNKHexNAc(2)Hex(8)	Q13620	NA	2.27729	NA
VQNKHexNAc(2)Hex(9)	Q13620	NA	1	NA
VQNKHexNAc(4)Hex(5)NeuAc(1)	Q13620	NA	1	NA
VQNKHexNAc(4)Hex(7)	Q13620	NA	2.40064	NA
VQPFNVTQGKHexNAc(2)Hex(10)	P13473	4.48728	NA	NA
VQPFNVTQGKHexNAc(2)Hex(6)	P13473	2.49806	NA	NA
VQPFNVTQGKHexNAc(2)Hex(7)	P13473	1.44698	1.42897	1.74456
VQPFNVTQGKHexNAc(2)Hex(8)	P13473	1.86178	1.13868	NA
VQPFNVTQGKHexNAc(2)Hex(9)	P13473	3.59568	2.93572	2.85392
VQPFNVTQGKHexNAc(3)Hex(6)NeuAc(1)	P13473	NA	NA	1.65423
VQPFNVTQGKHexNAc(3)Hex(6)	P13473	1.52821	1.84336	1.70057
VQRNITVRHexNAc(2)Hex(8)	P56199	NA	NA	1
VRIMGPNYTPGKHexNAc(2)Hex(10)	P13639	NA	NA	1
VRIMGPNYTPGKHexNAc(2)Hex(3)Fuc(1)	P13639	1	NA	1
VRIMGPNYTPGKHexNAc(2)Hex(8)	P13639	1	NA	1
VRIMGPNYTPGKHexNAc(2)Hex(9)	P13639	1	NA	1
VRIMGPNYTPGKHexNAc(3)Hex(4)Fuc(1)	P13639	1	NA	1
VRVNGWATLFLRTSIPTINMENKHexNAc(2)Hex(8)	P26006	NA	0.426557	NA
VTGLNCTTNHPINPKHexNAc(2)Hex(8)	P08648	NA	5.19876	NA
VTGLNCTTNHPINPKHexNAc(2)Hex(9)	P08648	NA	NA	1.19999
VTGLNCTTNHPINPKHexNAc(4)Hex(5)Fuc(1)NeuAc(1)	P08648	1.28954	1.30235	1.69806
VTGLNCTTNHPINPKHexNAc(4)Hex(5)Fuc(1)NeuAc(2)	P08648	1.8526	1.60905	1.64708
VTNSNANAASPLIVAGYNVSGSVRHexNAc(2)Hex(8)	P69849	3.75279	NA	NA
VTNSNANAASPLIVAGYNVSGSVRHexNAc(2)Hex(9)	Q15155	NA	3.17329	NA
VTNSNANAASPLIVAGYNVSGSVRHexNAc(3)Hex(5)NeuAc(1)	Q15155	NA	NA	0.349393
VTNSNANAASPLIVAGYNVSGSVRHexNAc(6)Hex(3)	P69849	1.56397	NA	NA
VTNSNANAASPLIVAGYNVSGSVRHexNAc(6)Hex(4)	P69849	1.24586	NA	NA
VTNSNANAASPLIVAGYNVSGSVRHexNAc(7)Hex(7)Fuc(1)NeuAc(2)	P69849	NA	1	NA
VTYQNHNKHexNAc(2)Hex(7)	P32004	NA	NA	1.53799
VTYQNHNKHexNAc(2)Hex(8)	P32004	1.44671	1.38662	1.49604
VTYQNHNKHexNAc(2)Hex(9)	P32004	1.53741	1.38878	1.41606
VTYQNHNKHexNAc(4)Hex(5)NeuAc(1)	P32004	NA	0.667584	0.66921
VTYQNHNKHexNAc(4)Hex(5)NeuAc(2)	P32004	5.38962	0.844051	0.856865
VTYQNHNKHexNAc(4)Hex(5)	P32004	NA	NA	1.10713
VTYQNHNKHexNAc(5)Hex(6)NeuAc(3)	P32004	NA	NA	1.45933
VTYQNHNKHexNAc(7)Hex(4)Fuc(1)	P32004	0.294583	NA	NA
VVANGTGTQGQLKHexNAc(2)Hex(10)	P08236	2.11857	NA	NA
VVANGTGTQGQLKHexNAc(2)Hex(6)	P08236	1.00516	1.31649	1.46334
VVANGTGTQGQLKHexNAc(2)Hex(7)	P08236	NA	NA	0.966518
VVANGTGTQGQLKHexNAc(2)Hex(8)	P08236	1.58433	1.48129	2.22734
VVANGTGTQGQLKHexNAc(2)Hex(9)	P08236	1.8549	NA	1.68587
VVNSTTGPGEHLRHexNAc(2)Hex(8)	P07996	0.856935	0.683883	0.375719
VVNSTTGPGEHLRHexNAc(2)Hex(9)	P07996	1.38417	1.39793	NA
VVNSTTGPGEHLRHexNAc(4)Hex(7)	P07996	0.805113	0.857203	NA
VVVVDGKNESEYTVKHexNAc(2)Hex(8)	P78536	NA	1.02578	NA
VWNSTFIEDYRDFDRHexNAc(2)Hex(8)	P26006	NA	NA	1.24916
VWNSTFIEDYRDFDRHexNAc(2)Hex(9)	P26006	0.767261	0.799145	0.877535
VWQGHANASFCPHGYGCRHexNAc(2)Hex(9)	O15230	NA	1.97187	NA
VWQGHANASFCPHGYGCRHexNAc(6)Hex(4)	O15230	1.07913	NA	NA
VYWNRHexNAc(2)Hex(10)	Q7Z388	1.65774	NA	1.5964
VYWNRHexNAc(2)Hex(8)	Q7Z388	2.03772	NA	1.50195
VYWNRHexNAc(2)Hex(9)	Q7Z388	1.6206	NA	1.46149
VYWNRHexNAc(4)Hex(5)NeuAc(1)	Q7Z388	0.855217	NA	0.986213
VYWNRHexNAc(4)Hex(5)NeuAc(2)	Q7Z388	7.70312	NA	0.878626
VYWNRHexNAc(5)Hex(6)NeuAc(2)	Q7Z388	NA	NA	0.868644
WDFLQFAEAWTPNDSSEELRHexNAc(2)Hex(8)	Q5FWF4	NA	NA	0.650163
WDFLQFAEAWTPNDSSEELRHexNAc(6)Hex(3)	Q5FWF4	NA	NA	3.95992
WDRIAPASNVSHTVVLRPLKAGYFNFTSATITYLAQEDGPVVIGSTSAPGQGGILAQRHexNAc(6)Hex(11)Fuc(1)	P43308	NA	1.02093	NA
WGHNITEFQQRHexNAc(2)Hex(7)	Q96HE7	0.606603	NA	1.45175
WGHNITEFQQRHexNAc(2)Hex(8)	Q96HE7	1.12783	1.04546	0.64303
WGHNITEFQQRHexNAc(2)Hex(9)	Q96HE7	0.940447	1.07977	1.08713
WGHNITEFQQRHexNAc(6)Hex(6)Fuc(1)NeuAc(1)	Q96HE7	8.57684	NA	NA
WNCSTVDNTSVFGRHexNAc(2)Hex(9)	P41221	NA	1.86602	0.963312
WQMNFTVRYETTNKHexNAc(2)Hex(8)	P13473	NA	9.52312	NA
WQYYGTANTSGNLSLTWHVKHexNAc(6)Hex(7)Fuc(1)NeuAc(4)	Q9UGT4	NA	2.16542	NA
YEQAKNISQDLEKHexNAc(7)Hex(6)Fuc(1)NeuAc(4)	P11047	NA	1.92243	NA
YEQLQNETRHexNAc(2)Hex(6)	P11117	0.991879	1.01662	0.826011
YEQLQNETRHexNAc(2)Hex(7)	P11117	0.553444	0.583163	1.01644
YEQLQNETRHexNAc(2)Hex(8)	P11117	0.997846	0.997926	0.958296
YEQLQNETRHexNAc(2)Hex(9)	P11117	1.0436	0.823449	0.811942
YETTNKHexNAc(2)Hex(8)	P13473	1.23673	0.439854	NA
YETTNKHexNAc(2)Hex(9)	P13473	1.001	NA	NA
YETTNKHexNAc(6)Hex(3)Fuc(1)NeuAc(2)	P13473	NA	NA	0.316049
YFNYTVKHexNAc(2)Hex(8)	O00469	0.566317	NA	1.30368
YFNYTVKHexNAc(2)Hex(9)	O00469	NA	1.21721	1.89358
YFYLQAVNSEGQNLTRHexNAc(2)Hex(9)	Q7Z4H8	0.936067	NA	NA
YHGFLNTSYHRHexNAc(2)Hex(8)	P11117	NA	NA	1.37474
YHGFLNTSYHRHexNAc(2)Hex(9)	P11117	NA	NA	1.3986
YHGFLNTSYHRHexNAc(5)Hex(6)Fuc(1)NeuAc(1)	P11117	NA	2.50405	NA
YHGFLNTSYHRHexNAc(5)Hex(6)Fuc(1)NeuAc(2)	P11117	NA	NA	2.11703
YHINKHexNAc(4)Hex(5)Fuc(1)NeuAc(1)	Q9Y6N7	0.915821	NA	0.650312
YHINKHexNAc(4)Hex(5)Fuc(1)NeuAc(2)	Q9Y6N7	NA	NA	0.660202
YHINKHexNAc(4)Hex(5)Fuc(1)	Q9Y6N7	NA	NA	1.34995
YHINKHexNAc(4)Hex(5)NeuAc(1)	Q9Y6N7	1.993	NA	1.38271
YHINKHexNAc(4)Hex(5)	Q9Y6N7	NA	NA	1.14723
YHINKHexNAc(5)Hex(6)Fuc(1)NeuAc(1)	Q9Y6N7	NA	NA	0.402918
YHINKHexNAc(5)Hex(6)NeuAc(1)	Q9Y6N7	NA	NA	0.516358
YHINKHexNAc(7)Hex(4)	Q9Y6N7	5.92602	NA	9.33751
YHQPGHEAVTSAVDQLQQEFHCCGSNNSQDWRHexNAc(4)Hex(5)NeuAc(1)	P48509	0.868428	NA	NA
YHQPGHEAVTSAVDQLQQEFHCCGSNNSQDWRHexNAc(5)Hex(4)Fuc(1)	P48509	0.122375	NA	NA
YHSQTYGNGSKHexNAc(2)Hex(9)	Q13438	1.97474	NA	NA
YHTESLQNMSKHexNAc(2)Hex(9)	O94992	5.76685	NA	NA
YHVLHINTTKHexNAc(2)Hex(10)	Q7LGA3	NA	1.07139	NA
YHVLHINTTKHexNAc(3)Hex(5)NeuAc(1)	Q7LGA3	2.64441	0.779206	0.501575
YHVLHINTTKHexNAc(3)Hex(6)Fuc(1)NeuAc(1)	Q7LGA3	NA	0.69976	NA
YHVLHINTTKHexNAc(3)Hex(6)Fuc(1)	Q7LGA3	6.64046	NA	NA
YHVLHINTTKHexNAc(3)Hex(6)NeuAc(1)	Q7LGA3	0.763248	1	0.692296
YHVLHINTTKHexNAc(6)Hex(5)	Q7LGA3	NA	6.42331	NA
YHYNASLLDGTLLDSTWNLGKHexNAc(2)Hex(8)	O95302	0.775266	1.12333	1.2948
YHYNASLLDGTLLDSTWNLGKHexNAc(2)Hex(9)	O95302	0.471537	NA	NA
YHYNCSLLDGTQLFTSHDYGAPQEATLGANKHexNAc(2)Hex(6)	Q96AY3	0.607516	NA	0.798843
YHYNCSLLDGTQLFTSHDYGAPQEATLGANKHexNAc(2)Hex(7)	Q96AY3	0.761271	0.666071	0.59
YHYNCSLLDGTQLFTSHDYGAPQEATLGANKHexNAc(2)Hex(8)	Q96AY3	0.815725	0.992055	NA
YHYNCSLLDGTQLFTSHDYGAPQEATLGANKHexNAc(2)Hex(9)	Q96AY3	0.83938	0.518637	1.04621
YHYNGSLMDGTLFDSSYSRHexNAc(2)Hex(8)	Q96AY3	0.805176	0.645384	1.00228
YHYNGSLMDGTLFDSSYSRHexNAc(2)Hex(9)	Q96AY3	0.66167	0.576205	0.659966
YHYNGTFEDGKHexNAc(2)Hex(5)Fuc(1)	Q96AY3	NA	NA	1.09357
YHYNGTFEDGKHexNAc(2)Hex(6)	Q96AY3	1.01264	0.821364	0.984812
YHYNGTFEDGKHexNAc(2)Hex(7)	Q96AY3	0.920839	0.829962	1.05689
YHYNGTFEDGKHexNAc(2)Hex(8)	Q96AY3	0.978816	0.861786	0.891364
YHYNGTFEDGKHexNAc(2)Hex(9)	Q96AY3	1.04137	0.854827	0.919081
YHYNGTFEDGKKHexNAc(2)Hex(3)Fuc(1)	Q96AY3	NA	0.261213	NA
YHYNGTFEDGKKHexNAc(2)Hex(6)	Q96AY3	0.780394	0.76179	0.937194
YHYNGTFEDGKKHexNAc(2)Hex(7)	Q96AY3	0.927574	0.965272	0.831525
YHYNGTFEDGKKHexNAc(2)Hex(8)	Q96AY3	0.828898	0.94085	0.751913
YHYNGTFEDGKKHexNAc(2)Hex(9)	Q96AY3	0.534408	0.799947	0.779876
YHYNGTFEDGKKHexNAc(5)Hex(5)Fuc(1)NeuAc(2)	Q96AY3	0.753435	NA	NA
YHYNGTFLDGTLFDSSHNRHexNAc(2)Hex(7)	O95302	0.692435	0.816978	0.624735
YHYNGTFLDGTLFDSSHNRHexNAc(2)Hex(8)	O95302	0.789558	0.784027	0.863997
YHYNGTFLDGTLFDSSHNRHexNAc(2)Hex(9)	O95302	0.592762	1.50352	NA
YHYNGTLLDGTLFDSSYSRHexNAc(2)Hex(8)	O95302	1.06922	0.878293	0.870759
YHYNGTLLDGTLFDSSYSRHexNAc(2)Hex(9)	O95302	1.25704	1.00562	1.14356
YHYNGTLLDGTSFDTSYSKHexNAc(2)Hex(7)	Q96AY3	NA	NA	0.877325
YHYNGTLLDGTSFDTSYSKHexNAc(2)Hex(8)	Q96AY3	0.606542	0.621048	0.647911
YHYNGTLLDGTSFDTSYSKHexNAc(2)Hex(9)	Q96AY3	0.700231	0.648235	0.674622
YHYNGTLLDGTSFDTSYSKHexNAc(3)Hex(5)NeuAc(1)	Q96AY3	NA	8.9596	NA
YHYNGTLLDGTSFDTSYSKHexNAc(4)Hex(6)	Q96AY3	NA	4.44935	NA
YIHQNYTKALAGKHexNAc(2)Hex(8)	Q02809	NA	NA	1
YIHQNYTKALAGKHexNAc(2)Hex(9)	Q02809	NA	1	NA
YIHQNYTKHexNAc(2)Hex(6)	Q02809	1.1194	1.1799	1.5241
YIHQNYTKHexNAc(2)Hex(7)	Q02809	1.41743	1.40881	1.10741
YIHQNYTKHexNAc(2)Hex(8)	Q02809	1.45947	1	1.37384
YIHQNYTKHexNAc(2)Hex(9)	Q02809	1	1.38195	1.63564
YIHQNYTKHexNAc(5)Hex(5)Fuc(1)	Q02809	NA	NA	1
YIHQNYTKHexNAc(6)Hex(3)Fuc(1)	Q02809	NA	1	NA
YIHQNYTKHexNAc(9)Hex(10)Fuc(1)NeuAc(4)	Q02809	1	NA	NA
YIPPNESNLTQLYMHLTNYSVNKHexNAc(2)Hex(7)	Q6ZT98	NA	1.07376	NA
YKGLNLTEDTYKPRHexNAc(5)Hex(8)Fuc(1)	Q08380	NA	0.24057	NA
YNCSIESPRHexNAc(2)Hex(10)	O00469	0.914873	0.941117	1.31144
YNCSIESPRHexNAc(2)Hex(6)	O00469	0.871246	0.813878	0.858258
YNCSIESPRHexNAc(2)Hex(7)	O00469	1.21004	0.853288	1.04441
YNCSIESPRHexNAc(2)Hex(8)	O00469	0.827681	0.942129	0.963675
YNCSIESPRHexNAc(2)Hex(9)	O00469	0.953543	0.798452	0.941388
YNCSIESPRHexNAc(3)Hex(4)Fuc(1)NeuAc(1)	O00469	0.741068	0.856926	NA
YNCSIESPRHexNAc(6)Hex(6)Fuc(1)NeuAc(1)	O00469	5.57203	NA	NA
YNCSIRHexNAc(2)Hex(7)	Q02809	NA	5.43992	3.58981
YNCSIRHexNAc(2)Hex(8)	Q02809	1.28669	1	1.24447
YNCSIRHexNAc(2)Hex(9)	Q02809	1.09552	1.16444	1.213
YNCSIRHexNAc(6)Hex(4)	Q02809	0.528713	0.522082	NA
YNCSIRHexNAc(6)Hex(5)	Q02809	0.63083	NA	0.649573
YNHTGQVIIYRHexNAc(2)Hex(8)	P56199	1.58732	2.76075	1.65491
YNHTGQVIIYRHexNAc(2)Hex(9)	P56199	1.69457	1.53455	1.64103
YNHTGQVIIYRHexNAc(6)Hex(4)	P56199	NA	NA	1.10462
YPANCTVRHexNAc(2)Hex(8)	Q9BRN9	NA	1.05464	0.994198
YPANCTVRHexNAc(5)Hex(6)Fuc(1)NeuAc(3)	Q9BRN9	NA	NA	0.827358
YPQDYQFYIQNFTALPLNTVVPPQRHexNAc(2)Hex(8)	P43307	1.7826	0.734806	1.60379
YPQDYQFYIQNFTALPLNTVVPPQRHexNAc(2)Hex(9)	P43307	1.70863	1.60049	1.43211
YPQDYQFYIQNFTALPLNTVVPPQRHexNAc(6)Hex(3)	P43307	NA	NA	0.821097
YQLGTSPYVYQLTTRPVTDGQPHSINITRHexNAc(2)Hex(9)	P78357	1.48375	1.87934	2.39682
YSLNVTYNYPVHYFDGRHexNAc(2)Hex(10)	Q9NV96	1.16514	0.882103	0.877602
YSLNVTYNYPVHYFDGRHexNAc(2)Hex(9)	Q9NV96	NA	1.11168	NA
YVWNRHexNAc(2)Hex(10)	P10696	1.3718	NA	1.5964
YVWNRHexNAc(2)Hex(8)	P10696	NA	NA	1.67457
YVWNRHexNAc(4)Hex(5)NeuAc(1)	P10696	NA	1.10113	0.986213
YVWNRHexNAc(4)Hex(5)NeuAc(2)	P05187	NA	0.749461	NA
YVWNRHexNAc(5)Hex(6)NeuAc(1)	P05187	NA	0.632669	NA
YVWNRHexNAc(5)Hex(6)NeuAc(2)	P10696	NA	NA	0.868644
YYNYTLSINGKHexNAc(2)Hex(6)	P15586	NA	1	NA
FNQCNTTRHexNAc(1)Fuc(1)	P10696	NA	1.51901	1.58269
FNQCNTTRHexNAc(2)Hex(10)	P10696	NA	NA	1.86642
FNQCNTTRHexNAc(2)Hex(8)	P10696	1.41738	NA	1.47318
FNQCNTTRHexNAc(2)Hex(9)	P09923	1.59108	NA	NA
FNQCNTTRHexNAc(2)Hex(9)	P10696	NA	NA	1.35201
FNQCNTTRHexNAc(4)Hex(5)Fuc(1)NeuAc(1)	P09923	1	NA	NA
FNQCNTTRHexNAc(4)Hex(5)Fuc(1)NeuAc(1)	P10696	NA	NA	0.815586
FNQCNTTRHexNAc(4)Hex(5)Fuc(1)NeuAc(2)	P09923	3.85816	NA	NA
FNQCNTTRHexNAc(4)Hex(5)Fuc(1)NeuAc(2)	P10696	NA	NA	1.02005
LENITTGTYTIHAQKHexNAc(2)Hex(7)	Q15155	NA	0.403358	0.429695
LENITTGTYTIHAQKHexNAc(2)Hex(9)	Q15155	NA	NA	0.908226
NYTADYDKHexNAc(2)Hex(7)	O94905	NA	0.958367	NA
NYTADYDKHexNAc(2)Hex(8)	O94905	NA	0.87161	NA
VTNSNANAASPLIVAGYNVSGSVRHexNAc(2)Hex(8)	Q15155	NA	2.77272	2.47968
VTNSNANAASPLIVAGYNVSGSVRHexNAc(6)Hex(3)	Q15155	NA	1.37463	1.56373
VTNSNANAASPLIVAGYNVSGSVRHexNAc(6)Hex(4)	Q15155	NA	1.47343	1.61252
YVWNRHexNAc(4)Hex(5)NeuAc(2)	P10696	0.752944	NA	0.878472

## Sheet: TableS5
Table S5 The quantified intact N-glycopeptides and glycoproteins in huh7 cells
glycopeptide	protein	after infection			before infection
		L1	L2	L3	H1	H2	H3
EEEENLTRK-HexNAc(5)Hex(7)	P56277	NA	NA	3.11328e+06	NA	NA	2.93646e+06
NLTLR-HexNAc(6)Hex(7)NeuAc(4)	P05362	5.1975e+06	NA	NA	1.91087e+08	NA	NA
HLQLLLPHATDIYSRSANLLKESPWNGSVGEK-HexNAc(2)Hex(5)	Q15751	NA	NA	3.20195e+07	NA	NA	1.25638e+06
EENK-HexNAc(5)Hex(5)Fuc(1)	Q5SSJ5	NA	2.79782e+06	4.29004e+06	NA	8.01674e+06	2.8386e+06
LNSSTIK-HexNAc(6)Hex(8)Fuc(1)NeuAc(1)	P13473	3.92426e+07	1.14639e+07	NA	1.23331e+07	1.35207e+08	NA
VQPFNVTQGK-HexNAc(2)Hex(9)	P13473	NA	8.58054e+06	5.13335e+06	NA	2.43305e+07	7.70291e+06
PLMRRDQMEGSPNSSESFEHIAR-HexNAc(2)Hex(7)	Q9Y520	NA	NA	2.98553e+07	NA	NA	3.59534e+06
WKGCIHDNR-HexNAc(2)Hex(7)	Q8WXD9	NA	NA	6.57947e+06	NA	NA	8.32371e+06
NR-HexNAc(4)Hex(7)NeuAc(1)	Q4KMQ2	NA	5.29132e+06	NA	NA	1.73837e+07	NA
DLGPTLANSTHHNVR-HexNAc(5)Hex(6)Fuc(1)NeuAc(2)	P04062	9.28689e+06	1.00728e+07	NA	1.96776e+06	5.81143e+06	NA
EEEPVFTRQDSNR-HexNAc(5)Hex(6)NeuAc(2)	Q9Y520	NA	NA	5.80852e+06	NA	NA	9.82651e+06
FNSTQIAAMAPEHEEPR-HexNAc(6)Hex(11)Fuc(1)	Q4G148	NA	1.63025e+07	NA	NA	3.38398e+06	NA
EQEAAMEIQEPAANK-HexNAc(4)Hex(5)	Q92576	NA	23185672	NA	NA	2523887	NA
NNHTASILDR-HexNAc(2)Hex(8)	P08962	4.68105e+07	5.4037e+07	2.70062e+07	2.73733e+07	3.15184e+07	1.56083e+07
EFANFTFPR-HexNAc(2)Hex(9)	Q96L92	1.75859e+07	NA	NA	6.15911e+06	NA	NA
EQEAAMEIQEPAANK-HexNAc(2)Hex(9)	Q92576	NA	4.1148e+06	NA	NA	1.52771e+06	NA
VVNSTTGPGEHLR-HexNAc(2)Hex(9)	P07996	1.91667e+07	1.91099e+07	1.10981e+07	1.09728e+07	1.01357e+07	8.82131e+06
GDPSVISVNGTDFTFR-HexNAc(2)Hex(9)	Q9UHN6	8.79505e+06	1.25497e+07	NA	3.85615e+06	8.71906e+06	NA
DQPGHPVNR-HexNAc(2)Hex(7)	Q16880	6.70857e+06	NA	NA	1.41975e+06	NA	NA
MMNDSCQNLPK-HexNAc(2)Hex(6)	Q8IYT4	NA	221019	104820	NA	2.82387e+07	1.17973e+07
FTPVHNR-HexNAc(2)Hex(9)	Q92545	NA	5.98969e+07	NA	NA	7.10269e+07	NA
EGGPLLYEGISLTMNSKLLNGSQRVVMDGVISDHECQELQR-HexNAc(3)Hex(4)	Q32P28	NA	1.24304e+07	NA	NA	1.59166e+07	NA
KDNTTVTR-HexNAc(2)Hex(8)	P11279	NA	NA	2.25091e+06	NA	NA	2.01287e+06
EDPSPENR-HexNAc(6)Hex(7)Fuc(1)NeuAc(3)	Q01826	NA	8.64945e+06	NA	NA	1.17341e+06	NA
NNSNNFDLNR-HexNAc(6)Hex(4)Fuc(1)	O75976	NA	3.40356e+06	NA	NA	1.55511e+07	NA
ENQNHSYSLK-HexNAc(2)Hex(3)	P06756	NA	5.96311e+06	NA	NA	5.62446e+06	NA
LIDNNKTEK-HexNAc(5)Hex(9)Fuc(1)	P07602	NA	244992	NA	NA	444611	NA
KNQENISSVK-HexNAc(2)Hex(8)	O76041	2.76831e+07	NA	NA	1.68538e+07	NA	NA
TCHESYNR-HexNAc(4)Hex(5)NeuAc(2)	P33908	NA	1.53379e+07	NA	NA	5.43353e+06	NA
SFSCSATLEVAGQLIHKNQTR-HexNAc(4)Hex(5)Fuc(1)NeuAc(2)	P05362	NA	2.22601e+07	NA	NA	8.60559e+06	NA
ANTTQPGIVEGGQVLK-HexNAc(4)Hex(5)Fuc(1)NeuAc(2)	P06756	2.75842e+07	5972607	2.06155e+07	7.64894e+06	559476	2.62503e+06
TILVDNNTWNNTHISR-HexNAc(2)Hex(1)	P46977	NA	6.79184e+07	4.44886e+07	NA	4.04602e+07	2.04127e+07
NK-HexNAc(6)Hex(7)Fuc(1)NeuAc(4)	Q4KMQ2	NA	NA	3.23443e+06	NA	NA	3.72045e+06
GNLSIHMQSDK-HexNAc(2)Hex(9)	Q86UP3	NA	3.82344e+06	NA	NA	3.44443e+07	NA
NNATVHEQVGGPSLTSDLQAQSK-HexNAc(2)Hex(6)	P04004	1.89508e+07	1.67398e+07	10219289	12761080	5.69811e+06	4.45694e+06
ERVNASR-HexNAc(3)Hex(4)Fuc(1)NeuAc(1)	Q15166	6.22147e+07	NA	NA	1.80503e+06	NA	NA
NVTVK-HexNAc(5)Hex(4)Fuc(1)	O75976	NA	7.96875e+07	NA	NA	7.96875e+07	NA
ENK-HexNAc(5)Hex(8)Fuc(1)	A0MZ66	NA	NA	7.60401e+06	NA	NA	602954
RDPGAAVPGAANASAQQPR-HexNAc(2)Hex(6)	P28300	NA	17953227	NA	NA	69172147	NA
LLNINPNK-HexNAc(6)Hex(8)NeuAc(1)	P11279	NA	NA	9.39865e+07	NA	NA	1.12799e+07
INTTADEKDPTNPFR-HexNAc(2)Hex(9)	O14672	4.28664e+08	5.38231e+08	2.66037e+08	2.75263e+08	2.80804e+08	1.56799e+08
KLNYTLSQGHR-HexNAc(5)Hex(6)NeuAc(2)	P15144	4.10535e+07	4.15955e+07	2.50136e+07	5.90753e+07	6.65632e+07	3.67186e+07
EENK-HexNAc(6)Hex(6)NeuAc(1)	Q5SSJ5	NA	NA	644145	NA	NA	2.41716e+06
VQPFNVTQGK-HexNAc(5)Hex(6)Fuc(1)NeuAc(2)	P13473	3.0917e+06	3.54256e+06	7.71545e+07	3.27375e+07	4.56555e+07	9.79414e+07
TTLVDNNTWNNSHIALVGK-HexNAc(2)Hex(10)	Q8TCJ2	6.311e+07	NA	NA	59077991	NA	NA
SNVGKGNIDGNVSCSENLVANTAR-HexNAc(4)Hex(4)NeuAc(1)	Q92576	NA	3.49973e+07	NA	NA	1.12948e+07	NA
KNASNMEYR-HexNAc(2)Hex(9)	Q9Y639	1.42157e+07	1.82996e+07	NA	8.82385e+06	1.07509e+07	NA
NK-HexNAc(6)Hex(3)Fuc(1)NeuAc(2)	Q4KMQ2	NA	NA	2.84416e+06	NA	NA	1.57475e+07
IQDHFNSSIK-HexNAc(2)Hex(8)	Q9UHL0	7.74227e+08	NA	NA	6.50874e+07	NA	NA
ENVGIYNLSK-HexNAc(1)Fuc(1)	P69849	NA	NA	178094	NA	NA	6.59145e+06
DNDSLAAR-HexNAc(4)Hex(5)Fuc(1)NeuAc(1)	P54886	NA	3.06835e+07	NA	NA	8.74038e+06	NA
GNLSIHMQSDK-HexNAc(6)Hex(3)	Q86UP3	NA	5.913e+06	NA	NA	7.81589e+07	NA
NK-HexNAc(5)Hex(6)Fuc(1)	Q4KMQ2	NA	NA	1.00607e+06	NA	NA	9.94432e+06
HTNMNLTQLK-HexNAc(3)Hex(4)Fuc(1)NeuAc(1)	Q15165	NA	NA	1.57348e+08	NA	NA	1.6131e+07
ENK-HexNAc(6)Hex(6)NeuAc(1)0	A0MZ66	3.7586e+06	NA	NA	1.66893e+07	NA	NA
GTNFTHLVADR-HexNAc(2)Hex(1)	Q9C0C4	NA	3746043	NA	NA	3.41172e+06	NA
PNLSYIIGK-HexNAc(2)Hex(10)	P01024	2.40314e+06	NA	NA	2.40314e+06	NA	NA
NISQDLEK-HexNAc(8)Hex(9)Fuc(1)NeuAc(4)	P11047	9.87485e+06	NA	NA	5113630	NA	NA
EEEPVFTRQDSNRSEK-HexNAc(7)Hex(8)Fuc(1)	Q9Y520	NA	8147850	NA	NA	1.28714e+07	NA
RAQAVETNK-HexNAc(2)Hex(1)	P11150	NA	1.49948e+07	NA	NA	6.51503e+06	NA
MNK-HexNAc(2)Hex(4)	P01024	29641927	NA	NA	2.0183e+07	NA	NA
LNPTVTYGNDSFSAK-HexNAc(6)Hex(8)NeuAc(1)	P05362	249088	NA	NA	12291999	NA	NA
HNSTGCLR-HexNAc(2)Hex(10)	P10909	1.72674e+06	NA	NA	1.72674e+06	NA	NA
KRPRWTPDDYINMTSDCSSFIK-HexNAc(2)Hex(7)	Q02742	NA	NA	5.07518e+06	NA	NA	6.02039e+06
NHSIFLADINQER-HexNAc(2)Hex(1)	P50897	NA	2.34824e+07	1.68239e+07	NA	6.26481e+06	5.612e+06
HGFDVCAKLAWEGNETVTTR-HexNAc(2)Hex(9)	Q9H2X9	3.40057e+06	NA	NA	7258919	NA	NA
ENK-HexNAc(7)Hex(3)	A0MZ66	NA	NA	2.20284e+06	NA	NA	2.46779e+06
LISNCSK-HexNAc(2)Hex(10)	P05156	1.25939e+07	NA	NA	1.13012e+07	NA	NA
EEEELAYDWSDNNSNISAKR-HexNAc(7)Hex(4),HexNAc(3)Hex(4)	Q9UPN3	NA	2.82315e+06	NA	NA	2.03428e+06	NA
KNSTTNYR-HexNAc(2)Hex(6)	A0JNW5	583119	290642	NA	3.56726e+06	5.24271e+06	NA
HNNDTQHIWESDSNEFSVIADPR-HexNAc(4)Hex(3)Fuc(1)	P14625	2.67417e+07	3.03786e+07	1.53593e+07	1.62319e+07	1.14722e+07	9.20467e+06
KDFLARNMTK-HexNAc(2)Hex(9)	Q6ZT98	1.78094e+06	NA	NA	3.86392e+07	NA	NA
NWSLPNR-HexNAc(2)Hex(9)	P55058	1.16517e+07	2.03353e+07	NA	1.06524e+07	2.44038e+07	NA
AASMNHTK-HexNAc(2)Hex(9)	Q9UBV2	3.63318e+07	NA	NA	4.38825e+07	NA	NA
NHSSYLGYSVAAISTGESTHFVAGAPR-HexNAc(2)Hex(8)	P17301	7722303	NA	NA	5.98732e+06	NA	NA
KEENFSSPK-HexNAc(2)Hex(9)	Q96SB8	4.6023e+06	NA	NA	2.4991e+07	NA	NA
FNSSYLQGTNQITGR-HexNAc(2)Hex(8)	P04114	1.27454e+07	1.85375e+07	8.5737e+06	2.37489e+07	2.68183e+07	1.31626e+07
FTFTSHTPGDHQICLHSNSTR-HexNAc(4)Hex(5)Fuc(1)NeuAc(2)	Q7Z7H5	NA	2.01797e+07	NA	NA	5.71493e+06	NA
NK-HexNAc(6)Hex(6)Fuc(1)NeuAc(1)	Q4KMQ2	NA	NA	8.10353e+06	NA	NA	1.81248e+06
LLNINPNK-HexNAc(9)Hex(6)	P11279	1.41693e+07	NA	8.8461e+06	1.47067e+08	NA	1.27015e+08
TMVFPVMYLNESVHIDKETASR-HexNAc(2)Hex(9)	Q14108	4.386e+06	NA	6.38626e+06	4.09415e+06	NA	2.67624e+06
EEENGTNTADHVRNSSWAK-HexNAc(8)Hex(3)Fuc(1)	Q6GYQ0	NA	NA	2.37337e+07	NA	NA	1.64585e+07
SHTSPAINDTVIWDRPSR-HexNAc(2)Hex(8)	Q16819	NA	NA	8.71416e+06	NA	NA	3.88996e+06
TLAGENQTAFEIEELNR-HexNAc(2)Hex(8)	P11047	5.90255e+06	NA	NA	19659121	NA	NA
ENK-HexNAc(2)Hex(3)	A0MZ66	NA	NA	2.66664e+06	NA	NA	1.52395e+06
DYYLNK-HexNAc(5)Hex(6)Fuc(1)NeuAc(3)	P42892	NA	NA	6.77486e+06	NA	NA	3.69983e+06
EEEELAYDWSDNNSNISAKR-HexNAc(2)Hex(2)Fuc(1)	Q9UPN3	NA	2.11412e+07	NA	NA	6.14574e+06	NA
NLTLR-HexNAc(5)Hex(6)Fuc(1)NeuAc(2)	P05362	NA	59721979	NA	NA	5.59257e+07	NA
NISQVLEK-HexNAc(2)Hex(9)	O14672	3.15686e+06	3.28638e+06	3.4184e+06	2.16083e+06	2.77242e+06	2.6998e+06
DLGPTLANSTHHNVR-HexNAc(2)Hex(9)	P04062	5.21149e+07	63606277	1.70588e+07	4.38712e+07	5.93156e+07	1.55239e+07
RDPGAAVPGAANASAQQPR-HexNAc(2)Hex(1)	P28300	NA	NA	6.62849e+06	NA	NA	3.77489e+06
HNSTGCLRMK-HexNAc(2)Hex(8)	P10909	NA	NA	7.58437e+06	NA	NA	7.88214e+06
NYTADYDK-HexNAc(2)Hex(7)	O75477	64134271	1.27357e+07	2.29236e+06	7.58762e+07	7.10002e+07	2.42631e+06
ENGTLK-HexNAc(1)Fuc(1)	P18850	NA	NA	4.15845e+06	NA	NA	1.08302e+06
ETIQPFMNK-HexNAc(2)Hex(9)	Q9Y227	2.51605e+07	NA	NA	1.05543e+08	NA	NA
EEENGTNTADHVRNSSWAK-HexNAc(6)Hex(3)	Q6GYQ0	NA	NA	16444239	NA	NA	7.24742e+06
FVEGSHNSTVSLTTK-HexNAc(2)Hex(10)	P04114	1.76111e+07	NA	NA	2.05775e+07	NA	NA
SQNDTVTPDVWYTSKPK-HexNAc(2)Hex(9)	Q9BTY2	4.11916e+07	4.09893e+07	2.19915e+07	2.48606e+07	3.03962e+07	15846137
EEEELAYDWSDNNSNISAK-HexNAc(8)Hex(5)	Q9UPN3	NA	NA	2.78997e+06	NA	NA	4.22593e+06
LKVPESENNK-HexNAc(2)Hex(6)	Q5JRA6	1.88346e+07	2.15318e+07	1.07617e+07	1.32826e+07	1.47709e+07	6.26987e+06
NLNMSR-HexNAc(6)Hex(4)	P38571	NA	2.26427e+07	NA	NA	15803714	NA
EEEELAYDWSDNNSNISAKR-HexNAc(5)Hex(4)Fuc(1)	Q9UPN3	NA	NA	4.02648e+06	NA	NA	4180373
RHEEGHMLNCTCFGQGR-HexNAc(2)Hex(9)	P02751	3.64987e+06	2.07347e+06	NA	1.33947e+06	3.36109e+06	NA
LLSTEGSQNITYHCK-HexNAc(2)Hex(9)	P02458	2.65571e+08	2.92248e+08	1.27122e+08	2.67972e+08	295830492	1.3715e+08
TILVDNNTWNNTHISR-HexNAc(2)Hex(8)	P46977	2.32095e+08	1.62865e+08	1.6016e+08	2.33793e+08	198172832	1.32476e+08
EEDNR-HexNAc(9)Hex(1)Fuc(1)	Q6V702	NA	3.88234e+06	NA	NA	7.65835e+06	NA
NLSSTLESFK-HexNAc(9)Hex(3)	Q86UQ4	7.2782e+07	NA	NA	80370924	NA	NA
HMSLALNR-HexNAc(2)Hex(9)	P06280	NA	9.47846e+06	NA	NA	9.83979e+06	NA
NTSVEHTR-HexNAc(2)Hex(6)	Q96JJ7	5532732	5.11794e+06	NA	2.58901e+06	2.50858e+06	NA
ANATIEVK-HexNAc(2)Hex(7)	Q9Y639	6.71968e+06	NA	8.11498e+06	4.6515e+06	NA	4.82229e+06
EENK-HexNAc(2)Hex(4)	Q5SSJ5	NA	NA	901360	NA	NA	4.43519e+06
VHNFSK-HexNAc(2)Hex(9)	Q92545	NA	2.47295e+06	NA	NA	2.54994e+06	NA
EFANFTFPR-HexNAc(2)Hex(8)	Q96L92	2.97797e+07	NA	NA	2.66604e+06	NA	NA
ENK-HexNAc(5)Hex(5)NeuAc(1)0	A0MZ66	2.14952e+06	NA	NA	4052136	NA	NA
QGKRPSPLSENVSELK-HexNAc(2)Hex(8)	Q99618	NA	NA	354005	NA	NA	2.7096e+08
YETTNK-HexNAc(3)Hex(4)Fuc(1)NeuAc(1)	P13473	1.53416e+07	1.52841e+07	4.86796e+06	1.31843e+06	1.15136e+06	204081
FLQEQNKTK-HexNAc(2)Hex(8)	C9JPN9	1.64968e+07	NA	NA	1.68196e+07	NA	NA
KKEDALNETR-HexNAc(2)Hex(1)	P10909	NA	3.10125e+07	1.34535e+07	NA	8.87936e+06	4.81225e+06
HNNDTQHIWESDSNEFSVIADPR-HexNAc(6)Hex(4)	P14625	4.01222e+07	2.15111e+07	4.2136e+07	6.13684e+06	6010654	8.18693e+06
KQPSPTPGNATGGPLPVSAASQAHQASHQPLYLNHP-HexNAc(2)Hex(7)	Q99941	NA	3.77699e+06	NA	NA	2.25507e+07	NA
NQTLAGEYFHK-HexNAc(2)Hex(10)	Q68CR1	3.29916e+07	NA	NA	2.58894e+07	NA	NA
VQRNITVR-HexNAc(2)Hex(8)	P56199	17736147	1.28392e+07	1.06207e+07	17736147	1.28392e+07	1.06207e+07
QADEDIQGTQNLLTSIESETAASEETLFNASQRISELERNVEELK-HexNAc(3)Hex(4)Fuc(1)	P07942	NA	NA	1.55275e+07	NA	NA	1.53208e+06
NISR-HexNAc(2)Hex(8)	Q96HE7	3.65333e+07	NA	NA	3.45866e+07	NA	NA
TQNFTLLVQGSPELK-HexNAc(2)Hex(9)	P50895	NA	5508512	NA	NA	4.35141e+06	NA
NFTMNEK-HexNAc(2)Hex(9)	Q92820	1.90872e+07	2.10047e+07	NA	2.1154e+07	2.57255e+07	NA
ISSLQTTEKNDTVAGQGER-HexNAc(2)Hex(9)	P06756	1.73756e+07	1.36958e+07	5.38406e+06	1.15208e+07	1.25834e+07	4970422
TVNSNCEINNR-HexNAc(2)Hex(8)	Q15154	NA	8.33105e+07	NA	NA	5.43623e+07	NA
RNESHLIDFR-HexNAc(2)Hex(9)	Q9UJ14	2.78602e+07	2.89535e+07	1.11308e+07	2.17544e+07	2.43057e+07	6.29632e+06
NNGTLYAYIFLHHAGVLPWHDGK-HexNAc(6)Hex(3)	Q96KA5	2.57064e+06	NA	NA	4.99967e+06	NA	NA
ENK-HexNAc(2)Hex(4)	A0MZ66	NA	NA	1739944	NA	NA	977675
NSTVAIKSR-HexNAc(2)Hex(8)	Q9UPP5	8.30195e+06	NA	NA	8.30195e+06	NA	NA
GTNFTHLVADR-HexNAc(2)Hex(9)	Q9C0C4	12894456	1.8189e+07	NA	1.84102e+07	2.29289e+07	NA
LIDNNKTEK-HexNAc(2)Hex(6)	P07602	1.93197e+07	2.24103e+07	7.91869e+06	1.4136e+07	1.31007e+07	4.79882e+06
VIVEGQNAHGEGYVNVTVKPEPR-HexNAc(4)Hex(5)Fuc(1)NeuAc(2)	Q8IZA0	3.48329e+07	NA	NA	3.4657e+07	NA	NA
VNGTPSPIPIISWCGSLDSR-HexNAc(5)Hex(4)NeuAc(1)	Q7Z4H8	NA	9.37512e+06	NA	NA	2.82459e+07	NA
DNATLQATLHAAR-HexNAc(2)Hex(9)	O15230	2.19255e+07	2.75045e+07	1.39391e+07	8.34625e+06	1.20403e+07	7.58826e+06
HNNDTQHIWESDSNEFSVIADPR-HexNAc(2)Hex(4)Fuc(1)	P14625	3.58979e+06	NA	NA	2.73766e+07	NA	NA
AEDYGPVEVISHWHPNITINIVDDHTPWVK-HexNAc(2)Hex(9)	O96005	7.3044e+06	NA	8.37049e+06	3.79764e+06	NA	6493763
KWGHNITEFQQR-HexNAc(2)Hex(7)	Q96HE7	NA	4.93547e+06	NA	NA	5.77966e+06	NA
VNNTLSSQISR-HexNAc(2)Hex(6)	P11047	2.04414e+07	1.86685e+07	7.12506e+06	1.30782e+07	1.96059e+07	7.79745e+06
ANHSLDVSFYFR-HexNAc(2)Hex(1)	P78357	NA	NA	984541	NA	NA	1932670
NQTAVR-HexNAc(2)Hex(9)	Q13443	NA	1.31546e+07	NA	NA	11065671	NA
SEIHSINITIER-HexNAc(2)Hex(8)	Q86XX4	1.54657e+07	NA	NA	5.41253e+06	NA	NA
ENK-HexNAc(2)Hex(4)Fuc(1)	A0MZ66	NA	8.17758e+06	NA	NA	1022882	NA
GHTLTLNFTR-HexNAc(3)Hex(6)NeuAc(1)	P11279	1.02293e+08	7.51421e+07	4.32349e+07	8.70096e+07	83778744	4.18514e+07
VNQTFNWNTTK-HexNAc(2)Hex(6)	P33681	NA	NA	7.18709e+06	NA	NA	7.3406e+06
EEDNR-HexNAc(4)Hex(5)	Q6V702	NA	4.08481e+07	NA	NA	6953433	NA
EEEELAYDWSDNNSNISAK-HexNAc(5)Hex(6)Fuc(1)NeuAc(1)	Q9UPN3	NA	NA	5.47997e+06	NA	NA	3103872
TPEFHPNK-HexNAc(2)Hex(1)	Q96S16	NA	7.37216e+06	NA	NA	1.19711e+07	NA
NVTWK-HexNAc(6)Hex(7)NeuAc(3)	P50454	NA	NA	3.30601e+06	NA	NA	3.40722e+06
DQPGHPVNRTIYWIDYIIR-HexNAc(6)Hex(3)	Q16880	2.28151e+06	NA	NA	3.23381e+06	NA	NA
YHSQTYGNGSK-HexNAc(2)Hex(9)	Q13438	1.28449e+07	NA	5.41418e+06	1.92607e+07	NA	5.66441e+06
NITLR-HexNAc(6)Hex(7)NeuAc(4)	Q9UHN6	5.1975e+06	NA	NA	1.91087e+08	NA	NA
HNNDTQHIWESDSNEFSVIADPR-HexNAc(6)Hex(8)NeuAc(1)	P14625	NA	9.82758e+06	NA	NA	5.25044e+06	NA
HAILVGNHSSR-HexNAc(2)Hex(9)	Q6UWL2	552555	NA	5.54009e+06	1.1788e+06	NA	6.84834e+06
NISDGFDGIPDNVDAALALPAHSYSGR-HexNAc(2)Hex(9)	P04004	1.14903e+07	NA	3277978	1.26433e+07	NA	6.43941e+06
KPDPAEQQNVTQVAHSPQGYNTAR-HexNAc(5)Hex(6)Fuc(1)NeuAc(3)	O00461	4.66558e+06	NA	NA	913030	NA	NA
IAPASNVSHTVVLR-HexNAc(2)Hex(9)	P43308	3.24092e+07	4.29033e+07	2.31528e+07	67348157	6.8882e+07	3.58041e+07
EDALNETR-HexNAc(3)Hex(6)	P10909	NA	2.65652e+06	NA	NA	3.53365e+06	NA
GHTLTLNFTR-HexNAc(4)Hex(7)NeuAc(1)0	P11279	5.86436e+07	NA	NA	2.22539e+07	NA	NA
AGAGDFMRYHYNGSLMDGTLFDSSYSRNHTYNTYIGQGYIIPGMDQGLQGACMGER-HexNAc(7)Hex(7)Fuc(1)NeuAc(2)	Q96AY3	NA	NA	1.72803e+07	NA	NA	6.55804e+06
KEDALNETR-HexNAc(7)Hex(8)NeuAc(1)	P10909	NA	NA	705551	NA	NA	803507
YPHKPEINSTTHPGADLQENFCR-HexNAc(2)Hex(10)	P00734	1.13018e+07	NA	NA	4.18411e+07	NA	NA
NLEKNSTK-HexNAc(2)Hex(5)Fuc(1)	P07602	2.6552e+06	2.40264e+06	NA	1.95474e+06	1.68128e+06	NA
DLGPTLANSTHHNVR-HexNAc(5)Hex(6)Fuc(1)NeuAc(3)	P04062	2.83502e+07	2.9677e+07	NA	1.53931e+07	1.50569e+07	NA
AQAVETNK-HexNAc(2)Hex(1)	P11150	NA	5.16778e+06	NA	NA	1.94315e+06	NA
RYNNGTWYK-HexNAc(2)Hex(8)	P25391	9.89994e+06	NA	NA	2.12572e+07	NA	NA
QNISTLPLSSYTLGHPAPVR-HexNAc(7)Hex(4)	Q7Z443	NA	NA	4.94718e+07	NA	NA	1.1256e+08
IAPASNVSHTVVLR-HexNAc(2)Hex(8)	P43308	2.59441e+07	2.51321e+07	NA	46110757	4.89679e+07	NA
DNDSLAAR-HexNAc(4)Hex(5)NeuAc(2)	P54886	NA	2.84949e+07	NA	NA	4863533	NA
ANHSGAVVLLK-HexNAc(4)Hex(6)NeuAc(1)	P23229	NA	6067961	NA	NA	6.57017e+06	NA
LIDNNKTEK-HexNAc(2)Hex(8)	P07602	5.12525e+07	5.44487e+07	1.4392e+07	2.45731e+07	2.45868e+07	6.81325e+06
AESFNFSSSGR-HexNAc(2)Hex(9)	Q3MIT2	NA	NA	2.72328e+07	NA	NA	1.38187e+07
RAEDYGPVEVISHWHPNITINIVDDHTPWVK-HexNAc(2)Hex(9)	O96005	1.23937e+07	8.96819e+06	1.37801e+07	7.66222e+06	1.04367e+07	9.17031e+06
GINESYK-HexNAc(2)Hex(4)	P50897	NA	NA	3.30744e+06	NA	NA	2.7207e+06
AMSSNETAAYK-HexNAc(2)Hex(9)	Q8TCJ2	1.90931e+07	1.10132e+08	2.77941e+07	1.72525e+07	280297931	1.6951e+07
IQDHFNSSIK-HexNAc(2)Hex(7)	Q9UHL0	33684599	NA	NA	2.65238e+06	NA	NA
ENK-HexNAc(4)Hex(6)Fuc(1)	A0MZ66	NA	7.75762e+06	NA	NA	7.60967e+06	NA
SYHNQTISFR-HexNAc(2)Hex(8)	Q68CR1	1.56253e+07	1.4824e+07	7.00017e+06	1.76623e+07	1.93837e+07	9.26619e+06
YHYNGSLMDGTLFDSSYSR-HexNAc(2)Hex(8)	Q96AY3	1.24177e+07	1.75206e+07	9.8788e+06	6917974	1.01969e+07	8.24664e+06
DHPNATVWR-HexNAc(2)Hex(9)	Q9UMR5	9.6911e+06	7314821	NA	1.01401e+07	7.40211e+06	NA
YRPENSVANDTGFTVVAPGK-HexNAc(2)Hex(9)	O60911	NA	1.34311e+07	NA	NA	4.91967e+06	NA
GTNYTVR-HexNAc(2)Hex(8)	P07942	1.2606e+08	1.63607e+08	6.6693e+07	1.31066e+08	1.66392e+08	6.71546e+07
GHVNITR-HexNAc(7)Hex(3)	P00734	NA	2.3143e+07	NA	NA	2.3143e+07	NA
GHVNITR-HexNAc(2)Hex(1)	P00734	NA	9.18628e+07	1.35433e+07	NA	9.24422e+07	1.31747e+07
KNNTYLVK-HexNAc(4)Hex(5)Fuc(1)	Q6P4E1	NA	3.11839e+07	NA	NA	1.68561e+07	NA
VQPFNVTQGK-HexNAc(5)Hex(6)Fuc(1)NeuAc(3)	P13473	23468029	2.3893e+07	2.35782e+07	4.2477e+07	4.95003e+07	4.00861e+07
FRKTNHSSPEAQSK-HexNAc(2)Hex(9)	O95819	3.83957e+06	NA	NA	1.08597e+08	NA	NA
ETHFDTQNNISTMSAEWVSKANAK-HexNAc(2)Hex(6)	Q9H2U1	2.49935e+07	NA	NA	1.6238e+07	NA	NA
RDHHGANFSCRTELDLRPQGLELFENTSAPYQLQTFVLPATPPQLVSPR-HexNAc(5)Hex(3)Fuc(1)NeuAc(1)	P05362	1.43069e+07	NA	NA	1.33234e+07	NA	NA
AANGSLR-HexNAc(4)Hex(4)NeuAc(1)	P11279	NA	NA	2.60206e+06	NA	NA	4.76577e+06
SYNETK-HexNAc(2)Hex(9)	P04114	1.26536e+07	NA	NA	7.16869e+06	NA	NA
KEDWNNVTKAESMGLLSEDPK-HexNAc(2)Hex(9)	Q8NCM2	39270034	NA	NA	1.1688e+07	NA	NA
SAEGTFFINK-HexNAc(2)Hex(8)	P06865	1.03153e+07	1.44163e+07	8.10586e+06	6.51288e+06	9.82341e+06	7.85796e+06
ENK-HexNAc(3)Hex(5)Fuc(1)	A0MZ66	13895496	NA	NA	3.40619e+07	NA	NA
DNHTHSDIQVK-HexNAc(2)Hex(3)Fuc(1)	Q8IV08	6.17941e+06	6.71922e+06	NA	3.84607e+06	4.66633e+06	NA
VNNLSLCLTLK-HexNAc(2)Hex(8)	Q9UPN3	NA	1.00064e+07	NA	NA	5.5308e+06	NA
EENK-HexNAc(5)Hex(4)NeuAc(1)	Q5SSJ5	NA	NA	8.42255e+06	NA	NA	597201
KNASNMEYR-HexNAc(5)Hex(6)Fuc(1)NeuAc(2)	Q9Y639	NA	3.39099e+07	NA	NA	10570716	NA
GHTLTLNFTR-HexNAc(4)Hex(7)NeuAc(1)	P11279	3.28325e+07	4.34976e+07	NA	5.51591e+07	6.04255e+07	NA
TILVDNNTWNNTHISR-HexNAc(2)Hex(9)	P46977	7.67274e+08	6.74423e+08	4.9638e+08	6.45014e+08	6.03454e+08	4.13797e+08
GNVTQHVQGHR-HexNAc(6)Hex(7)Fuc(1)NeuAc(3)	Q15043	3.26232e+06	1.92245e+08	NA	2.74913e+07	374413890	NA
YHTESLQNMSK-HexNAc(2)Hex(9)	O94992	NA	536410	NA	NA	14751455	NA
NQTNLER-HexNAc(2)Hex(1)	Q8NBJ4	NA	9.91379e+06	4.25643e+06	NA	5.13917e+06	2.29992e+06
VNNTAVIEK-HexNAc(2)Hex(8)	Q9H330	1.94612e+07	2.27589e+07	7262235	7.58304e+06	8.05857e+06	4.22683e+06
EEEELAYDWSDNNSNISAK-HexNAc(6)Hex(3)	Q9UPN3	NA	NA	3864298	NA	NA	9.69229e+06
IPNNTQWVTWSPVGHK-HexNAc(5)Hex(6)Fuc(1)NeuAc(3)	P27487	NA	5.16714e+07	NA	NA	1.35534e+08	NA
NR-HexNAc(3)Hex(6)NeuAc(1)	Q4KMQ2	NA	NA	737775	NA	NA	2.40086e+07
FVNDTK-HexNAc(2)Hex(9)	P78536	1.02435e+07	1.24468e+07	NA	9.61783e+06	1.15839e+07	NA
DPGAAVPGAANASAQQPR-HexNAc(2)Hex(7)	P28300	NA	9.00053e+07	1.80884e+07	NA	2.9288e+07	1.25549e+07
NNHTASILDR-HexNAc(8)Hex(9)Fuc(1)NeuAc(4)	P08962	NA	9.79174e+06	NA	NA	3.95461e+06	NA
PENDSK-HexNAc(8)Hex(3)	Q99523	NA	NA	624970	NA	NA	1.27993e+06
EDALNETR-HexNAc(8)Hex(9)Fuc(1)NeuAc(4)	P10909	2.60544e+07	NA	8989022	8.70774e+06	NA	6.06122e+06
NASEMIDK-HexNAc(2)Hex(6)	P36542	4.83293e+06	NA	NA	4.01354e+07	NA	NA
KNASNMEYR-HexNAc(6)Hex(7)Fuc(1)NeuAc(3)	Q9Y639	NA	2.39268e+06	NA	NA	1.64248e+06	NA
NQTLR-HexNAc(2)Hex(8)	P38435	3.17533e+07	NA	NA	3.32123e+07	NA	NA
PLHSSGINVNAAPFQSMQTVFNMNAPVPPVNEPETLKQQNQYQASYNQSFSSQPHQVEQTELQQEQLQTVVGTYHGSPDQSHQVTGNHQQPPQQNTGFPR-HexNAc(7)Hex(7)Fuc(1)NeuAc(2)	Q14444	NA	NA	867168	NA	NA	3.92489e+07
NDTLQEAK-HexNAc(4)Hex(5)NeuAc(2)	Q92896	8.60942e+06	7.42746e+07	3.09793e+07	2.1014e+07	3.04523e+06	2.04173e+06
SSNLTEHR-HexNAc(2)Hex(7)	Q8TD23	NA	4.81981e+06	NA	NA	2.44935e+06	NA
ENK-HexNAc(2)Hex(1)	A0MZ66	NA	5.99941e+06	2310770	NA	5.76086e+06	949817
NK-HexNAc(7)Hex(6)Fuc(1)NeuAc(4)	Q4KMQ2	NA	NA	921577	NA	NA	3.85877e+07
YTSYNVSEK-HexNAc(2)Hex(8)	Q86XX4	1.40393e+07	1.52912e+07	5.66814e+06	8243302	6.50382e+06	3.54424e+06
ANHSLDVSFYFR-HexNAc(2)Hex(9)	P78357	NA	5.74208e+06	2.68774e+06	NA	5.74574e+06	644322
EEEELAYDWSDNNSNISAK-HexNAc(4)Hex(6)Fuc(1)	Q9UPN3	NA	NA	485373	NA	NA	8.50906e+06
DYYLNK-HexNAc(2)Hex(9)	P42892	1.97186e+07	3.65493e+07	1.03356e+07	1.51754e+07	1.65666e+07	6.01399e+06
ANTTQPGIVEGGQVLK-HexNAc(4)Hex(5)Fuc(1)NeuAc(1)0	P06756	1.06126e+08	NA	NA	5.14426e+07	NA	NA
ANATIEVK-HexNAc(2)Hex(8)	Q9Y639	1.20523e+08	2.58966e+08	6.31011e+07	1.04807e+08	2.16236e+08	4.05866e+07
SPIVTHCNVSTVNK-HexNAc(2)Hex(8)	Q9UN76	6.56517e+06	8.67601e+06	NA	1.22912e+07	1.5245e+07	NA
NQTAVR-HexNAc(3)Hex(6)NeuAc(1)	Q13443	NA	1.08434e+07	NA	NA	4.81728e+06	NA
SISENATATAAPK-HexNAc(2)Hex(8)	Q9UBS9	NA	1.13096e+07	NA	NA	6.70021e+06	NA
VAAANVSVTQPESTGDPNNMTLLAEEAR-HexNAc(8)Hex(7)	P11047	NA	17653310	NA	NA	8.73372e+06	NA
FNSTQIAAMAPEHEEPR-HexNAc(2)Hex(9)	Q4G148	5075726	4.41889e+06	6.32799e+06	2.36909e+06	4251184	1.8815e+06
EENK-HexNAc(6)Hex(3)Fuc(1)NeuAc(1)	Q5SSJ5	NA	NA	849573	NA	NA	1.20934e+06
RDPGAAVPGAANASAQQPR-HexNAc(2)Hex(8)	P28300	8.34604e+07	6.08718e+07	3.13116e+07	6.05779e+07	5.80005e+07	2.46544e+07
NYTADYDK-HexNAc(8)Hex(8)Fuc(1)	O75477	NA	4.93697e+07	NA	NA	3.99306e+06	NA
ENK-HexNAc(2)Hex(2)Fuc(1)	A0MZ66	1.74067e+07	53416717	1.37259e+08	2670261	15072887	1.06364e+07
SYNETK-HexNAc(2)Hex(7)	P04114	3.36326e+06	3.53264e+06	NA	2.92872e+06	2.76392e+06	NA
LQQDVLQFQKNQTNLER-HexNAc(4)Hex(5)Fuc(1)NeuAc(2)	Q8NBJ4	3.67405e+06	9.70724e+06	NA	583198	2.30767e+06	NA
VQPFNVTQGK-HexNAc(2)Hex(1)	P13473	NA	NA	2.3477e+06	NA	NA	3.1698e+06
NDTLQEAK-HexNAc(4)Hex(5)Fuc(1)NeuAc(2)	Q92896	7.62866e+07	4.96162e+06	4.86991e+07	1.63732e+06	3.01479e+07	327682
QPHGGQQKPSYGSGYQSHQGQQQSYNQSPYSNYGPPQGK-HexNAc(2)Hex(2)Fuc(1)	Q12906	7.7383e+06	NA	NA	7.32653e+06	NA	NA
HFNR-HexNAc(2)Hex(10)	Q99941	7.78701e+06	NA	NA	7.85481e+06	NA	NA
NCSAAPQPEPAAGLASYPELR-HexNAc(5)Hex(4)Fuc(1)NeuAc(2)	O75718	4.66503e+07	NA	NA	4.9808e+06	NA	NA
HERNYTK-HexNAc(2)Hex(8)	Q8TD23	NA	2.00715e+07	NA	NA	2.02788e+07	NA
AVNKTTNSK-HexNAc(2)Hex(9)	Q8TB92	NA	3.97552e+06	NA	NA	2.79488e+06	NA
RAQAVETNK-HexNAc(2)Hex(10)	P11150	1.51165e+07	NA	NA	5.78174e+06	NA	NA
QEGAQQTPSLVSVITAVTQCYYWEIHNQTWSSAGCQVGPQSTILRTQCLCNHLTFFASDFFVVPR-HexNAc(4)Hex(4)Fuc(1)NeuAc(1)	Q7Z443	NA	NA	5.73128e+06	NA	NA	695874
LLNGSQR-HexNAc(2)Hex(9)	Q32P28	5.34484e+07	6.65815e+07	2.04128e+07	5.20408e+07	5.47128e+07	2.34256e+07
IQNILSEKPTVTTVYANNGSVLQGSSVASVYDGK-HexNAc(2)Hex(9)	Q15165	8.68045e+06	9.52208e+06	NA	6.01619e+06	6.26672e+06	NA
EENK-HexNAc(3)Hex(3)	Q5SSJ5	NA	3.74501e+06	NA	NA	1.75239e+07	NA
SDSPSTSSIPPLNETVSAASLLTTTNQHSSSLGGLSHSEEIPNTTTTQHSSTLSTQQNTLSSSTSSGR-HexNAc(1)	Q14157	1.49511e+07	NA	6.17209e+06	6.55032e+06	NA	2.63756e+06
GHVNITR-HexNAc(2)Hex(10)	P00734	8.972e+07	NA	NA	9.20416e+07	NA	NA
AVNKTTNSK-HexNAc(2)Hex(6)	Q8TB92	2.55913e+06	2.47517e+06	NA	4.69424e+06	3.9629e+06	NA
NPCTSEQNCTSPFSYK-HexNAc(2)Hex(8)	P05556	1.14705e+07	NA	1.01817e+07	1.47092e+07	NA	6.6826e+06
LIDNNK-HexNAc(2)Hex(7)	P07602	NA	2.8492e+06	NA	NA	651661	NA
SQNRPQGQSTQPSNAAGTNTTSASTPR-HexNAc(2)	Q9UHD9	51946554	4.89228e+07	2.03716e+07	8.74664e+07	8.15687e+07	3.58179e+07
ENLSYDLVPLK-HexNAc(5)Hex(6)NeuAc(3)	Q92598	NA	NA	1.23265e+06	NA	NA	2.91529e+06
EEEELAYDWSDNNSNISAKRNYFSELTMELEEK-HexNAc(3)Hex(3)	Q9UPN3	NA	NA	68782166	NA	NA	1.70633e+06
YHTESLQNMSK-HexNAc(2)Hex(7)	O94992	703419	325950	928638	53219483	6.46837e+07	2.76404e+07
EEDNR-HexNAc(2)Hex(7)	Q6V702	NA	3.47387e+06	NA	NA	2.11679e+07	NA
HTNMNLTQLK-HexNAc(6)Hex(9)	Q15165	358417	1.62958e+06	1.58461e+06	3.61224e+07	4.90025e+07	2.18255e+07
NDTLQEAK-HexNAc(2)Hex(8)	Q92896	NA	NA	1.4297e+07	NA	NA	2.17326e+06
NQTNLER-HexNAc(2)Hex(10)	Q8NBJ4	9.24312e+06	NA	NA	4.36934e+06	NA	NA
RRDPGAAVPGAANASAQQPR-HexNAc(2)Hex(8)	P28300	1.4247e+07	1.71277e+07	9.22672e+06	1.06276e+07	1.31073e+07	6.95984e+06
DSCESNHNITCK-HexNAc(2)Hex(9)	P56199	NA	5.70714e+06	NA	NA	6.76593e+06	NA
LYANHTSLPASAR-HexNAc(2)Hex(10)	Q9NRB3	1.05721e+07	NA	NA	14196418	NA	NA
VIVTSKHNNDTQHIWESDSNEFSVIADPR-HexNAc(5)Hex(4)Fuc(1)NeuAc(2)	P14625	NA	NA	13083080	NA	NA	1.75176e+06
NNQTECFNHVR-HexNAc(2)Hex(1)	Q9NTN9	NA	4.80942e+06	NA	NA	8.79607e+06	NA
RRDPGAAVPGAANASAQQPR-HexNAc(2)Hex(6)	P28300	3.79508e+06	4.78919e+06	1.6946e+06	1.42607e+06	1.62837e+06	286814
NNISLVK-HexNAc(2)Hex(10)	Q9UHN6	1.73288e+07	NA	NA	2.25895e+07	NA	NA
FNSSYLQGTNQITGR-HexNAc(6)Hex(4)	P04114	6.63112e+07	6.7234e+07	NA	5.049e+07	6.38096e+07	NA
EEEENLTRK-HexNAc(7)Hex(7)Fuc(1)NeuAc(4)	P56277	NA	NA	1.89291e+06	NA	NA	2.03156e+06
KLFKNK-HexNAc(2)Hex(6)	Q9NXT0	NA	1.49004e+06	NA	NA	1.49004e+06	NA
GKDLDTDFTNNASQPETK-HexNAc(4)Hex(5)Fuc(1)NeuAc(2)	O75976	1.89515e+07	2.19551e+07	5.3029e+07	6.23877e+06	2.65562e+06	7.62805e+07
TSNSSQVSNEQDKIDAYK-HexNAc(2)Hex(6)	Q5JRA6	3.45112e+07	4.17803e+07	2.39836e+07	2.23315e+07	2.54203e+07	1.11315e+07
TLSELMSQTGHLGLANASAPSGEQLLR-HexNAc(2)Hex(6)	O15230	NA	NA	5.48037e+08	NA	NA	1.28745e+08
YHYNGTFEDGK-HexNAc(2)Hex(8)	Q96AY3	1.57876e+08	1.46756e+08	5.84986e+07	1.05905e+08	1.00151e+08	4.29984e+07
NESDLIEK-HexNAc(6)Hex(5)	Q8NF91	NA	NA	4.22496e+06	NA	NA	59285.3
EEEAIQLDGLNASQIRELREK-HexNAc(2)Hex(4)	P14625	NA	NA	4.63221e+07	NA	NA	8.30928e+06
EMEAELNSTMK-HexNAc(3)Hex(6)	Q56P03	NA	2.99176e+06	1.29472e+06	NA	1.0047e+08	6.8538e+07
KEMEMLWNK-HexNAc(2)Hex(8)	A0A1B0GTZ2	NA	NA	2.63687e+06	NA	NA	1.93688e+07
IAPASNVSHTVVLRPLK-HexNAc(2)Hex(8)	P43308	4.06628e+08	1.54051e+07	1.65447e+08	747065172	1.54051e+07	3.12815e+08
KGTNFTHLVADR-HexNAc(2)Hex(1)	Q9C0C4	NA	4.03163e+06	NA	NA	1395821	NA
YHVLHINTTK-HexNAc(2)Hex(1)	Q7LGA3	NA	5.28408e+06	1.19119e+06	NA	2.16168e+07	1.18774e+06
VIVTSKHNNDTQHIWESDSNEFSVIADPR-HexNAc(5)Hex(4)Fuc(1)	P14625	2.51883e+06	NA	NA	8.56066e+06	NA	NA
LKCQENTSK-HexNAc(2)Hex(7)	Q96KX1	NA	1.82752e+07	4.63037e+06	NA	3.4167e+08	1.2811e+08
TVLTPATNHMGNVTFTIPANR-HexNAc(2)Hex(10)	P01024	7.34004e+06	NA	NA	1.28357e+07	NA	NA
EDPSPENR-HexNAc(4)Hex(5)	Q01826	NA	2.29368e+06	NA	NA	1.30038e+07	NA
EENK-HexNAc(6)Hex(7)Fuc(1)	Q5SSJ5	NA	3.51865e+06	NA	NA	1.54332e+07	NA
EEEELAYDWSDNNSNISAKR-HexNAc(2)Hex(4)Fuc(1)	Q9UPN3	NA	NA	1.55454e+06	NA	NA	4.78889e+06
KLNYTLSQGHR-HexNAc(3)Hex(6)NeuAc(1)	P15144	7.935e+06	9.74516e+06	5.92639e+06	8.11258e+06	1.01973e+07	5.15776e+06
VNNLSLCLTLK-HexNAc(2)Hex(9)	Q9UPN3	NA	NA	3.38597e+06	NA	NA	3.38597e+06
YNCSIESPR-HexNAc(2)Hex(9)	O00469	1.90307e+07	2.15383e+07	1.05363e+07	2.62585e+07	3.10984e+07	1.35528e+07
ANISHK-HexNAc(2)Hex(10)	P01031	1.77719e+07	NA	NA	1.34617e+07	NA	NA
NFTSAK-HexNAc(2)Hex(10)	O43405	5.53883e+06	NA	NA	1.08963e+07	NA	NA
NVTR-HexNAc(5)Hex(6)NeuAc(1)	P05556	NA	3.58937e+07	NA	NA	2.27656e+07	NA
HNNDTQHIWESDSNEFSVIADPR-HexNAc(2)Hex(8)	P14625	314458990	1854300457	8.88777e+08	4.06855e+07	744498196	464458991
EENK-HexNAc(6)Hex(7)Fuc(1)NeuAc(3)	Q5SSJ5	NA	8.39411e+06	541972	NA	260014	5.1455e+06
NVTWK-HexNAc(2)Hex(8)	P50454	2.81163e+07	5.97135e+08	1.81961e+07	3.66287e+07	6.45445e+08	1.81961e+07
EEQGKVYVYALNQTR-HexNAc(2)	P56199	1.74664e+06	NA	NA	1.9056e+06	NA	NA
SQNRPQGQSTQPSNAAGTNTTSASTPR-HexNAc(1)	Q9UHD9	2.30082e+07	2.33793e+07	9.05009e+06	3.85648e+07	3.42087e+07	1.60734e+07
AVNK-HexNAc(5)Hex(3)	Q8TB92	5.74762e+06	NA	NA	5.94421e+06	NA	NA
KLNYTLSQGHR-HexNAc(4)Hex(5)NeuAc(1)	P15144	1.3058e+07	2.16214e+07	NA	4.66692e+06	3.36862e+07	NA
HNNDTQHIWESDSNEFSVIADPR-HexNAc(3)Hex(6)Fuc(1)	P14625	NA	4315437	NA	NA	6.04541e+06	NA
SANSTLAQALHWTR-HexNAc(2)Hex(9)	Q9BU23	2.24597e+07	2.33846e+07	NA	38015572	4.20185e+07	NA
NVTR-HexNAc(8)Hex(9)	P05556	NA	5.36894e+06	NA	NA	909491	NA
NVSR-HexNAc(6)Hex(7)Fuc(1)NeuAc(2)	P78536	NA	1.47483e+06	NA	NA	2.99608e+07	NA
EDPSPENR-HexNAc(2)Hex(5)	Q01826	NA	5.58028e+06	NA	NA	8.83472e+06	NA
YHYNGTLLDGTSFDTSYSK-HexNAc(3)Hex(6)NeuAc(1)	Q96AY3	3.45049e+06	NA	NA	2.27523e+07	NA	NA
AQAVETNK-HexNAc(2)Hex(9)	P11150	6.34288e+06	8.07649e+06	NA	2.81856e+06	5.53718e+06	NA
GHTLTLNFTRNATR-HexNAc(4)Hex(4)	P11279	NA	8.22199e+07	NA	NA	8.22199e+07	NA
NESVR-HexNAc(2)Hex(9)	Q92542	NA	9.152e+06	NA	NA	2.94451e+07	NA
EEDNR-HexNAc(4)Hex(4)	Q6V702	NA	8.06524e+06	NA	NA	7.10912e+06	NA
LLNGSQR-HexNAc(2)Hex(8)	Q32P28	4.76727e+07	5.34286e+07	2.30358e+07	5.43414e+07	6.02957e+07	2.58325e+07
VEDNFSWDEK-HexNAc(2)Hex(1)	Q8NF99	NA	NA	1.55275e+07	NA	NA	1.33435e+06
EEEENLTR-HexNAc(8)Hex(3)Fuc(1)	P56277	NA	NA	2.24327e+07	NA	NA	3.9426e+06
PVHHFMNTSTFTEYTVVDESSVAK-HexNAc(2)Hex(9)	P40394	NA	1.53766e+07	NA	NA	94840460	NA
RNWTITR-HexNAc(2)Hex(9)	P19022	77407728	8.83156e+07	NA	8.36487e+07	1.05996e+08	NA
NYTADYDK-HexNAc(4)Hex(4)Fuc(1)NeuAc(1)0	O75477	4.26015e+06	NA	NA	7.01499e+07	NA	NA
KKEDALNETR-HexNAc(4)Hex(3)Fuc(1)	P10909	NA	6.95351e+06	NA	NA	2.12406e+06	NA
TVLTPATNHMGNVTFTIPANR-HexNAc(2)Hex(1)	P01024	NA	5.85801e+06	NA	NA	1.45265e+07	NA
FTFTSHTPGEHQICLHSNSTK-HexNAc(2)Hex(6)	Q9BVK6	6.53004e+07	7.1486e+07	27900505	49969099	5.39887e+07	2.23204e+07
IQNILSEKPTVTTVYANNGSVLQGSSVASVYDGK-HexNAc(2)Hex(6)	Q15165	7.14432e+06	1.05473e+07	3.79276e+06	1.28921e+07	1.05034e+07	6.16789e+06
KHPDASVNFSEFSK-HexNAc(5)Hex(8)Fuc(1)	P09429	7.09465e+06	NA	NA	5.73998e+06	NA	NA
LNSSTIK-HexNAc(6)Hex(7)NeuAc(1)0	P13473	1.70672e+08	NA	NA	1.30417e+08	NA	NA
ANDTSYIR-HexNAc(2)Hex(7)	P20774	188682	NA	2.21892e+06	1.04465e+07	NA	2.1462e+07
KRPRWTPDDYINMTSDCSSFIK-HexNAc(2)Hex(8)	Q02742	NA	NA	6.87604e+07	NA	NA	1.95758e+06
NR-HexNAc(7)Hex(8)Fuc(1)NeuAc(4)	Q4KMQ2	NA	NA	530798	NA	NA	3.70013e+07
ENK-HexNAc(3)Hex(3)	A0MZ66	NA	NA	1.7188e+06	NA	NA	2.67909e+06
EEEELAYDWSDNNSNISAKR-HexNAc(3)Hex(6)Fuc(1)NeuAc(1)	Q9UPN3	NA	NA	2756432	NA	NA	9.0175e+06
EENK-HexNAc(4)Hex(4)	Q5SSJ5	4.0503e+06	NA	NA	4.85273e+06	NA	NA
NVTWK-HexNAc(6)Hex(7)NeuAc(1)	P50454	NA	NA	9.02047e+06	NA	NA	1.03746e+07
YSLNVTYNYPVHYFDGR-HexNAc(2)Hex(1)	Q9NV96	NA	NA	3.54166e+06	NA	NA	2.57536e+06
YHYNGTFEDGKK-HexNAc(2)Hex(9)	Q96AY3	5.15436e+06	5.14784e+06	7.27882e+06	2.55683e+06	2.94546e+06	6.47173e+06
RDPGAAVPGAANASAQQPR-HexNAc(2)Hex(10)	P28300	1.167e+07	NA	NA	2.90971e+06	NA	NA
HNNDTQHIWESDSNEFSVIADPR-HexNAc(6)Hex(3)	P14625	5.60914e+07	1.95217e+07	NA	1.61113e+07	6.03617e+06	NA
NISQDLEK-HexNAc(2)Hex(8)	P11047	6.62458e+07	7.10922e+07	3.82312e+07	3.44855e+07	3.20125e+07	1.87759e+07
YIHQNYTK-HexNAc(2)Hex(6)	Q02809	2.28782e+06	NA	NA	2.22636e+06	NA	NA
KGDGGGAGGGGGGGGSGGGGSGGGGGGGSSRPPAPQENTTSEAGLPQGEAR-HexNAc(6)Hex(7)Fuc(1)NeuAc(1)	Q9UKM9	NA	6.18601e+07	NA	NA	3.83092e+07	NA
ENYSHHTQDDR-HexNAc(2)Hex(2)	Q92804	3.56891e+07	3.97786e+07	NA	3.09746e+06	5.53479e+06	NA
NNHTASILDR-HexNAc(1)Fuc(1)	P08962	3.54808e+06	NA	NA	1.6123e+06	NA	NA
SQNDTVTPDVWYTSKPK-HexNAc(2)Hex(10)	Q9BTY2	3.4079e+07	NA	NA	2.30141e+07	NA	NA
EEEELAYDWSDNNSNISAKR-HexNAc(4)Hex(4)NeuAc(1)	Q9UPN3	NA	NA	1.59539e+06	NA	NA	3.4176e+06
EEDAGEWITVNQTTTANRYLK-HexNAc(6)Hex(7)Fuc(1)NeuAc(1)	P54296	NA	NA	8.65913e+06	NA	NA	3.51531e+07
VTNSNANAASPLIVAGYNVSGSVR-HexNAc(2)Hex(9)	P69849	NA	5.22552e+07	NA	NA	1.20963e+08	NA
IQNILSEKPTVTTVYANNGSVLQGSSVASVYDGK-HexNAc(3)Hex(5)Fuc(1)	Q15165	5638002	NA	NA	1.44112e+06	NA	NA
AAAAAAATAVDEESPFLVAVENGSAPSEPGLVCEPPQPEEEELREEEVADEEASQEWHAEAPGGGDR-HexNAc(2)Fuc(1)	Q5TGJ6	NA	NA	4.518e+07	NA	NA	1.04476e+06
AMFVMNCSINK-HexNAc(2)Hex(8)	Q56P03	3722962	1.52794e+06	3.96377e+06	57398373	9.2798e+07	3.8284e+07
LANNTHQHVFDDLR-HexNAc(5)Hex(6)Fuc(1)NeuAc(3)	Q99523	3.43526e+07	4.24354e+07	25572934	706638	801810	110025
NKSK-HexNAc(4)Hex(6)Fuc(1)NeuAc(1)	Q4KMQ2	NA	NA	3.98449e+06	NA	NA	3.98449e+06
NR-HexNAc(6)Hex(7)Fuc(1)NeuAc(2)	Q4KMQ2	NA	NA	1.61215e+06	NA	NA	1.20445e+06
NESDLIEK-HexNAc(7)Hex(8)Fuc(1)NeuAc(4)	Q8NF91	NA	NA	4685722	NA	NA	522350
NTSVEHTR-HexNAc(2)Hex(7)	Q96JJ7	5.35143e+06	5.88371e+06	NA	2.53263e+06	4.28754e+06	NA
NKYETEINITK-HexNAc(2)Hex(6)	P15924	NA	NA	2.00844e+08	NA	NA	1.61418e+06
NPCTSEQNCTSPFSYK-HexNAc(2)Hex(7)	P05556	7.23874e+06	NA	NA	7.57902e+06	NA	NA
VASVININPNTTHSTGSCR-HexNAc(6)Hex(7)Fuc(1)NeuAc(1)	P13473	3.9976e+07	1.75415e+08	2.44308e+07	1.21145e+08	6.40775e+07	8.18813e+07
EEEENLTRK-HexNAc(5)Hex(6)NeuAc(1)	P56277	NA	NA	6.12907e+06	NA	NA	1.76331e+06
VTNSNANAASPLIVAGYNVSGSVR-HexNAc(3)Hex(6)NeuAc(1)	Q15155	NA	NA	1.18141e+08	NA	NA	4.3448e+07
FHIYNGTR-HexNAc(2)Hex(9)	Q93008	8.11291e+06	NA	NA	8.11291e+06	NA	NA
YIHQNYTK-HexNAc(2)Hex(9)	Q02809	5.24547e+07	161049038	3.26341e+07	7.06432e+07	2.56423e+08	4.52465e+07
EEEPVFTRQDSNRSEK-HexNAc(8)Hex(5)	Q9Y520	NA	NA	4.27124e+07	NA	NA	8.05836e+06
ENK-HexNAc(2)Hex(2)	A0MZ66	NA	NA	5.30155e+06	NA	NA	2.25419e+07
GNVTQHVQGHR-HexNAc(6)Hex(7)Fuc(1)NeuAc(1)	Q15043	1.09476e+07	NA	NA	1.5859e+07	NA	NA
NNSNNFDLNR-HexNAc(3)Hex(5)NeuAc(1)	O75976	4.35267e+07	3.81531e+07	2.69075e+07	4.59845e+06	4.83646e+06	3.54691e+06
EEEELAYDWSDNNSNISAK-HexNAc(6)Hex(6)NeuAc(2)	Q9UPN3	NA	NA	3.26533e+06	NA	NA	1.56591e+07
NVTWK-HexNAc(6)Hex(6)Fuc(1)	P50454	NA	NA	12354093	NA	NA	9.33197e+06
VASVININPNTTHSTGSCR-HexNAc(6)Hex(6)NeuAc(2)	P13473	126939104	NA	NA	4.80549e+07	NA	NA
EEDAGEWITVNQTTTANRYLKVSDLQQGK-HexNAc(8)Hex(9)Fuc(1)NeuAc(4)	P54296	NA	NA	2.3903e+06	NA	NA	1.03851e+07
YHYNGTLLDGTLFDSSYSR-HexNAc(2)Hex(9)	O95302	3.06622e+07	4.92282e+07	2.47941e+07	2.50356e+07	4.00262e+07	2.08467e+07
VASVININPNTTHSTGSCR-HexNAc(5)Hex(6)Fuc(1)NeuAc(2)	P13473	1.09058e+07	4.69321e+07	NA	4.63726e+07	8.34257e+07	NA
TDDEVVQREEEAIQLDGLNASQIR-HexNAc(2)Hex(9)	P14625	9.56223e+06	1.44193e+07	5.39095e+06	1.96427e+07	1.71483e+07	1.54877e+06
EEEPVFTRQDSNRSEK-HexNAc(8)Hex(8)Fuc(1)	Q9Y520	NA	1.13551e+07	NA	NA	2075276	NA
GTNYTVR-HexNAc(2)Hex(9)	P07942	9.49617e+07	1.09131e+08	6.04809e+07	8.9992e+07	1.12068e+08	5.36434e+07
NESCSENYTTDFIYQLYSEEGK-HexNAc(2)Hex(8)	Q01813	NA	1.50345e+06	NA	NA	4.09229e+07	NA
YSSNHTEHSQNLR-HexNAc(2)Hex(9)	Q9Y2E5	597077	NA	NA	778463	NA	NA
AANGSLR-HexNAc(4)Hex(5)Fuc(1)NeuAc(1)0	P11279	2.05589e+06	NA	NA	2.36404e+06	NA	NA
NMSR-HexNAc(2)Hex(8)	Q8N841	1.04795e+07	NA	NA	7.5015e+06	NA	NA
ELDEEDNSSSSEEDRESTAQK-HexNAc(9)Hex(6)	Q8N3X1	NA	1.79466e+06	NA	NA	4.71332e+06	NA
NYTADYDK-HexNAc(2)Hex(9)	O75477	2.29614e+08	2.75539e+08	1.68942e+08	1.94535e+08	2.62275e+08	1.28009e+08
NQTNLER-HexNAc(4)Hex(5)Fuc(1)NeuAc(2)	Q8NBJ4	7.72721e+08	NA	NA	5.23033e+07	NA	NA
PGNLSR-HexNAc(3)Hex(5)NeuAc(1)	Q9BU23	NA	NA	2.7809e+06	NA	NA	2.53919e+07
NMSR-HexNAc(2)Hex(9)	Q8N841	1.41785e+07	NA	NA	1.04279e+07	NA	NA
GQAQNYSTLLLEEASAR-HexNAc(2)Hex(8)	Q9NTN9	NA	NA	1224451	NA	NA	752541
EPQPSPTDQPSFSNLTAFPGGAK-HexNAc(2)Hex(9)	Q99941	NA	NA	1.16594e+06	NA	NA	3.99392e+06
MLSLPNDSYMFR-HexNAc(2)Hex(9)	O95180	9.93094e+06	NA	NA	8.68067e+06	NA	NA
NLTIR-HexNAc(6)Hex(7)NeuAc(4)	P15924	NA	NA	1.22984e+06	NA	NA	1.0034e+08
EEEELAYDWSDNNSNISAKR-HexNAc(5)Hex(3)	Q9UPN3	NA	2.20543e+06	NA	NA	2.44377e+07	NA
CHEGNGTFECGACR-HexNAc(2)Hex(8)	P05556	5.05707e+06	NA	NA	8.09323e+06	NA	NA
TTNSSAADPR-HexNAc(2)Hex(10)	Q9UHN6	6.0036e+06	NA	NA	3.47737e+06	NA	NA
NK-HexNAc(2)Hex(5)	Q4KMQ2	NA	NA	28748.6	NA	NA	697325
KIPAINQTITEANEK-HexNAc(2)Hex(7)	P11047	3.29389e+07	3.79229e+07	8.10509e+06	5.20638e+06	6.61579e+06	2.49368e+06
ETHFDTQNNISTMSAEWVSKANAK-HexNAc(2)Hex(7)	Q9H2U1	2.01314e+07	NA	NA	9.64597e+06	NA	NA
KGTNFTHLVADR-HexNAc(2)Hex(9)	Q9C0C4	1.54037e+07	1.28924e+07	6.45152e+06	1.02085e+07	1.03201e+07	4.79271e+06
LANNTHQHVFDDLR-HexNAc(2)Hex(9)	Q99523	NA	5.88074e+06	1.66311e+06	NA	2.47068e+06	964896
VASVININPNTTHSTGSCR-HexNAc(5)Hex(6)Fuc(1)NeuAc(1)	P13473	1.88433e+07	5.26897e+07	1.17023e+07	38371758	1.90746e+07	2.78447e+07
EENK-HexNAc(5)Hex(5)NeuAc(2)	Q5SSJ5	NA	NA	3.58436e+06	NA	NA	359708
ENK-HexNAc(2)Hex(1)Fuc(1)	A0MZ66	NA	NA	1.64695e+06	NA	NA	2.66613e+06
VASVININPNTTHSTGSCR-HexNAc(6)Hex(7)Fuc(1)NeuAc(2)	P13473	NA	6.23574e+07	NA	NA	2.10496e+08	NA
LKCQENTSK-HexNAc(2)Hex(9)	Q96KX1	NA	346321	5.30968e+06	NA	5.12534e+06	4.27739e+07
KDFLARNMTK-HexNAc(2)Hex(8)	Q6ZT98	69486.1	NA	NA	1.75527e+07	NA	NA
LLNINPNK-HexNAc(6)Hex(7)Fuc(1)NeuAc(1)0	P11279	2.48986e+08	NA	NA	1.37261e+08	NA	NA
VQPFNVTQGK-HexNAc(5)Hex(6)NeuAc(1)0	P13473	2.15422e+08	NA	NA	1.34242e+08	NA	NA
LENITTGTYTIHAQK-HexNAc(2)Hex(8)	Q15155	1.29302e+08	NA	6.41513e+07	1.12506e+08	NA	4.34616e+07
DLGPTLANSTHHNVR-HexNAc(2)Hex(10)	P04062	9.80666e+07	NA	NA	4.52093e+07	NA	NA
LLSTEGSQNITYHCK-HexNAc(2)Hex(8)	P02458	8.1221e+07	6.70159e+07	5.65492e+07	5.32573e+07	4.87099e+07	2.67392e+07
DNHTHSDIQVK-HexNAc(2)Hex(9)	Q8IV08	1.05434e+07	1.02771e+07	NA	7.53154e+06	6.78014e+06	NA
ENK-HexNAc(3)Hex(4)NeuAc(1)0	A0MZ66	1.1376e+06	NA	NA	2.80942e+07	NA	NA
PNQTSK-HexNAc(4)Hex(5)Fuc(1)NeuAc(1)	P15586	3.91603e+07	8.77255e+07	NA	6.0226e+07	2.53409e+08	NA
SANSTLAQALHWTR-HexNAc(2)Hex(8)	Q9BU23	6.77243e+07	NA	NA	9.40679e+07	NA	NA
LRNPCTSEQNCTSPFSYK-HexNAc(2)Hex(8)	P05556	9.49014e+06	NA	8.07298e+06	1.21586e+07	NA	7.07412e+06
EDPSPENR-HexNAc(7)Hex(8)Fuc(1)NeuAc(3)	Q01826	NA	11449324	NA	NA	6.783e+06	NA
KEDALNETR-HexNAc(2)Hex(8)	P10909	1.64214e+07	1.82782e+07	NA	7.46325e+06	7.12589e+06	NA
NHTL-HexNAc(7)Hex(6)	Q8NBJ4	NA	2.29508e+07	NA	NA	8.16999e+06	NA
QVKNIVHNYSEAEIK-HexNAc(2)Hex(9)	Q9H201	2.86597e+07	NA	NA	2.35582e+06	NA	NA
VQQVGHYPPANSSLSSR-HexNAc(2)Hex(9)	Q24JP5	NA	NA	5.67477e+06	NA	NA	1.63958e+07
EENK-HexNAc(2)Hex(5)Fuc(1)	Q5SSJ5	NA	NA	477764	NA	NA	1.98285e+07
KQPSPTPGNATGGPLPVSAASQAHQASHQPLYLNHP-HexNAc(2)Hex(9)	Q99941	NA	1.77308e+07	NA	NA	3.83724e+07	NA
EEEELAYDWSDNNSNISAKR-HexNAc(7)Hex(3)	Q9UPN3	NA	764231	NA	NA	9.69838e+06	NA
KNASNMEYR-HexNAc(2)Hex(7)	Q9Y639	NA	9.62005e+07	3.33044e+07	NA	8.91371e+06	4.53714e+06
RAEDYGPVEVISHWHPNITINIVDDHTPWVK-HexNAc(2)Hex(8)	O96005	NA	NA	4.55522e+06	NA	NA	2.33268e+06
VNSTELFHVDR-HexNAc(2)Hex(9)	Q7Z7M0	1.94324e+07	NA	NA	8.21885e+06	NA	NA
APSNTSTLMK-HexNAc(2)Hex(8)	Q9N2K0	NA	3.17216e+06	NA	NA	3.74813e+08	NA
ENKTLK-HexNAc(3)Hex(5)NeuAc(1)	A0MZ66	NA	1.43039e+07	NA	NA	1.68076e+07	NA
QQQHLFGSNVTDCSGNFCLFR-HexNAc(2)Hex(1)	P02787	NA	1.71787e+07	NA	NA	4.0197e+06	NA
QPVSPVIHPPVSYNDTAPR-HexNAc(2)Hex(9)	Q15904	1.56492e+07	1.96696e+07	8291783	1.39069e+07	17473804	7.41084e+06
GPVYLLFSVNGSGHFCGVAEMK-HexNAc(6)Hex(5)Fuc(1)	Q9Y5A9	NA	136118780	NA	NA	6.09824e+06	NA
TCHESYNR-HexNAc(2)Hex(8)	P33908	1.14377e+07	1.15998e+07	NA	4.74513e+06	5.14671e+06	NA
NVTWK-HexNAc(2)Hex(9)	P50454	2.32056e+08	2.48689e+08	1.35205e+08	2.84522e+08	3.03581e+08	158526120
FTFTSHTPGEHQICLHSNSTK-HexNAc(2)Hex(8)	Q9BVK6	6.11857e+07	3.62844e+07	25176460	7.24562e+07	2.61582e+07	3.29294e+07
SEDIKNVSR-HexNAc(2)Hex(9)	P78536	7.07642e+07	NA	NA	1.08493e+07	NA	NA
NK-HexNAc(5)Hex(4)Fuc(1)NeuAc(1)	Q4KMQ2	NA	NA	78221.6	NA	NA	1.06388e+06
PSPSDPGSGTATMMNSSSRGSSPTRVLDEGK-HexNAc(2)Hex(8)	Q5JRA6	NA	1.00085e+07	NA	NA	1.94159e+07	NA
DNHTHSDIQVK-HexNAc(3)Hex(4)Fuc(1)	Q8IV08	1.95092e+07	2.22816e+07	NA	1.51606e+08	2.00337e+08	NA
NK-HexNAc(5)Hex(8)Fuc(1)	Q4KMQ2	NA	NA	762204	NA	NA	1.14073e+07
KNSTAYFR-HexNAc(2)Hex(8)	Q8NBL1	2.2705e+07	2.75495e+07	NA	2.95503e+07	3.11784e+07	NA
GIASNK-HexNAc(2)Hex(10)	P11150	1.59823e+06	NA	NA	1.99686e+06	NA	NA
PVTDGQPHSINITR-HexNAc(2)Hex(9)	P78357	2.30664e+07	NA	NA	7.1292e+07	NA	NA
VQPFNVTQGK-HexNAc(2)Hex(8)	P13473	NA	NA	1265202	NA	NA	4.17913e+06
NHTL-HexNAc(5)Hex(6)Fuc(1)NeuAc(3)	Q8NBJ4	NA	1.96207e+07	NA	NA	1.92813e+07	NA
GNNGPPKSGRNFSGPR-HexNAc(2)Hex(10)	Q9Y520	2.49705e+06	NA	NA	9.80666e+07	NA	NA
HAILVGNHSSR-HexNAc(2)Hex(8)	Q6UWL2	7.79357e+06	NA	5.08661e+06	2.04177e+06	NA	4.94049e+06
ENK-HexNAc(4)Hex(3)	A0MZ66	NA	2.04698e+06	NA	NA	1.09221e+06	NA
EEEELAYDWSDNNSNISAKR-HexNAc(3)Hex(4)NeuAc(1)	Q9UPN3	NA	4.57684e+07	NA	NA	8.26466e+07	NA
NHSIFLADINQER-HexNAc(2)Hex(10)	P50897	2.16516e+07	NA	NA	5.16573e+06	NA	NA
EEDNR-HexNAc(7)Hex(6)Fuc(1)NeuAc(4)	Q6V702	NA	3.33176e+06	NA	NA	8.54501e+07	NA
AMNASANITSDGVEVLGK-HexNAc(8)Hex(9)	Q05707	6.79848e+06	NA	NA	5.1482e+06	NA	NA
QQQHLFGSNVTDCSGNFCLFR-HexNAc(2)Hex(9)	P02787	NA	NA	5725653	NA	NA	6.77629e+06
VPSENKDLYEYSWVQGPLHSNETDR-HexNAc(2)Hex(8)	Q92542	1.56494e+07	1.15635e+07	NA	9.57509e+06	1.09342e+07	NA
TILVDNNTWNNTHISR-HexNAc(2)Hex(7)	P46977	4.10257e+07	NA	1.59136e+07	26348502	NA	1.20136e+07
AENQTAPGEVPALSNLRPPSR-HexNAc(2)Hex(1)	P28300	NA	6.46265e+07	1.69572e+07	NA	2.23542e+07	9.19233e+06
IAPASNVSHTVVLRPLK-HexNAc(6)Hex(3)	P43308	1.18922e+08	2.60071e+08	1.91978e+08	1.02979e+08	1.79369e+08	174229358
GNVTQHVQGHR-HexNAc(6)Hex(7)Fuc(1)NeuAc(2)	Q15043	4.87861e+07	4.639e+07	3.05286e+07	9.08499e+07	7.963e+07	5.72825e+07
QQQHLFGSNVTDCSGNFCLFRSETK-HexNAc(7)Hex(8)	P02787	NA	NA	1.13748e+06	NA	NA	1.88614e+07
LNLTTDPK-HexNAc(4)Hex(5)NeuAc(2)	Q92896	1.83318e+07	1.33635e+08	6.30117e+07	4.02684e+07	9.43733e+06	9.04371e+06
AQAVETNK-HexNAc(2)Hex(10)	P11150	4.42254e+06	NA	NA	1.78154e+06	NA	NA
VGGNR-HexNAc(6)Hex(4)NeuAc(1)	Q8NEM8	NA	NA	5.89856e+06	NA	NA	3.0598e+06
YHSQTYGNGSK-HexNAc(2)Hex(6)	Q13438	12178595	1.23414e+07	5.45246e+06	1.43158e+07	1.45002e+07	7.74616e+06
AQAVETNK-HexNAc(2)Hex(7)	P11150	2.59889e+06	3.30429e+06	NA	6.64328e+06	7.29587e+06	NA
EEEENLTR-HexNAc(8)Hex(5)Fuc(1)	P56277	NA	NA	2.20937e+06	NA	NA	2.22121e+06
NLTLR-HexNAc(6)Hex(7)Fuc(1)NeuAc(2)	P05362	NA	1.5638e+08	NA	NA	2.0213e+08	NA
EEEENLTR-HexNAc(3)Hex(6)Fuc(1)NeuAc(1)	P56277	NA	NA	4923693	NA	NA	503006
NLAMGVNLTSMSK-HexNAc(2)Hex(6)	P12004	NA	194656918	NA	NA	194656918	NA
VTNSNANAASPLIVAGYNVSGSVR-HexNAc(2)Hex(8)	Q15155	1.34562e+07	NA	NA	2.41978e+07	NA	NA
EEDNR-HexNAc(6)Hex(3)Fuc(1)	Q6V702	NA	3.16622e+06	NA	NA	4258791	NA
NESDLIEK-HexNAc(7)Hex(3)Fuc(1)	Q8NF91	NA	NA	2.54364e+06	NA	NA	2.40969e+06
FTFTSHTPGEHQICLHSNSTK-HexNAc(6)Hex(3)	Q9BVK6	NA	7.96715e+07	NA	NA	6.17518e+07	NA
ENKTLK-HexNAc(5)Hex(4)Fuc(1)NeuAc(2)	A0MZ66	NA	3.59223e+06	NA	NA	3.64568e+06	NA
NMSFVNDLTVTQDGR-HexNAc(2)Hex(8)	Q9HDC9	1.75308e+07	NA	NA	1.17212e+07	NA	NA
NYTADYDK-HexNAc(8)Hex(9)Fuc(1)NeuAc(4)	O75477	2.83691e+08	NA	1.96885e+08	1.53e+08	NA	1.11365e+08
VASVININPNTTHSTGSCR-HexNAc(8)Hex(5)	P13473	NA	NA	949757	NA	NA	1.17023e+07
FTFTSHTPGEHQICLHSNSTKFSLFAGGMLR-HexNAc(7)Hex(4)Fuc(1)	Q9BVK6	9.5887e+06	NA	NA	1.51967e+06	NA	NA
EEDNR-HexNAc(6)Hex(5)Fuc(1)NeuAc(2)	Q6V702	NA	508316	NA	NA	1.94099e+06	NA
HLYTTTGGETDFTNVTSLR-HexNAc(2)Hex(9)	Q99523	2.74491e+07	NA	1.3056e+07	8.47231e+06	NA	7.06877e+06
VIVTSKHNNDTQHIWESDSNEFSVIADPR-HexNAc(7)Hex(4)Fuc(1)	P14625	NA	3.59807e+06	NA	NA	1.20292e+06	NA
EQEAAMEIQEPAANK-HexNAc(8)Hex(9)Fuc(1)NeuAc(4)	Q92576	NA	3.8381e+07	NA	NA	1.04921e+08	NA
ANDTSYIR-HexNAc(2)Hex(8)	P20774	356494	251156	289283	1.56001e+08	2.5606e+08	1.10674e+08
NHTL-HexNAc(4)Hex(5)Fuc(1)NeuAc(2)	Q8NBJ4	NA	8.12302e+07	NA	NA	5.19445e+07	NA
YHTESLQNMSK-HexNAc(2)Hex(8)	O94992	4.13353e+06	NA	1.13461e+06	1.57876e+08	NA	7.07578e+07
KWGHNITEFQQR-HexNAc(2)Hex(6)	Q96HE7	1.15793e+07	5.41308e+06	5.92958e+06	4077331	3.82507e+06	3.95333e+06
DNTTVTR-HexNAc(2)Hex(9)	P11279	NA	1.01801e+07	NA	NA	1.00814e+07	NA
LNSSTIK-HexNAc(6)Hex(7)NeuAc(2)	P13473	2.07495e+08	5.82983e+06	1.21594e+08	2.3823e+08	5.37742e+07	1.47503e+08
ENK-HexNAc(5)Hex(3)	A0MZ66	NA	NA	3.20164e+06	NA	NA	324049
AAAAAAGAGPEMVRGQVFDVGPRYTNLSYIGEGAYGMVCSAYDNVNK-HexNAc(3)Hex(6)NeuAc(1)	P28482	NA	NA	1.71738e+06	NA	NA	2.06034e+06
ENK-HexNAc(7)Hex(8)Fuc(1)NeuAc(3)	A0MZ66	1.12337e+06	NA	NA	1.00339e+06	NA	NA
NPCTSEQNCTSPFSYK-HexNAc(2)Hex(9)	P05556	NA	NA	8.17156e+06	NA	NA	1.1468e+06
ETIQPFMNK-HexNAc(2)Hex(7)	Q9Y227	1.94835e+07	NA	NA	3.03133e+08	NA	NA
NK-HexNAc(5)Hex(6)NeuAc(1)	Q4KMQ2	NA	NA	5.55862e+06	NA	NA	5.55862e+06
TPEFHPNK-HexNAc(2)Hex(7)	Q96S16	2.28841e+06	NA	NA	1332020	NA	NA
YHYNGTFLDGTLFDSSHNR-HexNAc(2)Hex(8)	O95302	109017494	1.18343e+08	3.25836e+07	8.48858e+07	9.50691e+07	3.14703e+07
VVGSFDEVPPTSDENVTVTETK-HexNAc(2)Hex(8)	P22760	35919115	9.14762e+07	2.23927e+07	2.89724e+07	87102079	2.20147e+07
ENK-HexNAc(3)Hex(5)NeuAc(1)	A0MZ66	NA	NA	2.67366e+07	NA	NA	3.56035e+07
SENASLVLSSSNQK-HexNAc(2)Hex(8)	P56199	3.34529e+07	3.8012e+07	2.11177e+07	2.37464e+07	2.36312e+07	9.28266e+06
EEESSGNISK-HexNAc(8)Hex(5)	Q7Z6E9	4.28655e+06	NA	NA	16602855	NA	NA
KKENGMPMDIVNTSGR-HexNAc(6)Hex(3)	Q9Y639	NA	NA	1.15493e+07	NA	NA	1.75618e+07
AANGSLRALQATVGNSYK-HexNAc(5)Hex(3)	P11279	NA	3356494	NA	NA	3356494	NA
EEEELAYDWSDNNSNISAKRNYFSELTMELEEK-HexNAc(3)Hex(4)Fuc(1)NeuAc(1)	Q9UPN3	NA	NA	68473114	NA	NA	39935246
AMNASANITSDGVEVLGK-HexNAc(5)Hex(6)NeuAc(2)	Q05707	6.45841e+06	NA	NA	5.15957e+06	NA	NA
LSDTTSQSNSTAK-HexNAc(2)Hex(5)	P07942	3.96095e+07	1.49152e+07	NA	7.80685e+06	9.09652e+06	NA
TILVDNNTWNNTHISR-HexNAc(6)Hex(4)	P46977	1.01559e+08	NA	NA	117262517	NA	NA
KNASNMEYR-HexNAc(2)Hex(8)	Q9Y639	3.82467e+07	5.49637e+07	2.08174e+07	2.06109e+07	2.25776e+07	1.12155e+07
ENK-HexNAc(6)Hex(3)Fuc(1)NeuAc(2)	A0MZ66	7.91298e+06	NA	NA	1.19019e+06	NA	NA
EEDNR-HexNAc(6)Hex(6)Fuc(1)NeuAc(3)	Q6V702	NA	346851	NA	NA	3.69861e+06	NA
VNFTEIQK-HexNAc(4)Hex(5)Fuc(1)NeuAc(2)	P02771	NA	1.48185e+07	NA	NA	2.18986e+06	NA
YPHKPEINSTTHPGADLQENFCR-HexNAc(2)Hex(9)	P00734	2.51339e+07	1.18703e+07	7.27016e+06	1.08081e+07	688720	4.0901e+06
NWTITR-HexNAc(2)Hex(9)	P19022	3.74511e+07	4.90659e+07	NA	4.25424e+07	6.20096e+07	NA
HIWSLEISNKPNVSEPEEPK-HexNAc(5)Hex(6)Fuc(1)NeuAc(3)	O75976	14827313	1.36169e+07	1.04073e+07	3.72066e+07	3.90131e+07	1.36632e+07
EEEENLTRK-HexNAc(2)Hex(7)	P56277	NA	NA	1919969	NA	NA	2.02501e+06
AMSSNETAAYK-HexNAc(2)Hex(7)	Q8TCJ2	1.20712e+07	16361759	NA	5.39336e+06	8.09843e+06	NA
YFNYTVK-HexNAc(2)Hex(9)	O00469	9.61647e+06	2919735	NA	8.28456e+06	6.93615e+06	NA
LGVIEDHSNR-HexNAc(2)Hex(9)	P14625	NA	1.88512e+07	NA	NA	8396077	NA
KESNSSSNQLDK-HexNAc(2)Hex(9)	A2AJT9	NA	NA	1.3774e+06	NA	NA	7.80712e+06
NESVR-HexNAc(2)Hex(8)	Q92542	5.57122e+06	NA	NA	2.44248e+07	NA	NA
AASMNHTK-HexNAc(2)Hex(7)	Q9UBV2	2.36059e+06	NA	NA	4.58695e+06	NA	NA
IQNILSEKPTVTTVYANNGSVLQGSSVASVYDGK-HexNAc(2)Hex(7)	Q15165	1.90294e+07	1.60464e+07	7.13848e+06	1.3842e+07	1.29955e+07	5.02703e+06
KLNYTLSQGHR-HexNAc(5)Hex(6)NeuAc(1)	P15144	4.10615e+07	1.64438e+07	7.16122e+06	1.52726e+07	1.74962e+07	7.32336e+06
AQAVETNK-HexNAc(2)Hex(8)	P11150	NA	4.14194e+06	NA	NA	1.69517e+06	NA
EEEELAYDWSDNNSNISAK-HexNAc(4)Hex(4)Fuc(1)	Q9UPN3	NA	NA	2.98204e+07	NA	NA	7.55113e+07
AAAAAAGAGPEMVRGQVFDVGPRYTNLSYIGEGAYGMVCSAYDNVNK-HexNAc(4)Hex(3)	P28482	NA	NA	6.7093e+06	NA	NA	2.82982e+07
NNQTECFNHVR-HexNAc(2)Hex(9)	Q9NTN9	3.69957e+06	NA	NA	6.03246e+06	NA	NA
NVTWK-HexNAc(7)Hex(8)Fuc(1)NeuAc(4)	P50454	7.57579e+06	1.03826e+07	NA	3.13076e+06	1.03826e+07	NA
LIDNNKTEK-HexNAc(2)Hex(9)	P07602	2.70741e+07	3.0214e+07	NA	1.83064e+07	1.69603e+07	NA
EEEQSPEDALLRGLQRTATDFYAELQNSTDLGYANGNLVHGSNQK-HexNAc(3)Hex(4)Fuc(1)NeuAc(1)	Q9UBS9	NA	1.16185e+07	NA	NA	1.47231e+07	NA
ENK-HexNAc(7)Hex(8)NeuAc(1)	A0MZ66	1.37502e+06	NA	NA	2.53381e+06	NA	NA
EEEPVFTRQDSNR-HexNAc(5)Hex(6)Fuc(1)NeuAc(1)	Q9Y520	1.00136e+07	NA	NA	8.26932e+06	NA	NA
EEEPVFTRQDSNRSEK-HexNAc(5)Hex(8)	Q9Y520	5.65094e+06	4188634	NA	1.97855e+07	1.57695e+07	NA
GISYYIGAQSNFTK-HexNAc(2)Hex(9)	Q9UN76	2.44213e+07	4.12709e+07	NA	4.9497e+07	7.09817e+07	NA
AMFVMNCSINK-HexNAc(2)Hex(7)	Q56P03	NA	NA	1.01088e+06	NA	NA	8.28822e+06
ESNSSSNQLDK-HexNAc(2)Hex(9)	A2AJT9	NA	NA	3.12885e+06	NA	NA	4.03391e+07
GINESYKK-HexNAc(3)Hex(4)Fuc(1)	P50897	NA	NA	3.18571e+06	NA	NA	1.03238e+06
YHYNCSLLDGTQLFTSHDYGAPQEATLGANK-HexNAc(2)Hex(9)	Q96AY3	1.15824e+07	1.33515e+07	8.18746e+06	1.4419e+07	1.18811e+07	7.6633e+06
GNETIVNLIHSTR-HexNAc(2)Hex(9)	P16870	NA	NA	8.37303e+06	NA	NA	4.59773e+06
GNGSRPSSPEEVK-HexNAc(9)Hex(6)Fuc(1)	Q05707	NA	1.67506e+07	NA	NA	368363	NA
NATLVNEADK-HexNAc(9)Hex(1)Fuc(1)	P15144	NA	NA	1.05495e+07	NA	NA	2.21412e+07
EENK-HexNAc(4)Hex(5)Fuc(1)	Q5SSJ5	NA	8.00212e+06	5.96011e+06	NA	3.8802e+07	1.31138e+06
NNSK-HexNAc(7)Hex(7)Fuc(1)NeuAc(3)	O14647	NA	NA	763184	NA	NA	4.49185e+06
YIHQNYTK-HexNAc(2)Hex(1)	Q02809	NA	2.68535e+07	8.06645e+06	NA	41901187	1.00593e+07
VNQNLVYESGSLNFSK-HexNAc(2)Hex(9)	P04114	9.54639e+06	1.29919e+07	NA	1.47625e+07	9.11308e+06	NA
KKEDALNETR-HexNAc(2)Hex(9)	P10909	223339185	4.2001e+07	7.07534e+07	9.61743e+07	2.07352e+07	3.5928e+07
NESVR-HexNAc(9)Hex(9)Fuc(1)	Q92542	8.82117e+06	NA	NA	7.6045e+06	NA	NA
ESPWNGSVGEK-HexNAc(2)Hex(8)	Q15751	5.2952e+07	NA	2.78093e+07	744643	NA	8.66366e+06
RVNDNK-HexNAc(2)Hex(6)	P11047	7.05519e+06	2.02664e+06	NA	2.69652e+06	1.49004e+06	NA
NVTWK-HexNAc(8)Hex(9)	P50454	1.09276e+07	NA	NA	5.36233e+07	NA	NA
LKVPESENNK-HexNAc(2)Hex(7)	Q5JRA6	1.72131e+07	1.86608e+07	7.40764e+06	1.05672e+07	9.75139e+06	3.53864e+06
VHNFSK-HexNAc(2)Hex(8)	Q92545	NA	1.21714e+06	NA	NA	995948	NA
NHTK-HexNAc(6)Hex(6)Fuc(1)	Q7Z7M0	4.56095e+06	NA	NA	4.84077e+06	NA	NA
NVTHHVSVTK-HexNAc(2)Hex(9)	O94901	2.08227e+07	2.08522e+07	NA	2.48995e+07	2.59971e+07	NA
GNGSRPSSPEEVK-HexNAc(2)Hex(7)	Q05707	1.13159e+08	1.22507e+08	6.04421e+07	7.65825e+07	8.70032e+07	3.46198e+07
GNVTQHVQGHR-HexNAc(2)Hex(9)	Q15043	2.00916e+06	3.44443e+07	1.13214e+07	3.1957e+06	4.82296e+07	1.56697e+07
AAAAAAATAVDEESPFLVAVENGSAPSEPGLVCEPPQPEEEELR-HexNAc(4)Hex(6)NeuAc(1)	Q5TGJ6	NA	NA	6133865	NA	NA	5.88539e+07
NVTHHVSVTK-HexNAc(2)Hex(8)	O94901	NA	6.06921e+07	1.55944e+07	NA	7.50748e+07	2.22882e+07
NNVNESWK-HexNAc(2)Hex(8)	Q9NUC0	NA	NA	2.09092e+06	NA	NA	4.58816e+06
EENK-HexNAc(3)Hex(6)NeuAc(1)	Q5SSJ5	NA	NA	3.94702e+06	NA	NA	1.68061e+07
LQNQTEPR-HexNAc(2)Hex(7)	Q8N413	NA	2.33576e+06	NA	NA	392419	NA
EEDNR-HexNAc(6)Hex(4)Fuc(1)	Q6V702	NA	989167	NA	NA	3.61966e+06	NA
YYNYTLSINGK-HexNAc(2)Hex(6)	P15586	NA	2.46354e+07	50897.8	NA	1.85593e+07	4.34518e+06
ILNGSNK-HexNAc(2)Hex(9)	Q9UBV2	5.21221e+07	NA	1.90455e+07	5.86726e+07	NA	2.1728e+07
YFNYTVK-HexNAc(2)Hex(8)	O00469	NA	NA	3.61224e+06	NA	NA	3.82397e+06
NHTYNTYIGQGYIIPGMDQGLQGACMGER-HexNAc(2)Hex(8)	Q96AY3	NA	2.2296e+07	NA	NA	3.57684e+06	NA
HPSCVNVSK-HexNAc(4)Hex(5)Fuc(1)NeuAc(1)	Q9UHN6	2.68826e+07	2.77533e+07	NA	2.72634e+07	2.7938e+07	NA
YIHQNYTK-HexNAc(2)Hex(8)	Q02809	1.60562e+07	332838101	1.51611e+07	1.60562e+07	3.93989e+08	1.66552e+07
NASEMIDK-HexNAc(2)Hex(7)	P36542	3.65399e+07	NA	NA	8.27228e+07	NA	NA
FPPIRANHSLDVSFYFR-HexNAc(2)Hex(8)	P78357	3.14542e+06	NA	NA	3.64301e+06	NA	NA
DQPGHPVNR-HexNAc(2)Hex(9)	Q16880	2.26461e+07	2.48829e+07	NA	1.16947e+07	1.39766e+07	NA
NNSNNFDLNR-HexNAc(4)Hex(5)NeuAc(1)	O75976	37582622	4.66561e+07	NA	4.42486e+06	4.52631e+06	NA
KLGDCISEDSYPDGNITWYR-HexNAc(2)Hex(9)	Q13740	NA	2.94692e+06	NA	NA	58451094	NA
KIPAINQTITEANEK-HexNAc(2)Hex(8)	P11047	1.95573e+08	1.53956e+08	7.92213e+07	9.25733e+07	9.33226e+07	5.57588e+07
HNNDTQHIWESDSNEFSVIADPR-HexNAc(2)Hex(5)	P14625	2.14028e+08	2.38009e+08	1.12023e+08	3.0883e+07	1.45326e+08	5.03596e+07
NNVNESWK-HexNAc(2)Hex(7)	Q9NUC0	NA	NA	332776	NA	NA	2.42087e+07
YRPENSVANDTGFTVVAPGK-HexNAc(2)Hex(1)	O60911	NA	1.00558e+07	NA	NA	2632234	NA
VQPFNVTQGK-HexNAc(5)Hex(6)Fuc(1)NeuAc(1)	P13473	1.6867e+08	1.63641e+08	7.10584e+07	1.53589e+08	1.70857e+08	7.42253e+07
APAQSSVTFEDVAVNFSLEEWSLLNEAQRCLYR-HexNAc(3)Hex(3)Fuc(1)	Q9NXT0	NA	3.07944e+07	NA	NA	3.66082e+06	NA
AENQTAPGEVPALSNLRPPSR-HexNAc(2)Hex(8)	P28300	8.72336e+07	7.54732e+07	2.29995e+07	8.5248e+07	5.53727e+07	1.69922e+07
NISDGFDGIPDNVDAALALPAHSYSGR-HexNAc(6)Hex(3)	P04004	NA	NA	3905905	NA	NA	3.31086e+06
EDPSPENR-HexNAc(2)Hex(9)	Q01826	3.16115e+07	NA	NA	3.81832e+06	NA	NA
AAGAAVLLVEMLERAAFFGVTANLVLYLNSTNFNWTGEQATR-HexNAc(7)Hex(7)Fuc(1)NeuAc(2)	Q8IY34	NA	NA	4.982e+06	NA	NA	5.75077e+06
YEQLQNETR-HexNAc(2)Hex(7)	P11117	1.62687e+07	1.70082e+07	NA	2.75173e+06	1.14749e+07	NA
GINESYK-HexNAc(9)Hex(3)	P50897	NA	3.29091e+06	NA	NA	4.13526e+06	NA
ALHALNVTWR-HexNAc(2)Hex(8)	Q9Y2E5	2.63492e+06	NA	NA	6.6903e+07	NA	NA
SQNDTVTPDVWYTSKPK-HexNAc(2)Hex(1)	Q9BTY2	NA	5.21612e+07	2.47011e+07	NA	3.21144e+07	19294121
NHSSYLGYSVAAISTGESTHFVAGAPR-HexNAc(2)Hex(9)	P17301	6.56022e+06	NA	NA	2.40869e+06	NA	NA
NVSR-HexNAc(6)Hex(7)Fuc(1)NeuAc(3)	P78536	NA	1.52024e+07	NA	NA	7.01549e+06	NA
WGHNITEFQQR-HexNAc(2)Hex(9)	Q96HE7	9.09301e+07	1.64816e+08	6.15199e+07	8.87397e+07	1.37951e+08	6.51784e+07
HLLENSTASVSEAER-HexNAc(2)Hex(9)	P42892	NA	2.2871e+07	NA	NA	8.13278e+06	NA
EENK-HexNAc(3)Hex(4)Fuc(1)NeuAc(1)	Q5SSJ5	NA	NA	1.16165e+07	NA	NA	1.12775e+06
NITLR-HexNAc(5)Hex(6)Fuc(1)NeuAc(2)	Q9UHN6	NA	59721979	NA	NA	5.59257e+07	NA
DNHTHSDIQVK-HexNAc(2)Hex(10)	Q8IV08	9.15364e+06	NA	NA	2.7188e+06	NA	NA
ANTTQPGIVEGGQVLK-HexNAc(2)Hex(6)	P06756	3.41636e+06	NA	NA	4.42358e+06	NA	NA
EENKSSEETK-HexNAc(2)Hex(4)	Q5SSJ5	NA	NA	1.08959e+06	NA	NA	354189
YHYNGTLLDGTSFDTSYSK-HexNAc(2)Hex(9)	Q96AY3	8.02957e+07	7.66056e+07	4.87412e+07	4.91769e+07	4.17063e+07	2.88883e+07
TVLENSTSYEEAK-HexNAc(2)Hex(9)	Q13510	1.48101e+07	2.75188e+07	15701954	1.90788e+07	2.90504e+07	8933545
ENK-HexNAc(7)Hex(4)	A0MZ66	2.22105e+06	NA	NA	5.87325e+06	NA	NA
HLYTTTGGETDFTNVTSLR-HexNAc(2)Hex(1)	Q99523	NA	24623549	9.82833e+06	NA	1.62893e+07	7.79477e+06
NASEMIDK-HexNAc(2)Hex(8)	P36542	18729811	NA	2.09032e+06	1230721362	NA	525717400
QGVVLGQNLSKYFSDGSSNTFPVWFEYPVQIEPDTFYTASVILDGNELSYFGQEGMTEVQCGK-HexNAc(2)Hex(1)	Q9Y2F9	NA	NA	4.29246e+07	NA	NA	3.53102e+07
EGGPLLYEGISLTMNSKLLNGSQR-HexNAc(3)Hex(6)Fuc(1)	Q32P28	NA	NA	4.4571e+06	NA	NA	3.53179e+06
EEEPVFTRQDSNRSEK-HexNAc(6)Hex(3)Fuc(1)NeuAc(1)	Q9Y520	9.30205e+07	9.63292e+07	NA	8.49046e+06	1.25769e+07	NA
KFNSTQIAAMAPEHEEPR-HexNAc(2)Hex(7)	Q4G148	NA	9.04882e+07	NA	NA	2.01091e+07	NA
ALMNGSESR-HexNAc(2)Hex(10)	P35613	1.19073e+07	NA	NA	9.58816e+06	NA	NA
NR-HexNAc(3)Hex(4)	Q4KMQ2	NA	NA	2103263	NA	NA	3.2212e+06
QAVGGAGPPNPAINGSAPR-HexNAc(6)Hex(9)	P29353	NA	NA	1.49607e+06	NA	NA	1.07335e+07
NQTLR-HexNAc(2)Hex(9)	P38435	3.06756e+07	NA	NA	3.48646e+07	NA	NA
TVLTPATNHMGNVTFTIPANR-HexNAc(6)Hex(3)	P01024	NA	1.75268e+07	NA	NA	12834592	NA
NVSHDR-HexNAc(7)Hex(7)	Q86UQ4	9.48378e+06	NA	NA	1.38842e+07	NA	NA
NTSVEHTR-HexNAc(2)Hex(9)	Q96JJ7	1.45466e+06	NA	NA	1.09337e+06	NA	NA
ETHFDTQNNISTMSAEWVSKANAK-HexNAc(2)Hex(8)	Q9H2U1	9.29024e+06	NA	NA	1.28011e+07	NA	NA
DLGPTLANSTHHNVR-HexNAc(2)Hex(1)	P04062	NA	1.12382e+08	2.92064e+07	NA	4.95287e+07	1.34868e+07
NVTVK-HexNAc(4)Hex(5)Fuc(1)NeuAc(2)	O75976	5.21081e+07	5.98734e+07	2.71093e+07	3.07708e+07	3.79457e+07	1.75508e+07
EVGPRNSTNK-HexNAc(5)Hex(6)NeuAc(2)	Q6Y7W6	1.52343e+08	NA	NA	6.47076e+07	NA	NA
VVANGTGTQGQLK-HexNAc(2)Hex(1)	P08236	NA	NA	3.30308e+07	NA	NA	2.49497e+07
PFQANNVSLSNMIK-HexNAc(2)Hex(9)	Q9HCG7	NA	2.21095e+07	NA	NA	1.40394e+08	NA
NLTLR-HexNAc(5)Hex(6)Fuc(1)NeuAc(3)	P05362	NA	1.06924e+08	NA	NA	1.19892e+08	NA
NISR-HexNAc(2)Hex(8)	Q86UQ4	3.8238e+07	NA	NA	3.71981e+07	NA	NA
NVTWK-HexNAc(6)Hex(7)NeuAc(4)	P50454	NA	NA	3.61941e+06	NA	NA	8.01253e+06
GNVTQHVQGHR-HexNAc(2)Hex(10)	Q15043	1.65139e+07	NA	NA	2.27419e+07	NA	NA
AESFNFSSSGR-HexNAc(2)Hex(8)	Q3MIT2	NA	NA	8.38316e+06	NA	NA	3.6658e+06
EEQGKVYVYALNQTR-HexNAc(1)Fuc(1)	P56199	6.21141e+06	NA	NA	3.52147e+06	NA	NA
EEEPVFTRQDSNR-HexNAc(5)Hex(3)	Q9Y520	NA	5.8222e+06	NA	NA	1.79203e+06	NA
PPSCPRTIQVSDFVRYHYNGTFLDGTLFDSSHNR-HexNAc(5)Hex(7)Fuc(1)NeuAc(1)	O95302	NA	2693490	NA	NA	963249	NA
FFNFSWR-HexNAc(2)Hex(8)	P42892	5.21683e+06	NA	NA	1.35431e+07	NA	NA
NNISLVK-HexNAc(2)Hex(9)	Q9UHN6	1.51287e+08	1.64491e+08	NA	1.62152e+08	1.74874e+08	NA
EQHQKEISELNETFLSDSEK-HexNAc(2)Hex(8)	Q8IWJ2	NA	1.03257e+07	NA	NA	1.72145e+06	NA
NK-HexNAc(7)Hex(7)	Q4KMQ2	NA	NA	273822	NA	NA	704666
EEENGTNTADHVRNSSWAKNGSYQGALHNASEEATEQNIR-HexNAc(7)Hex(8)Fuc(1)NeuAc(2)	Q6GYQ0	NA	NA	8.2882e+06	NA	NA	3.45673e+06
LSDTTSQSNSTAK-HexNAc(2)Hex(8)	P07942	8.34624e+07	1.1519e+08	5.05684e+07	5.16003e+07	6.50236e+07	2.71062e+07
MNR-HexNAc(2)Hex(8)	Q92598	1.11165e+06	NA	NA	698875	NA	NA
SFMVNWTHAPGNVEK-HexNAc(2)Hex(9)	Q05707	NA	NA	1.63953e+06	NA	NA	1.43142e+06
KDNTTVTR-HexNAc(2)Hex(9)	P11279	NA	4.39303e+06	NA	NA	3.91196e+06	NA
LLNINPNK-HexNAc(6)Hex(6)NeuAc(2)	P11279	NA	444379367	NA	NA	1.07061e+08	NA
KKNSTAYFR-HexNAc(2)Hex(9)	Q8NBL1	1.05926e+07	NA	NA	1.38558e+07	NA	NA
YETTNK-HexNAc(4)Hex(5)Fuc(1)NeuAc(2)	P13473	NA	3.52074e+07	NA	NA	1.01373e+07	NA
EENK-HexNAc(4)Hex(5)NeuAc(1)	Q5SSJ5	NA	NA	6.39912e+06	NA	NA	4.46203e+06
EEDNR-HexNAc(4)Hex(6)Fuc(1)	Q6V702	NA	1.1479e+06	NA	NA	1.23408e+07	NA
YHGFLNTSYHR-HexNAc(5)Hex(6)Fuc(1)NeuAc(3)	P11117	3.40779e+07	3.70053e+07	NA	68393276	8.21613e+07	NA
ENK-HexNAc(9)Hex(6)Fuc(1)	A0MZ66	4.94653e+06	NA	NA	8.0776e+06	NA	NA
FVEGSHNSTVSLTTK-HexNAc(2)Hex(9)	P04114	1.09193e+08	8.32643e+07	56346459	9.49758e+07	8.96352e+07	4.59279e+07
EEEELAYDWSDNNSNISAK-HexNAc(9)Hex(9)Fuc(1)	Q9UPN3	NA	3161963	1.92862e+06	NA	7.65531e+06	1929869
NKQERDEDNLNYTDSFDNR-HexNAc(2)Hex(9)	A6NGE4	NA	NA	2.58413e+06	NA	NA	1.39446e+07
YNHTGQVIIYR-HexNAc(2)Hex(8)	P56199	NA	1.07807e+07	4.28829e+06	NA	1.80039e+07	7.25095e+06
VNGSSKNK-HexNAc(3)Hex(5)NeuAc(1)0	P48436	5.81344e+06	NA	NA	3.74676e+06	NA	NA
FVEGSHNSTVSLTTK-HexNAc(2)Hex(8)	P04114	2.48306e+07	2.97824e+07	1.45832e+07	1.75798e+07	1.45423e+07	9.04124e+06
TDDEVVQREEEAIQLDGLNASQIR-HexNAc(2)Hex(8)	P14625	1.17366e+07	1.7261e+07	NA	1.15296e+07	2.09351e+07	NA
EAGPEPPPPLSVYHNGTGTVR-HexNAc(2)Hex(2)	Q8WXD9	NA	NA	1.39131e+06	NA	NA	1.19777e+06
ENKTLK-The 'N	A0MZ66	NA	NA	1.54243e+07	NA	NA	5.95553e+06
EEENGTNTADHVRNSSWAK-HexNAc(5)Hex(4)Fuc(1)	Q6GYQ0	NA	NA	1.7621e+07	NA	NA	2.9883e+06
EWLPLNR-HexNAc(5)Hex(8)	O75882	NA	NA	937588	NA	NA	461608
VPLQSAHLYYNVTEK-HexNAc(2)Hex(9)	Q32P28	137839221	1.2249e+08	6.28351e+07	5.98719e+07	7.15676e+07	34417949
TILENNSGRSNSNPFNK-HexNAc(2)Hex(8)	O14647	NA	NA	2.30283e+06	NA	NA	1.93412e+07
EAPGFVTDGAGNYSVNGNCEWLIEAPSPQHRILLDFLFLDTECTYDYLFVYDGDSPR-HexNAc(7)Hex(7)	Q7Z7M0	8.08507e+07	NA	NA	6.7972e+06	NA	NA
LSGPSNSSMEDFTK-HexNAc(7)Hex(8)NeuAc(1)	Q9UJF2	NA	NA	1.96165e+06	NA	NA	2.80526e+06
LNLTTDPK-HexNAc(2)Hex(8)	Q92896	NA	1.3505e+07	NA	NA	9.16106e+06	NA
GNVTQHVQGHR-HexNAc(2)Hex(1)	Q15043	NA	1.56701e+06	4.64917e+06	NA	1.13111e+06	6.27556e+06
NVTR-HexNAc(4)Hex(5)NeuAc(1)	P05556	1.55844e+07	1.46231e+07	NA	5.29862e+06	1.99415e+07	NA
FTFTSHTPGEHQICLHSNSTK-HexNAc(2)Hex(7)	Q9BVK6	2.64118e+07	1.81635e+07	8.37091e+06	1.79879e+07	1.83587e+07	1.01456e+07
FTFTSHTPGEHQICLHSNSTK-HexNAc(3)Hex(4)Fuc(1)NeuAc(1)	Q9BVK6	3.40878e+07	NA	9.28987e+06	12655352	NA	6.9849e+06
NNVNESWK-HexNAc(2)Hex(9)	Q9NUC0	NA	NA	1.17738e+06	NA	NA	1.0409e+07
KEDWNNVTK-HexNAc(3)Hex(6)NeuAc(1)	Q8NCM2	1.05634e+08	NA	NA	4.29685e+07	NA	NA
ENK-HexNAc(6)Hex(5)Fuc(1)NeuAc(2)	A0MZ66	1.08872e+06	NA	NA	1.18157e+06	NA	NA
QAVGGAGPPNPAINGSAPRDLFDMK-HexNAc(6)Hex(5)	P29353	NA	NA	2.00966e+06	NA	NA	1.37515e+06
EPTGVEENK-HexNAc(1)	Q7Z6E9	12386889	NA	NA	1.30416e+07	NA	NA
VVGSFDEVPPTSDENVTVTETK-HexNAc(2)Hex(9)	P22760	NA	1.19595e+07	6.46271e+06	NA	1.86403e+07	1.00654e+07
HPSCVNVSK-HexNAc(4)Hex(5)NeuAc(1)	Q9UHN6	NA	1.94498e+07	NA	NA	1.24709e+07	NA
ISSLQTTEKNDTVAGQGER-HexNAc(2)Hex(7)	P06756	12528836	8.51842e+06	4.98029e+06	2.26541e+06	3.98435e+06	2.37926e+06
GNVTQHVQGHR-HexNAc(2)Hex(7)	Q15043	6.38162e+06	7.66072e+06	NA	6.9103e+06	9.8411e+06	NA
NR-HexNAc(5)Hex(4)NeuAc(2)	Q4KMQ2	NA	NA	2.3074e+06	NA	NA	2.3074e+06
NLAMGVNLTSMSK-HexNAc(2)Hex(8)	P12004	NA	1.1519e+08	NA	NA	1.1519e+08	NA
NESCSENYTTDFIYQLYSEEGK-HexNAc(2)Hex(9)	Q01813	NA	6.21911e+07	NA	NA	4.90044e+07	NA
GNVTQHVQGHR-HexNAc(5)Hex(6)Fuc(1)NeuAc(3)	Q15043	294324182	354238308	243134034	5.12834e+08	629936001	430073520
HNNDTQHIWESDSNEFSVIADPR-HexNAc(3)Hex(3)Fuc(1)	P14625	1.25698e+07	1.86447e+07	7.30227e+06	1.26879e+07	1.09581e+07	4056636
GSLSYLNVTR-HexNAc(2)Hex(10)	P07339	6.87396e+06	NA	NA	1.78819e+07	NA	NA
NESVR-HexNAc(9)Hex(1)	Q92542	NA	379178	NA	NA	1.08918e+07	NA
ALMNGSESR-HexNAc(2)Hex(8)	P35613	5.56005e+07	6.22864e+07	NA	2.42294e+07	2.69015e+07	NA
LLNINPNK-HexNAc(6)Hex(7)NeuAc(1)	P11279	NA	NA	2.2574e+07	NA	NA	2.83285e+07
AASMNHTK-HexNAc(2)Hex(6)	Q9UBV2	NA	1.14272e+06	NA	NA	925291	NA
PALTPFEFQKLLNNLTSIK-HexNAc(2)Hex(9)	P11047	658977	NA	NA	1.23612e+07	NA	NA
DFGSEPQMADHLPPQESRLQNTSSRPGMYPPPGSYR-HexNAc(3)Hex(4)Fuc(1)	P49750	NA	2.54836e+07	NA	NA	657606	NA
WKGCIHDNR-HexNAc(2)Hex(1)	Q8WXD9	NA	NA	6.01738e+06	NA	NA	5.82924e+06
EEDAGEWITVNQTTTANRYLKVSDLQQGK-HexNAc(4)Hex(4)Fuc(1)NeuAc(1)	P54296	NA	NA	1557364	NA	NA	786715
YHYNGTFEDGK-HexNAc(2)Hex(6)	Q96AY3	2.23332e+07	2.82387e+07	1.00669e+07	1.90241e+07	2.00207e+07	9.31972e+06
PNQTSK-HexNAc(7)Hex(4)	P15586	8.94352e+06	NA	NA	3.91603e+07	NA	NA
VSTVYANNGSVLQGTSVASVYHGK-HexNAc(2)Hex(8)	Q15166	1.13175e+07	NA	NA	1.76681e+07	NA	NA
TILVDNNTWNNTHISR-HexNAc(6)Hex(7)NeuAc(4),HexNAc(2)Hex(10)	P46977	4.0574e+06	NA	NA	1.02815e+07	NA	NA
NMTISR-HexNAc(2)Hex(8)	P06756	7.91623e+06	NA	NA	1.29e+07	NA	NA
RNESHLIDFR-HexNAc(2)Hex(8)	Q9UJ14	NA	9.2849e+06	NA	NA	4.28376e+06	NA
RPNQSQPLPPSSLQR-HexNAc(2)Hex(8)	Q92542	5.35164e+07	4.22759e+07	3.04832e+07	8.33398e+07	7.57493e+07	4.98166e+07
YHYNGTFEDGKK-HexNAc(2)Hex(5)	Q96AY3	8.95389e+06	8.03737e+06	NA	4.71369e+06	4.21403e+06	NA
RNWTITR-HexNAc(2)Hex(6)	P19022	3.08958e+06	NA	NA	3.08958e+06	NA	NA
ENK-HexNAc(5)Hex(3)Fuc(1)NeuAc(1)	A0MZ66	NA	NA	3.14931e+06	NA	NA	1.42442e+07
IQNILSEKPTVTTVYANNGSVLQGSSVASVYDGK-HexNAc(2)Hex(10)	Q15165	1.64004e+06	NA	NA	3.76237e+06	NA	NA
DLAQQINLSPK-HexNAc(2)Hex(9)	Q8TC59	5.089e+07	NA	NA	2.6823e+07	NA	NA
VNGSSK-HexNAc(4)Hex(5)NeuAc(1)0	P48436	4.53344e+06	NA	NA	3.24369e+06	NA	NA
NDTLQEAK-HexNAc(2)Hex(9)	Q92896	1.61028e+07	1.79659e+07	NA	3.68379e+06	4.32751e+06	NA
EENK-HexNAc(2)Hex(1)	Q5SSJ5	NA	NA	228237	NA	NA	1.86586e+07
EEEELAYDWSDNNSNISAKR-HexNAc(9)Hex(3)Fuc(1)	Q9UPN3	NA	1.24713e+07	NA	NA	2.57923e+07	NA
NR-HexNAc(4)Hex(5)NeuAc(2)	Q4KMQ2	NA	8.9836e+06	NA	NA	7.78198e+06	NA
EEDEEEQALWFNGTTDNWDQGWLAPGDWVFK-HexNAc(6)Hex(6)	Q6H9L7	NA	NA	1.69133e+06	NA	NA	1.47912e+06
AGAGDFMRYHYNGSLMDGTLFDSSYSR-HexNAc(7)Hex(6)	Q96AY3	2.46345e+06	NA	NA	2.44377e+06	NA	NA
NR-HexNAc(7)Hex(7)Fuc(1)NeuAc(3)	Q4KMQ2	NA	NA	2.02416e+06	NA	NA	2.02416e+06
AENQTAPGEVPALSNLRPPSR-HexNAc(2)Hex(7)	P28300	1.35694e+07	2.23711e+07	4.90977e+06	1.52963e+07	21452046	7.11569e+06
HNNDTQHIWESDSNEFSVIADPR-HexNAc(2)Hex(6)	P14625	1214432965	1.31706e+08	7.93371e+08	1071885039	2.11004e+08	5.10538e+08
EEEELAYDWSDNNSNISAKR-HexNAc(5)Hex(4)Fuc(1)NeuAc(1)	Q9UPN3	NA	7.41283e+06	NA	NA	9.28907e+06	NA
NATSYPPMCTQDPK-HexNAc(2)Hex(8)	P23141	1.11149e+07	1.69163e+07	9.56777e+06	4155745	1.52772e+07	5.71526e+06
EEEENLTR-HexNAc(11)Hex(11)NeuAc(1)	P56277	NA	NA	1.47257e+06	NA	NA	4.08188e+06
VVVVDGKNESEYTVK-HexNAc(2)Hex(8)	P78536	10707791	6.23101e+06	NA	2.95078e+06	7.64013e+06	NA
DHLLLPATTHNK-HexNAc(2)Hex(10)	P18850	3.72093e+06	NA	NA	2.69722e+06	NA	NA
DYYLNK-HexNAc(6)Hex(7)Fuc(1)NeuAc(1)	P42892	NA	2.0035e+07	NA	NA	6.502e+06	NA
DPGAAVPGAANASAQQPR-HexNAc(2)Hex(9)	P28300	1.49818e+08	1.63571e+08	8.54764e+07	9.39718e+07	1.04577e+08	4.27401e+07
HNNDTQHIWESDSNEFSVIADPR-HexNAc(6)Hex(6)Fuc(1)NeuAc(1)	P14625	NA	6.48225e+06	NA	NA	1.32046e+06	NA
GINESYKK-HexNAc(4)Hex(7)Fuc(1)	P50897	7.0383e+06	NA	NA	2.65445e+06	NA	NA
EEEELAYDWSDNNSNISAK-HexNAc(3)Hex(5)NeuAc(1)	Q9UPN3	NA	NA	8.10568e+06	NA	NA	2.24726e+07
EEESSGNISK-HexNAc(2)Hex(9)	Q7Z6E9	1.10208e+07	NA	NA	3.03126e+06	NA	NA
NVTWK-HexNAc(7)Hex(6)	P50454	NA	NA	6.58378e+06	NA	NA	5.74889e+06
NISGVVLADHSGAFHNK-HexNAc(2)Hex(9)	Q92542	2.76844e+07	2.4427e+07	1.58388e+07	2.86597e+07	2.99764e+07	1.38611e+07
GPGIKPNQTSK-HexNAc(4)Hex(4)	P15586	NA	NA	6.09428e+07	NA	NA	1.04315e+07
ENK-HexNAc(5)Hex(6)NeuAc(2)	A0MZ66	4.48779e+06	NA	NA	3.48575e+06	NA	NA
VTNSNANAASPLIVAGYNVSGSVR-HexNAc(6)Hex(4)	Q15155	9.42014e+07	NA	NA	9.80312e+07	NA	NA
GICNSSDVR-HexNAc(2)Hex(9)	O75882	NA	9.57e+06	NA	NA	9.9665e+06	NA
VNNTLSSQISR-HexNAc(2)Hex(8)	P11047	8.70505e+07	4.92708e+07	5.95211e+07	1.1339e+08	7.58506e+07	6.92604e+07
ANHSGAVVLLK-HexNAc(2)Hex(9)	P23229	1.20213e+07	1.17426e+07	NA	1.71224e+07	1.65215e+07	NA
IHNVTASDSGK-HexNAc(2)Hex(8)	O00481	1.00132e+07	NA	NA	4.66588e+06	NA	NA
TYTYADTPDDFQLHNFSLPEEDTK-HexNAc(2)Hex(9)	P04062	3.77349e+06	4.44819e+06	NA	3.28459e+06	406307	NA
NHTL-HexNAc(2)Hex(8)	Q8NBJ4	NA	4.05124e+06	NA	NA	3.2361e+06	NA
KQPSPTPGNATGGPLPVSAASQAHQASHQPLYLNHP-HexNAc(2)Hex(8)	Q99941	NA	1.4364e+07	NA	NA	4.98347e+07	NA
SLSNSTAR-HexNAc(2)Hex(10)	P50454	1.90275e+07	NA	NA	2.03738e+07	NA	NA
LLNINPNK-HexNAc(6)Hex(7)NeuAc(2)	P11279	2.85818e+07	NA	NA	5.52478e+07	NA	NA
NNSNNFDLNR-HexNAc(3)Hex(6)NeuAc(1)	O75976	4.31621e+07	5.46032e+07	2.18779e+07	5.62625e+06	3374899	2.51457e+06
ISSLQTTEKNDTVAGQGER-HexNAc(2)Hex(8)	P06756	9.32123e+07	6.39671e+07	3.91519e+07	4.62057e+07	4.06489e+07	1.71415e+07
IVNYTPDLPK-HexNAc(2)Hex(9)	P08254	NA	NA	2.25338e+07	NA	NA	2.34992e+07
HNNDTQHIWESDSNEFSVIADPR-HexNAc(3)Hex(5)Fuc(1)	P14625	2.27703e+06	NA	NA	1.28158e+06	NA	NA
EIRLSENASK-HexNAc(2)Hex(9)	O75151	3.56935e+07	NA	NA	1.89945e+07	NA	NA
VHPGETNSSWIMK-HexNAc(2)Hex(9)	Q8NEM8	NA	NA	107000	NA	NA	6.38254e+06
PVNQTAR-HexNAc(2)Hex(8)	A0MZ66	NA	2.94451e+07	NA	NA	2.62523e+07	NA
YHVLHINTTK-HexNAc(3)Hex(5)NeuAc(1)0	Q7LGA3	2.91958e+07	NA	NA	4.56624e+06	NA	NA
GNGSRPSSPEEVK-HexNAc(4)Hex(3)Fuc(1)	Q05707	2.63929e+07	2.2007e+07	9.26844e+06	8.91563e+06	9.45171e+06	3.42257e+06
QDSNR-HexNAc(4)Hex(4)Fuc(1)	Q9Y520	NA	NA	1.70893e+07	NA	NA	1.24225e+07
GPGIKPNQTSK-HexNAc(2)Hex(9)	P15586	1.05543e+08	2.08253e+07	4.27739e+07	1.52879e+08	2.08253e+07	5.6905e+07
CHEGNGTFECGACR-HexNAc(2)Hex(9)	P05556	7.14231e+06	8256074	1.47477e+06	6866898	8.4025e+06	1.76001e+06
PNNMSR-HexNAc(3)Hex(5)NeuAc(1)	O14647	NA	NA	4.37928e+06	NA	NA	979778
YHSQTYGNGSK-HexNAc(2)Hex(8)	Q13438	1.84097e+07	1.48057e+07	NA	2.49743e+07	1.90237e+07	NA
FLRYNCSIESPR-HexNAc(4)Hex(4)	O00469	2.27169e+06	NA	NA	551213	NA	NA
NQNESVSEIGGK-HexNAc(2)Hex(9)	Q68CR1	3.07685e+07	3.54852e+07	1.5054e+07	2.21186e+07	2.64715e+07	1.24068e+07
NK-HexNAc(5)Hex(4)NeuAc(1)	Q4KMQ2	NA	NA	2.95122e+06	NA	NA	2.95122e+06
LNSSTIK-HexNAc(6)Hex(7)NeuAc(3)	P13473	6.02597e+07	NA	NA	6.70524e+07	NA	NA
EDEEEDEEEEEQTDPKKPTTDEGTASSEVNATEEMSTLVNYIEPVK-HexNAc(2)Hex(4)	Q01970	NA	NA	687804	NA	NA	403302
NR-HexNAc(7)Hex(8)Fuc(1)NeuAc(3)	Q4KMQ2	NA	NA	1.05963e+06	NA	NA	3.67125e+06
KKGDGGGAGGGGGGGGSGGGGSGGGGGGGSSRPPAPQENTTSEAGLPQGEAR-HexNAc(7)Hex(3)	Q9UKM9	5.82712e+06	NA	NA	1.35608e+06	NA	NA
EEEENLTRK-HexNAc(5)Hex(4)NeuAc(1)	P56277	NA	NA	5.34688e+06	NA	NA	1.01383e+06
RGDDLYTNVTISLVESLVGFEMDITHLDGHK-HexNAc(2)Hex(9)	Q9UBS4	NA	NA	5.41038e+06	NA	NA	4.74519e+06
VASVININPNTTHSTGSCR-HexNAc(6)Hex(8)NeuAc(1)	P13473	NA	NA	1.89261e+06	NA	NA	4.10526e+07
DHLLLPATTHNK-HexNAc(2)Hex(9)	P18850	8.62588e+06	9.11132e+06	4.93628e+06	5.81419e+06	5.69423e+06	2.90469e+06
TTLVDNNTWNNSHIALVGK-HexNAc(2)Hex(9)	Q8TCJ2	4.21114e+08	3.9129e+08	2.24777e+08	3.42475e+08	3.56414e+08	1.89341e+08
NK-HexNAc(5)Hex(6)NeuAc(2)	Q4KMQ2	NA	NA	2.9484e+06	NA	NA	2.9484e+06
GQTALGFLYASGLGVNSSQAK-HexNAc(3)Hex(6)NeuAc(1)	Q9UBV2	NA	NA	3.82421e+07	NA	NA	1.35654e+07
SLSNSTAR-HexNAc(2)Hex(8)	P50454	5.02053e+07	1175536573	3.54314e+08	5.02053e+07	1195910148	4.04199e+08
NLTIR-HexNAc(6)Hex(7)Fuc(1)NeuAc(2)	P15924	NA	NA	3.94257e+07	NA	NA	4.90767e+07
NISGVVLADHSGAFHNK-HexNAc(2)Hex(8)	Q92542	3.35362e+07	2.89698e+07	1.29591e+07	3.03152e+07	24038858	1.19295e+07
ILNGSNK-HexNAc(2)Hex(8)	Q9UBV2	1.19318e+07	NA	NA	1.28607e+07	NA	NA
FLQEQNKTK-HexNAc(2)Hex(9)	C9JPN9	7.87857e+07	NA	NA	7.80828e+07	NA	NA
NNISLVK-HexNAc(2)Hex(1)	Q9UHN6	NA	NA	9.44343e+06	NA	NA	9.45502e+06
EEEELAYDWSDNNSNISAKRNYFSELTMELEEK-HexNAc(2)Fuc(1)	Q9UPN3	NA	NA	678211	NA	NA	934293
KKEDALNETR-HexNAc(5)Hex(3)Fuc(1)	P10909	NA	5.87993e+06	NA	NA	3.03743e+06	NA
YHVLHINTTK-HexNAc(3)Hex(6)NeuAc(1)0	Q7LGA3	3.91882e+07	NA	NA	3.10599e+07	NA	NA
DPGAAVPGAANASAQQPR-HexNAc(2)Hex(8)	P28300	4.17621e+07	5.91554e+07	2.3872e+07	4.52445e+07	4.87907e+07	1.82135e+07
ENK-HexNAc(7)Hex(7)	A0MZ66	NA	NA	426262	NA	NA	1.17755e+06
ATAINASR-The 'N	Q6GYQ0	NA	NA	1.02601e+06	NA	NA	2.60335e+06
PNVTGRR-HexNAc(2)Hex(6)	O15230	NA	3.96712e+06	NA	NA	663010	NA
KKEDALNETR-HexNAc(2)Hex(10)	P10909	3.04047e+07	NA	NA	1.34156e+07	NA	NA
SQYDYTDHQNSSSYYSHAAGQGTGLYSTFTYMNPAQR-HexNAc(6)Hex(3)Fuc(1)NeuAc(1)	P48436	3.72396e+07	3.68714e+07	2.17546e+07	3.87748e+07	3.18033e+07	2.90026e+07
AAGAAVLLVEMLERAAFFGVTANLVLYLNSTNFNWTGEQATR-HexNAc(2)	Q8IY34	NA	NA	6.34622e+06	NA	NA	3.12858e+06
NWSLSQVNVSHAR-HexNAc(2)Hex(8)	P55291	4.64293e+07	NA	NA	4.64293e+07	NA	NA
ENK-HexNAc(5)Hex(6)NeuAc(1)	A0MZ66	NA	NA	3.45373e+06	NA	NA	6.58157e+06
SANSTLAQALHWTR-HexNAc(2)Hex(1)	Q9BU23	NA	1.05064e+07	NA	NA	1.74951e+07	NA
YIHQNYTK-HexNAc(2)Hex(10)	Q02809	3.57268e+06	NA	NA	4.25133e+06	NA	NA
GICNSSDVR-HexNAc(2)Hex(8)	O75882	1.64005e+07	NA	NA	1.06812e+07	NA	NA
DHHGANFSCR-HexNAc(2)Hex(8)	P05362	NA	6.4191e+06	NA	NA	3.40895e+06	NA
NVSGK-HexNAc(6)Hex(7)Fuc(1)NeuAc(1)	Q9UPP5	2.43784e+07	NA	NA	3.96238e+06	NA	NA
DPAFKAANGSLRALQATVGNSYK-HexNAc(2)Hex(9)	P11279	NA	8.01275e+06	NA	NA	2.39765e+07	NA
PNVTGR-HexNAc(4)Hex(6)NeuAc(1)	O15230	NA	NA	1.03723e+07	NA	NA	4.91567e+06
LNSSTIK-HexNAc(7)Hex(8)NeuAc(1)	P13473	NA	210660725	NA	NA	7.47635e+07	NA
HTNMNLTQLK-HexNAc(6)Hex(3)	Q15165	NA	129212819	NA	NA	9.44679e+07	NA
HLNSSHPR-HexNAc(2)Hex(6)	Q5JTV8	2.81733e+06	4.30381e+07	NA	2.81733e+06	4.3611e+07	NA
AASMNHTK-HexNAc(6)Hex(8)Fuc(1)NeuAc(1)	Q9UBV2	NA	1.18229e+06	NA	NA	2.29206e+06	NA
LENITTGTYTIHAQK-HexNAc(2)Hex(9)	P69849	1.50354e+08	1.97043e+08	NA	1.08289e+08	1.27097e+08	NA
DVNCSVMGPQEK-HexNAc(2)Hex(7)	P53634	6954740	NA	NA	2.11526e+06	NA	NA
VTNSNANAASPLIVAGYNVSGSVR-HexNAc(2)Hex(9)	Q15155	4.91249e+07	NA	21319468	1.06391e+08	NA	50136141
MYSEGSDIVPQSNETALHYFK-HexNAc(2)Hex(9)	Q9UBV2	3.11183e+06	1.67279e+07	2.80152e+06	957694	8.07824e+06	742012
EQEAAMEIQEPAANK-HexNAc(6)Hex(7)NeuAc(2)	Q92576	NA	4.03378e+06	NA	NA	1.42063e+06	NA
EAGPEPPPPLSVYHNGTGTVR-HexNAc(6)Hex(4)NeuAc(1)	Q8WXD9	NA	NA	1.33136e+07	NA	NA	963999
ANTTQPGIVEGGQVLK-HexNAc(4)Hex(5)Fuc(1)NeuAc(1)	P06756	1.05798e+08	95955927	5.27798e+07	1.42829e+07	1.60619e+07	7.05596e+06
EEEPVFTRQDSNR-HexNAc(6)Hex(3)Fuc(1)NeuAc(1)	Q9Y520	NA	21543532	NA	NA	1.10262e+06	NA
PGNLSRPPPVVVPHQPR-HexNAc(2)Hex(9)	Q9BU23	3.00037e+07	2.89316e+07	1.79291e+07	4.66474e+07	3.94806e+07	1.8652e+07
EEEELAYDWSDNNSNISAKR-HexNAc(6)Hex(3)Fuc(1)	Q9UPN3	NA	1.09002e+07	NA	NA	5.81878e+06	NA
NYTADYDK-HexNAc(2)Hex(8)	O75477	2.35905e+08	2.68495e+08	1.52729e+08	2.49179e+08	308256534	1.17861e+08
EQEAAMEIQEPAANK-HexNAc(7)Hex(4)	Q92576	NA	5.21318e+06	NA	NA	4.38491e+06	NA
EEEELAYDWSDNNSNISAK-HexNAc(6)Hex(7)NeuAc(2)	Q9UPN3	NA	NA	3.37145e+06	NA	NA	2.44737e+06
DLGPTLANSTHHNVR-HexNAc(4)Hex(5)Fuc(1)NeuAc(2)	P04062	3.12426e+07	3.61177e+07	1.87156e+07	3.92836e+06	6.8091e+06	2.21886e+06
KDTCTQECSYFNITK-HexNAc(2)Hex(9)	P05556	1.54849e+07	1.77815e+07	10148515	2.0416e+07	1.41079e+07	9.59415e+06
DYYLNK-HexNAc(6)Hex(8)NeuAc(1)	P42892	2.25546e+06	NA	NA	2.54674e+06	NA	NA
EEEPVFTRQDSNR-HexNAc(8)Hex(9)Fuc(1)	Q9Y520	NA	NA	3.14996e+06	NA	NA	6.70497e+06
AANGSLR-HexNAc(4)Hex(4)NeuAc(1)0	P11279	4.58759e+06	NA	NA	1.05659e+07	NA	NA
GHTLTLNFTR-HexNAc(2)Hex(8)	P11279	NA	5.89316e+06	NA	NA	7.24306e+06	NA
IPAINQTITEANEK-HexNAc(6)Hex(8)Fuc(1)NeuAc(1)	P11047	4.29714e+06	NA	NA	3.70952e+07	NA	NA
VNNTLSSQISR-HexNAc(2)Hex(7)	P11047	1.2884e+07	1.23858e+07	6.2444e+06	1.45808e+07	8.12797e+06	4.856e+06
TCHESYNR-HexNAc(2)Hex(6)	P33908	1.43882e+06	NA	NA	527180	NA	NA
KKNSTAYFR-HexNAc(2)Hex(8)	Q8NBL1	NA	659568	NA	NA	847720	NA
LRNPCTSEQNCTSPFSYK-HexNAc(2)Hex(7)	P05556	NA	NA	1.4722e+07	NA	NA	11829582
ALSPNSTISSAPK-HexNAc(2)Hex(7)	Q9UH99	NA	1.59139e+07	NA	NA	7.15548e+06	NA
GTNYTVR-HexNAc(6)Hex(5)Fuc(1)NeuAc(1)	P07942	NA	NA	1.15504e+07	NA	NA	8.0251e+06
VIINDTEDEPTLEFDKK-HexNAc(2)Hex(9)	Q86XX4	1.16043e+07	1.20051e+07	6.77211e+06	1.10359e+07	7.94747e+06	6.12528e+06
QERDEDNLNYTDSFDNR-HexNAc(2)Hex(7)	A6NGE4	NA	NA	1.0487e+06	NA	NA	1.68399e+07
LRNPCTSEQNCTSPFSYK-HexNAc(2)Hex(9)	P05556	NA	1.18987e+07	5.55612e+06	NA	1.03187e+07	8.0817e+06
NQTNLER-HexNAc(2)Hex(9)	Q8NBJ4	2.03242e+07	2.23293e+07	9.79009e+06	1.20947e+07	12577493	5.14352e+06
LENITTGTYTIHAQK-HexNAc(2)Hex(9)	Q15155	NA	NA	8.17828e+07	NA	NA	4.1358e+07
EEEELAYDWSDNNSNISAKR-HexNAc(2)Hex(1),HexNAc(8)Hex(7)	Q9UPN3	NA	NA	2.51838e+06	NA	NA	1.487e+06
KWGHNITEFQQR-HexNAc(2)Hex(9)	Q96HE7	2.53187e+07	2.55005e+07	1.13872e+07	2.12331e+07	2.75819e+07	1.16866e+07
DNATLQATLHAAR-HexNAc(2)Hex(8)	O15230	5.01813e+07	4.45903e+07	NA	1.05528e+07	7.72268e+06	NA
EDPSPENR-HexNAc(8)Hex(9)Fuc(1)NeuAc(3)	Q01826	1.86529e+07	NA	NA	8.56949e+06	NA	NA
NESCSENYTTDFIYQLYSEEGK-HexNAc(2)Hex(6)	Q01813	NA	2.9253e+06	NA	NA	5.70705e+06	NA
NQTLR-HexNAc(2)Hex(7)	P38435	2.6251e+07	NA	NA	2.42579e+07	NA	NA
KNNTYLVK-HexNAc(5)Hex(6)Fuc(1)NeuAc(3)	Q6P4E1	NA	1.42655e+07	NA	NA	8.28471e+07	NA
YPHKPEINSTTHPGADLQENFCR-HexNAc(2)Hex(8)	P00734	2.93526e+07	NA	8.14767e+06	8784371	NA	6828796
NHT-HexNAc(8)Hex(8)	Q8NBJ4	NA	NA	1.43974e+06	NA	NA	1.43974e+06
NHSCSEGQISIFR-HexNAc(2)Hex(9)	O75882	2.83791e+07	3.74305e+07	18887276	1.23782e+07	1.76537e+07	7.04288e+06
HLLENSTASVSEAER-HexNAc(2)Hex(8)	P42892	NA	1.2473e+07	3550990	NA	5.87676e+06	2.10204e+06
EQEAAMEIQEPAANK-HexNAc(4)Hex(4)Fuc(1)	Q92576	NA	8.11532e+06	NA	NA	4.08426e+06	NA
SFMVNWTHAPGNVEK-HexNAc(6)Hex(3)	Q05707	5.40846e+06	NA	NA	3.75178e+06	NA	NA
TYTYADTPDDFQLHNFSLPEEDTK-HexNAc(2)Hex(1)	P04062	NA	2959788	NA	NA	1.3349e+06	NA
GNVTQHVQGHR-HexNAc(2)Hex(8)	Q15043	7.46963e+07	2.96938e+06	12143850	9.5566e+07	3.91458e+06	1.42316e+07
NVTVK-HexNAc(5)Hex(6)Fuc(1)NeuAc(3)	O75976	2.27187e+07	2.71161e+07	1.24514e+07	4.24652e+07	3.22784e+07	2.57773e+07
EEEENLTRK-HexNAc(4)Hex(3)	P56277	NA	NA	5.26479e+06	NA	NA	2.52982e+06
KKEDALNETR-HexNAc(2)Hex(8)	P10909	1.12854e+08	2.17625e+07	4.07803e+07	3.94224e+07	6.76701e+06	1.28604e+07
TSNSSQVSNEQDKIDAYK-HexNAc(2)Hex(7)	Q5JRA6	1.49684e+07	1.70409e+07	NA	3259130	8.91319e+06	NA
YTSYNVSEK-HexNAc(2)Hex(9)	Q86XX4	1.48463e+07	1.83712e+07	7.17901e+06	8.59929e+06	9.14774e+06	4.0462e+06
NR-HexNAc(6)Hex(7)NeuAc(4)	Q4KMQ2	NA	NA	1.25921e+06	NA	NA	2.53909e+06
NISQVLEK-HexNAc(2)Hex(8)	O14672	1.05081e+07	NA	7.83506e+06	5.19915e+06	NA	3.43662e+06
NESVR-HexNAc(6)Hex(9)Fuc(1)NeuAc(2)	Q92542	NA	910902	NA	NA	14018581	NA
AVNKTTNSK-HexNAc(2)Hex(7)	Q8TB92	2.53263e+06	NA	NA	1.66093e+06	NA	NA
EEEPVFTRQDSNR-HexNAc(5)Hex(4)Fuc(1)NeuAc(1)	Q9Y520	NA	1.74505e+06	NA	NA	2.80538e+06	NA
IAPASNVSHTVVLR-HexNAc(6)Hex(4)	P43308	NA	49342968	NA	NA	4.79957e+07	NA
MMNDSCQNLPK-HexNAc(2)Hex(7)	Q8IYT4	NA	1.70003e+06	NA	NA	6.05449e+07	NA
ANISHK-HexNAc(2)Hex(9)	P01031	1.74669e+07	1.23476e+07	NA	1.81179e+07	1.22529e+07	NA
GTNYTVR-HexNAc(2)Hex(7)	P07942	3.99427e+07	5.69901e+07	7.04258e+06	3.52422e+07	4.92225e+07	1.25284e+07
YHQPGHEAVTSAVDQLQQEFHCCGSNNSQDWR-HexNAc(5)Hex(6)NeuAc(3)	P48509	NA	1.19394e+07	6.02654e+06	NA	4.80258e+06	2.34428e+06
VQPFNVTQGK-HexNAc(6)Hex(8)NeuAc(1)	P13473	NA	NA	250772	NA	NA	1.06132e+07
NLSSTLESFK-HexNAc(9)Hex(3)Fuc(1)	Q86UQ4	1.91492e+07	NA	NA	1.42712e+07	NA	NA
SLSNSTAR-HexNAc(2)Hex(6)	P50454	2.88756e+08	3.3113e+08	9.03106e+07	284303583	3.17684e+08	8.85606e+07
ENGTLK-HexNAc(3)Hex(6)Fuc(1)NeuAc(1)	P18850	NA	NA	7.71055e+06	NA	NA	1.30622e+07
WKGCIHDNR-HexNAc(2)Hex(8)	Q8WXD9	NA	NA	1.04953e+08	NA	NA	5.44636e+07
YIHQNYTK-HexNAc(2)Hex(7)	Q02809	2.58781e+07	3.37027e+07	8.05071e+06	2.95217e+07	3.84409e+07	8.82533e+06
NLTIR-HexNAc(5)Hex(6)Fuc(1)NeuAc(1)	P15924	NA	NA	7.13534e+06	NA	NA	4.61387e+06
NITLR-HexNAc(5)Hex(6)Fuc(1)NeuAc(3)	Q9UHN6	NA	1.06924e+08	NA	NA	1.19892e+08	NA
PNVTGR-HexNAc(4)Hex(5)Fuc(1)NeuAc(2)	O15230	NA	NA	2.00177e+06	NA	NA	1.23933e+07
EEDAGEWITVNQTTTANRYLKVSDLQQGK-HexNAc(6)Hex(4)	P54296	NA	NA	9735114	NA	NA	5.17699e+06
EENK-HexNAc(6)Hex(7)Fuc(1)NeuAc(4)	Q5SSJ5	NA	NA	511205	NA	NA	2.20324e+06
NISQDLEK-HexNAc(2)Hex(9)	P11047	1.57333e+07	7.84843e+06	NA	581571	3.94893e+06	NA
NHTK-HexNAc(5)Hex(4)NeuAc(2)	Q7Z7M0	1.18828e+08	NA	NA	8.54826e+07	NA	NA
EPNFTLK-HexNAc(7)Hex(8)NeuAc(1)	Q92545	NA	2.7526e+07	NA	NA	39777998	NA
TSNSSQVSNEQDKIDAYK-HexNAc(2)Hex(8)	Q5JRA6	4.46064e+07	4.54369e+07	2.83771e+07	2.32149e+07	2.87548e+07	1.03625e+07
AGAGDFMRYHYNGSLMDGTLFDSSYSR-HexNAc(5)Hex(4)NeuAc(1)	Q96AY3	NA	20349885	NA	NA	4.25325e+06	NA
EEEPVFTRQDSNRSEK-HexNAc(5)Hex(5)Fuc(1)	Q9Y520	1.74281e+06	NA	NA	5837067	NA	NA
NLAMGVNLTSMSK-HexNAc(2)Hex(7)	P12004	NA	5.0572e+07	NA	NA	5.0572e+07	NA
EEEQSPEDALLRGLQRTATDFYAELQNSTDLGYANGNLVHGSNQK-HexNAc(6)Hex(9)	Q9UBS9	NA	1.7416e+06	NA	NA	980587	NA
YHYNGTFEDGK-HexNAc(5)Hex(7)Fuc(1)NeuAc(1)	Q96AY3	NA	1.10517e+06	NA	NA	917845	NA
NATSTK-HexNAc(2)Hex(6)	P11047	NA	8.15973e+06	NA	NA	5.65551e+06	NA
MTEAQEDGQSTSELIGQFGVGFYSAFLVADKVIVTSKHNNDTQHIWESDSNEFSVIADPR-HexNAc(7)Hex(4)Fuc(1)	P14625	NA	1.71032e+07	NA	NA	2.17085e+07	NA
LVALAVIDEKNTSVEHTR-HexNAc(6)Hex(4)	Q96JJ7	NA	15881034	NA	NA	7.45165e+06	NA
EEVIELMNDTEK-HexNAc(2)Fuc(1)	Q8NF91	NA	NA	3.62633e+06	NA	NA	1.17124e+07
AAAAAAATAVDEESPFLVAVENGSAPSEPGLVCEPPQPEEEELR-HexNAc(5)Hex(3)	Q5TGJ6	NA	NA	1.99609e+06	NA	NA	1.53997e+06
EEEELAYDWSDNNSNISAK-HexNAc(5)Hex(4)	Q9UPN3	NA	1.00606e+06	NA	NA	2.44254e+07	NA
QYNSTGDYR-HexNAc(2)Hex(8)	O43657	NA	NA	7.00682e+06	NA	NA	1.49029e+07
ENK-HexNAc(5)Hex(4)NeuAc(2)	A0MZ66	4.29747e+06	NA	2.42579e+07	6.80605e+06	NA	1.3109e+07
PFQANNVSLSNMIK-HexNAc(2)Hex(8)	Q9HCG7	NA	1.14216e+07	NA	NA	2.21411e+08	NA
VNWLAHNVSKDNR-HexNAc(2)Hex(9)	O00329	NA	NA	3.22534e+07	NA	NA	4.1867e+07
IAPASNVSHTVVLRPLK-HexNAc(6)Hex(5)	P43308	NA	NA	1.73739e+07	NA	NA	18136242
NCSAAPQPEPAAGLASYPELR-HexNAc(3)Hex(5)NeuAc(1)0	O75718	1.15016e+07	NA	NA	1.85771e+07	NA	NA
QDSNR-HexNAc(4)Hex(4)	Q9Y520	NA	5.33435e+07	NA	NA	2.48422e+07	NA
VNNTAVIEK-HexNAc(2)Hex(9)	Q9H330	10958691	1.11155e+07	5.02826e+06	6.02898e+06	5777493	2.84912e+06
NWSLSQVNVSHAR-HexNAc(2)Hex(7)	P55291	119624368	NA	1.57039e+07	119624368	NA	1.57039e+07
NLGNNTK-HexNAc(2)Hex(9)	Q16880	NA	3.43496e+06	NA	NA	3.43496e+06	NA
HNNDTQHIWESDSNEFSVIADPR-HexNAc(2)Hex(9)	P14625	7.01975e+07	6.15541e+07	390585970	6.69591e+07	4.36845e+07	8.42414e+07
AAEAERAAAAAAATAVDEESPFLVAVENGSAPSEPGLVCEPPQPEEEELR-HexNAc(1)Fuc(1)	Q5TGJ6	NA	NA	7.37709e+07	NA	NA	4.15823e+06
KNLTLMATTSQLPK-HexNAc(2)Hex(8)	P11117	NA	NA	4.09544e+06	NA	NA	1.31567e+07
NK-HexNAc(6)Hex(7)NeuAc(4)	Q4KMQ2	NA	NA	1.85673e+06	NA	NA	2.73547e+06
AEFNITLIHPK-HexNAc(2)Hex(9)	P15144	NA	NA	1.20774e+07	NA	NA	955641
NQTLAGEYFHK-HexNAc(9)Hex(6)Fuc(1)	Q68CR1	3.83186e+06	NA	NA	2519692	NA	NA
NVTNR-HexNAc(2)Hex(9)	P05556	3.3531e+07	3.81819e+07	NA	2.85045e+07	3.49624e+07	NA
VQPFNVTQGK-HexNAc(8)Hex(7)	P13473	NA	55407712	NA	NA	6.40194e+07	NA
HNNDTQHIWESDSNEFSVIADPR-HexNAc(5)Hex(3)Fuc(1)	P14625	5.65692e+06	5.08672e+06	NA	4.55526e+06	7.16726e+06	NA
HNSTGCLR-HexNAc(2)Hex(7)	P10909	1.24543e+07	NA	NA	5.96938e+06	NA	NA
TILVDNNTWNNTHISR-HexNAc(4)Hex(5)NeuAc(2),HexNAc(2)Hex(3)	P46977	5.67116e+06	NA	NA	3.68816e+06	NA	NA
AAGAAVLLVEMLERAAFFGVTANLVLYLNSTNFNWTGEQATRAALVFLGASYLLAPVGGWLADVYLGR-HexNAc(1)	Q8IY34	NA	NA	8.40416e+06	NA	NA	3.22611e+06
EPNSDIPKNSSTK-HexNAc(8)Hex(9)Fuc(1)NeuAc(3)	Q9UPP5	8.14415e+06	NA	NA	2.94677e+06	NA	NA
LSDTTSQSNSTAK-HexNAc(2)Hex(6)	P07942	1.35331e+08	194656918	4.91769e+07	6.91474e+07	9.4058e+07	2.43348e+07
LLNINPNK-HexNAc(6)Hex(7)Fuc(1)NeuAc(2)	P11279	6.67242e+07	56840386	3.9077e+07	1.15791e+08	95547188	6.55812e+07
GKNNQTECFNHVR-HexNAc(2)Hex(6)	Q9NTN9	NA	NA	3.23068e+06	NA	NA	797426
NLNMSR-HexNAc(2)Hex(8)	P38571	NA	1.69993e+07	NA	NA	1.77231e+07	NA
VNWLAHNVSKDNR-HexNAc(2)Hex(8)	O00329	NA	NA	4.9428e+07	NA	NA	4.12024e+07
ENVSNCIQLK-HexNAc(2)Hex(8)	Q9ULC4	NA	578323480	5.41526e+07	NA	2.40195e+07	5.15775e+06
NSTIEAANLAGLK-HexNAc(2)Hex(8)	P48723	1.20499e+07	NA	NA	5.00016e+06	NA	NA
ANISHK-HexNAc(2)Hex(7)	P01031	3.26137e+06	2.73017e+06	NA	3.59972e+06	2.79845e+06	NA
NLGNNTK-HexNAc(2)Hex(10)	Q16880	1.31231e+06	NA	NA	1.29991e+06	NA	NA
EEEENLTR-HexNAc(7)Hex(7)Fuc(1)NeuAc(2)	P56277	NA	NA	556355	NA	NA	7.99523e+06
VNQTFNWNTTK-HexNAc(2)Hex(7)	P33681	NA	NA	1.39361e+07	NA	NA	8.63087e+06
AMFVMNCSINK-HexNAc(2)Hex(9)	Q56P03	NA	1.14604e+06	664190	NA	4.79335e+07	1.54317e+07
QPAFRAVYEALRNCSFEDDNIR-HexNAc(2)Fuc(1)	Q4G148	NA	NA	3.29802e+06	NA	NA	2.5723e+06
NNHTASILDR-HexNAc(7)Hex(7)	P08962	NA	1.12059e+08	6.89628e+07	NA	2.1877e+07	7.45918e+06
TILVDNNTWNNTHISR-HexNAc(2)Hex(10)	P46977	5.89413e+07	NA	NA	3.42407e+07	NA	NA
NITSWK-HexNAc(4)Hex(5)NeuAc(2)	Q7LGA3	9.92436e+06	NA	NA	2.55228e+06	NA	NA
ETHFDTQNNISTMSAEWVSKANAK-HexNAc(2)Hex(9)	Q9H2U1	2.22287e+07	NA	NA	9.92537e+06	NA	NA
RAQAVETNK-HexNAc(2)Hex(8)	P11150	6.46145e+06	6.54665e+06	NA	1.13185e+07	1.06679e+07	NA
EEEPVFTRQDSNR-HexNAc(3)Hex(6)NeuAc(1)	Q9Y520	NA	NA	6.36767e+06	NA	NA	3.83311e+06
VAAANVSVTQPESTGDPNNMTLLAEEAR-HexNAc(6)Hex(7)Fuc(1)NeuAc(1)	P11047	NA	NA	3.39844e+06	NA	NA	678315
YSSNHTEHSQNLR-HexNAc(2)Hex(10)	Q9Y2E5	3.49413e+06	NA	NA	1.49749e+06	NA	NA
NLTLR-HexNAc(2)Hex(9)	P05362	NA	4.27727e+07	NA	NA	3.03276e+07	NA
EEDNR-HexNAc(6)Hex(7)NeuAc(3)	Q6V702	NA	4.86886e+06	NA	NA	23872403	NA
EEEELAYDWSDNNSNISAK-HexNAc(5)Hex(7)	Q9UPN3	NA	NA	1.43518e+06	NA	NA	1.2162e+07
NHSCSEGQISIFR-HexNAc(2)Hex(8)	O75882	1.16738e+07	1.81871e+07	NA	5.19022e+06	1.1912e+07	NA
TQNFTLLVQGSPELK-HexNAc(5)Hex(6)NeuAc(2)	P50895	NA	1.06212e+07	NA	NA	2155856	NA
TPEFHPNK-HexNAc(2)Hex(8)	Q96S16	2.68099e+07	2.6329e+07	1.40781e+07	2.19331e+07	2.32044e+07	1.04529e+07
NVTR-HexNAc(2)Hex(10)	P05556	4.51858e+07	NA	NA	3.74706e+07	NA	NA
NNHTASILDR-HexNAc(5)Hex(6)Fuc(1)NeuAc(1)	P08962	2.81086e+07	2.99608e+07	NA	3.07727e+06	3.1013e+06	NA
DNDSLAAR-HexNAc(4)Hex(5)Fuc(1)NeuAc(2)	P54886	NA	1511154538	2.15979e+08	NA	732828	1.01762e+06
EEEELAYDWSDNNSNISAK-HexNAc(3)Hex(6)	Q9UPN3	NA	NA	1.56306e+06	NA	NA	1.68866e+06
NNATVHEQVGGPSLTSDLQAQSK-HexNAc(2)Hex(7)	P04004	8.65938e+06	1.77911e+07	16570910	6.13844e+06	1.91676e+06	4.58751e+06
IQNILSEKPTVTTVYANNGSVLQGSSVASVYDGK-HexNAc(6)Hex(4)	Q15165	2.31067e+07	NA	NA	1.47236e+07	NA	NA
VQPFNVTQGK-HexNAc(5)Hex(6)NeuAc(1)	P13473	2.01311e+08	1.80054e+07	9.62505e+07	2.48009e+08	1.64657e+07	1.29271e+08
HFNR-HexNAc(2)Hex(9)	Q99941	1.4599e+06	1.66866e+06	NA	1.45688e+06	1.75298e+06	NA
LNPTVTYGNDSFSAK-HexNAc(6)Hex(7)Fuc(1)NeuAc(2)	P05362	NA	4.97292e+07	NA	NA	2.26394e+07	NA
LIDNNKTEK-HexNAc(4)Hex(4)Fuc(1)NeuAc(1)	P07602	NA	6.0394e+06	NA	NA	89565.5	NA
PILNSTSTLHR-HexNAc(2)Hex(9)	Q6UWU2	2.40761e+07	NA	NA	1.62711e+07	NA	NA
KVQRNITVR-HexNAc(2)Hex(7)	P56199	NA	NA	3.59967e+06	NA	NA	3.59967e+06
TVLTPATNHMGNVTFTIPANR-HexNAc(3)Hex(6)NeuAc(1)	P01024	4.70416e+07	NA	NA	2.01695e+07	NA	NA
LSDLSINSTECLHVHCR-HexNAc(2)Hex(9)	P05156	NA	7.23266e+06	NA	NA	4.28613e+06	NA
ALSPNSTISSAPK-HexNAc(2)Hex(8)	Q9UH99	NA	5.05012e+07	2.0086e+07	NA	5.12558e+07	1.75521e+07
GNVTQHVQGHR-HexNAc(8)Hex(9)Fuc(1)NeuAc(3)	Q15043	NA	8.07216e+07	NA	NA	114998650	NA
AMFVMNCSINK-HexNAc(2)Hex(6)	Q56P03	NA	5.314e+06	NA	NA	2.73275e+07	NA
KKEDALNETR-HexNAc(2)Hex(7)	P10909	NA	1.57309e+07	NA	NA	7.76264e+06	NA
YEQLQNETR-HexNAc(2)Hex(9)	P11117	2.85353e+07	1.52195e+07	1.68038e+07	2.37849e+07	5.24286e+06	1.08651e+07
EIRLSENASK-HexNAc(7)Hex(8)NeuAc(1)	O75151	51951284	NA	NA	1.10706e+07	NA	NA
ILLTCSLNDSATEVTGHR-HexNAc(2)Hex(9)	P35613	NA	1.80364e+07	NA	NA	5.61911e+06	NA
LNSSTIK-HexNAc(5)Hex(7)Fuc(1)NeuAc(1)	P13473	2.27342e+07	NA	NA	2.00818e+07	NA	NA
KDTCTQECSYFNITK-HexNAc(2)Hex(6)	P05556	NA	1.66857e+07	NA	NA	6.84049e+06	NA
ENTSDPSLVIAFGRGHTLTLNFTR-HexNAc(6)Hex(4)	P11279	NA	8.86099e+06	NA	NA	9.7034e+06	NA
NK-HexNAc(7)Hex(7)Fuc(1)NeuAc(4)	Q4KMQ2	NA	NA	646705	NA	NA	646705
NISNLQYK-HexNAc(7)Hex(4)Fuc(1)	O76041	2.66308e+07	NA	NA	1.42082e+07	NA	NA
RAQAVETNK-HexNAc(2)Hex(7)	P11150	3.0618e+06	3.12748e+06	NA	3.94093e+06	3.96591e+06	NA
NTSVEHTR-HexNAc(2)Hex(8)	Q96JJ7	1.3378e+07	NA	NA	8.30195e+06	NA	NA
ELPGVCNETMMALWEECK-HexNAc(9)Hex(1)	P10909	NA	NA	3.49058e+06	NA	NA	8318767
YQLGTSPYVYQLTTRPVTDGQPHSINITR-HexNAc(2)Hex(9)	P78357	1.21757e+07	9.44265e+06	6294513	1.36371e+07	1.39875e+07	3.8225e+06
TLSRPSETCNETTK-HexNAc(2)Hex(7)	Q96AY3	NA	1.33334e+08	NA	NA	1.29844e+07	NA
IDSTGNVTNELR-HexNAc(2)Hex(9)	O75882	NA	1.37478e+07	1.30398e+07	NA	1.59793e+07	1.24962e+07
NR-HexNAc(6)Hex(7)Fuc(1)NeuAc(3)	Q4KMQ2	NA	NA	7.50746e+06	NA	NA	7.50746e+06
ANATIEVK-HexNAc(2)Hex(9)	Q9Y639	1.18298e+08	229657770	6.63624e+07	1.44645e+08	2.72603e+08	5.00232e+07
KNSTAYFR-HexNAc(2)Hex(6)	Q8NBL1	3.56726e+06	NA	NA	4.49596e+06	NA	NA
EQEAAMEIQEPAANK-HexNAc(2)Hex(2)	Q92576	NA	3.22915e+07	NA	NA	3.72631e+06	NA
EETVNLTTDSR-HexNAc(2)Hex(5)	Q6UWL2	3.59427e+07	NA	NA	1.08325e+06	NA	NA
KGDGGGAGGGGGGGGSGGGGSGGGGGGGSSRPPAPQENTTSEAGLPQGEAR-HexNAc(3)Hex(3)Fuc(1)	Q9UKM9	5.84924e+06	1.24003e+07	1.63165e+07	6.22338e+06	4453075	2.36029e+06
DHPNATVWR-HexNAc(2)Hex(1)	Q9UMR5	NA	1.03175e+07	NA	NA	9.20271e+06	NA
SENASLVLSSSNQK-HexNAc(2)Hex(9)	P56199	1.93618e+07	2.8671e+07	1.61838e+07	1.00174e+07	1.34128e+07	6.38611e+06
KDNTTVTR-HexNAc(4)Hex(5)Fuc(1)NeuAc(1)	P11279	NA	2.64524e+07	NA	NA	2.48042e+06	NA
NGSK-HexNAc(2)Hex(11)	O75175	NA	NA	579130	NA	NA	601409
VQPFNVTQGK-HexNAc(5)Hex(6)NeuAc(2)	P13473	1.97763e+08	6.45074e+07	3.10114e+07	1.74892e+08	7.72689e+07	3.7746e+07
WKGCIHDNR-HexNAc(3)Hex(4)Fuc(1)NeuAc(1)	Q8WXD9	NA	NA	9.49005e+06	NA	NA	2.19192e+07
LLNINPNK-HexNAc(3)Hex(3)Fuc(1)	P11279	NA	950253	NA	NA	950253	NA
QVGEKAMNASANITSDGVEVLGK-HexNAc(9)Hex(6)Fuc(1)	Q05707	NA	NA	2.58489e+07	NA	NA	5.41052e+07
KENGTLK-HexNAc(4)Hex(5)Fuc(1)NeuAc(2)	P18850	NA	5.56249e+07	NA	NA	7.55866e+06	NA
ENGTLK-HexNAc(5)Hex(6)	P18850	NA	NA	2.41952e+07	NA	NA	3.85244e+07
IQNILSEKPTVTTVYANNGSVLQGSSVASVYDGK-HexNAc(2)Hex(8)	Q15165	7.08278e+07	8.38541e+07	6.60548e+06	51961030	6.67149e+07	4.02279e+06
NDSTR-HexNAc(5)Hex(5)NeuAc(1)	Q70E73	NA	NA	1.21946e+07	NA	NA	4.12038e+06
TLSRPSETCNETTK-HexNAc(2)Hex(8)	Q96AY3	2.67912e+07	3.21136e+07	1.90598e+07	1.5127e+07	1.66655e+07	8.73852e+06
KEENFSSPK-HexNAc(2)Hex(7)	Q96SB8	1.37457e+06	NA	NA	1.16691e+07	NA	NA
SYHNQTISFR-HexNAc(2)Hex(9)	Q68CR1	4.56835e+07	5.12912e+07	2.27846e+07	5.92844e+07	7.05445e+07	2.99047e+07
NK-HexNAc(3)Hex(3)	Q4KMQ2	NA	NA	4.14443e+06	NA	NA	2.8086e+06
YNCSIESPR-HexNAc(2)Hex(7)	O00469	5.71237e+06	8.78801e+06	NA	6.81753e+06	1.152e+07	NA
LNSSTIK-HexNAc(5)Hex(6)NeuAc(1)	P13473	1.99644e+07	2.28063e+07	NA	12786493	1.28661e+07	NA
EQHQKEISELNETFLSDSEK-HexNAc(2)Hex(9)	Q8IWJ2	3.9225e+07	58451094	NA	1.07778e+07	4.25036e+06	NA
ENK-HexNAc(5)Hex(4)Fuc(1)NeuAc(2)	A0MZ66	975830	NA	5.27617e+06	2.49921e+06	NA	3.51405e+06
IAPASNVSHTVVLRPLK-HexNAc(2)Hex(10)	P43308	8.28789e+06	NA	NA	1.67687e+07	NA	NA
EEDNR-HexNAc(7)Hex(7)Fuc(1)	Q6V702	NA	4.79368e+06	NA	NA	7.01364e+07	NA
VASVININPNTTHSTGSCR-HexNAc(5)Hex(6)Fuc(1)NeuAc(3)	P13473	2.75246e+07	NA	NA	8.02363e+07	NA	NA
YHYNGTLLDGTSFDTSYSK-HexNAc(2)Hex(8)	Q96AY3	1.20064e+08	1.47596e+08	8.04857e+07	5.35959e+07	7.21708e+07	3.96499e+07
VASILDHFHLSPQGEDSPCSNESSR-HexNAc(2)Hex(9)	Q86UQ4	17377948	NA	NA	9.6485e+06	NA	NA
YHYNGTFEDGKK-HexNAc(2)Hex(6)	Q96AY3	4.35224e+07	1.65119e+08	2.53838e+07	3.8124e+07	9.08348e+07	1.42748e+07
KIYIPLNK-HexNAc(2)Hex(1)	Q92542	NA	3840328	NA	NA	1.32063e+07	NA
SAEGTFFINK-HexNAc(2)Hex(9)	P06865	NA	10854544	NA	NA	6657240	NA
GYNFSR-HexNAc(2)Hex(9)	P19440	9.02413e+06	NA	NA	1.40036e+07	NA	NA
NITLR-HexNAc(2)Hex(1)	Q9UHN6	NA	2.60884e+07	NA	NA	1.74379e+07	NA
EVGPRNSTNKNK-HexNAc(9)Hex(10)Fuc(1)NeuAc(4)	Q6Y7W6	7.28252e+06	NA	NA	6.35983e+07	NA	NA
YIHQNYTKALAGK-HexNAc(2)Hex(6)	Q02809	NA	NA	1.12424e+07	NA	NA	1.12424e+07
NNHTASILDR-HexNAc(7)Hex(8)Fuc(1)NeuAc(3)	P08962	NA	NA	4.46306e+07	NA	NA	2.47702e+07
IVNETLYENTK-HexNAc(5)Hex(6)Fuc(1)NeuAc(3)	P19075	584830	4.96444e+07	3.08547e+07	8.70637e+06	2.18165e+06	821524
QPSICLCSLEDFLCDFGYYRPENDSK-HexNAc(5)Hex(3)Fuc(1)	Q99523	NA	NA	9.06464e+06	NA	NA	3.77776e+06
IYIPLNK-HexNAc(2)Hex(1)	Q92542	NA	5.17803e+06	NA	NA	1.54941e+06	NA
KLGDCISEDSYPDGNITWYR-HexNAc(2)Hex(8)	Q13740	NA	2.08791e+06	NA	NA	1.03257e+07	NA
AMSSNETAAYK-HexNAc(2)Hex(8)	Q8TCJ2	1.35233e+07	4.87031e+07	9.49429e+07	9.22098e+06	6.46351e+07	2.85763e+07
SYNETK-HexNAc(2)Hex(8)	P04114	7.82444e+06	8.61074e+06	NA	5.63346e+06	4.1698e+06	NA
AMNASANITSDGVEVLGK-HexNAc(4)Hex(4)Fuc(1)NeuAc(1),HexNAc(2)Hex(2)Fuc(1)	Q05707	1.9883e+07	NA	NA	3.18085e+06	NA	NA
NATSYPPMCTQDPK-HexNAc(2)Hex(9)	P23141	8.16833e+06	1.21355e+07	4.24987e+06	2.45546e+06	6.31177e+06	1.89237e+06
ILNGSNKK-HexNAc(2)Hex(8)	Q9UBV2	NA	3.99396e+06	NA	NA	2.90606e+06	NA
NLTIR-HexNAc(6)Hex(7)Fuc(1)NeuAc(1)	P15924	NA	NA	2.30406e+07	NA	NA	2.72239e+07
EEEELAYDWSDNNSNISAKRNYFSELTMELEEK-HexNAc(2)Hex(3)Fuc(1)	Q9UPN3	NA	NA	226469	NA	NA	3.44106e+06
RAQAVETNK-HexNAc(2)Hex(9)	P11150	1.03064e+07	1.05088e+07	NA	5.57573e+06	5.3015e+06	NA
EEEAIQLDGLNASQIRELREK-HexNAc(2)Fuc(1)	P14625	NA	NA	3.94497e+07	NA	NA	2.34986e+07
NK-HexNAc(3)Hex(5)	Q4KMQ2	NA	NA	367715	NA	NA	3.16142e+06
EAAAGRNTSAEK-HexNAc(2)Hex(9)	P78559	1.21266e+07	NA	NA	5.089e+07	NA	NA
NQTK-HexNAc(7)Hex(6)Fuc(1)NeuAc(4)	Q9UPN3	NA	NA	439970	NA	NA	439970
TTLVDNNTWNNSHIALVGK-HexNAc(3)Hex(6)Fuc(1)NeuAc(1)	Q8TCJ2	NA	NA	1.90855e+07	NA	NA	9.54457e+06
VQPFNVTQGK-HexNAc(3)Hex(6)NeuAc(1)	P13473	NA	2.53614e+07	1.92796e+07	NA	3.29901e+07	1.3872e+07
NK-HexNAc(5)Hex(3)Fuc(1)NeuAc(1)	Q4KMQ2	NA	NA	2.59117e+06	NA	NA	2.59117e+06
KIPAINQTITEANEK-HexNAc(2)Hex(9)	P11047	6.24502e+06	NA	NA	2329381	NA	NA
GNGSRPSSPEEVK-HexNAc(2)Hex(9)	Q05707	3.23872e+07	3.05386e+07	NA	1.79619e+07	1.65136e+07	NA
NESDK-HexNAc(8)Hex(9)Fuc(1)NeuAc(4)	P11117	NA	NA	3.28587e+06	NA	NA	2.05021e+07
KIADDKYNDTFWK-HexNAc(2)Hex(8)	P14625	NA	NA	7.83658e+06	NA	NA	2.55844e+06
LQNTSR-HexNAc(2)Hex(8)	Q9UBS9	NA	7.84032e+06	NA	NA	5.09579e+06	NA
NVSR-HexNAc(2)Hex(9)	P78536	NA	1.41981e+07	NA	NA	8.54874e+06	NA
EEEENLTR-HexNAc(7)Hex(8)Fuc(1)NeuAc(3)	P56277	NA	NA	375624	NA	NA	1374470
EDFHYNDTAGYFIIGGSR-HexNAc(6)Hex(5)Fuc(1)NeuAc(2)	Q68CR1	NA	4.22386e+06	NA	NA	1.00677e+07	NA
IAPASNVSHTVVLRPLK-HexNAc(2)Hex(9)	P43308	4.28394e+07	3.80035e+08	2.55036e+07	4.28394e+07	7.65717e+08	2.55036e+07
YETTNK-HexNAc(2)Hex(2)Fuc(1)	P13473	684819	NA	NA	93065.1	NA	NA
NRTILGYK-HexNAc(2)Hex(7)	Q6VY07	NA	NA	2.63338e+06	NA	NA	841867
HTNMNLTQLK-HexNAc(2)Hex(7)	Q15165	8.5245e+06	2.56149e+07	NA	9.44105e+06	2.32128e+07	NA
KFNSTQIAAMAPEHEEPR-HexNAc(2)Hex(8)	Q4G148	7.48032e+06	1.12269e+07	NA	6.04081e+06	6.22793e+06	NA
AEFNITLIHPK-HexNAc(6)Hex(7)NeuAc(2)	P15144	1.17394e+07	NA	NA	3.23991e+06	NA	NA
DNHTHSDIQVK-HexNAc(2)Hex(8)	Q8IV08	1.49139e+07	1.64802e+07	NA	6.11472e+06	5.74145e+06	NA
EAGPEPPPPLSVYHNGTGTVR-HexNAc(5)Hex(3)Fuc(1)	Q8WXD9	NA	NA	4.13852e+06	NA	NA	5.11188e+06
LVALAVIDEKNTSVEHTR-HexNAc(2)Hex(8)	Q96JJ7	NA	17613421	NA	NA	8.27293e+06	NA
NK-HexNAc(8)Hex(9)Fuc(1)NeuAc(3)	Q4KMQ2	NA	NA	1.59945e+06	NA	NA	2.90413e+06
ALHALNVTWR-HexNAc(2)Hex(7)	Q9Y2E5	3.80441e+06	NA	NA	1.34312e+07	NA	NA
NK-HexNAc(4)Hex(6)Fuc(1)NeuAc(1)	Q4KMQ2	NA	NA	9.63419e+06	NA	NA	2.38738e+06
NYTADYDK-HexNAc(2)Hex(1)	O75477	NA	9.06621e+06	1.59339e+06	NA	6.00609e+06	3.35359e+06
YNHTGQVIIYR-HexNAc(6)Hex(3)	P56199	2.12778e+07	NA	NA	1.71695e+07	NA	NA
GYNFSR-HexNAc(5)Hex(6)Fuc(1)NeuAc(3)	P19440	3.3743e+07	NA	NA	4.40807e+07	NA	NA
GPGIKPNQTSK-HexNAc(2)Hex(5)	P15586	8.67917e+06	9.61041e+06	4.81346e+06	9.79841e+06	1.13572e+07	4.95293e+06
HNLSLNDCFVK-HexNAc(2)Hex(9)	Q9UJU5	NA	NA	348039	NA	NA	1.10504e+08
HNNDTQHIWESDSNEFSVIADPR-HexNAc(2)Hex(10)	P14625	7.31332e+06	NA	NA	2.68824e+06	NA	NA
NR-HexNAc(4)Hex(5)NeuAc(1)	Q4KMQ2	NA	3.80445e+06	NA	NA	1.57634e+06	NA
EEEPVFTRQDSNR-HexNAc(5)Hex(6)	Q9Y520	NA	8.27389e+06	NA	NA	1.12714e+07	NA
YHYNGTFLDGTLFDSSHNR-HexNAc(2)Hex(7)	O95302	1.47778e+07	2.1188e+07	7.57191e+06	1.0118e+07	1.59335e+07	4.15987e+06
LQNTSR-HexNAc(2)Hex(9)	Q9UBS9	NA	5.39073e+06	NA	NA	5.4761e+06	NA
NVTR-HexNAc(5)Hex(7)Fuc(1)NeuAc(2)	P05556	1.46245e+07	NA	NA	1.5963e+07	NA	NA
VNNTAVIEK-HexNAc(5)Hex(4)NeuAc(2)	Q9H330	NA	NA	1.06027e+07	NA	NA	1.68382e+06
HNSTGCLR-HexNAc(2)Hex(9)	P10909	2.96478e+06	2.29482e+07	NA	2.96478e+06	2.61076e+07	NA
NK-HexNAc(5)Hex(7)Fuc(1)	Q4KMQ2	NA	NA	2.82486e+06	NA	NA	3.38412e+07
NYTADYDK-HexNAc(2)Hex(6)	O75477	1.12224e+07	1.85566e+07	4.70864e+06	3.20965e+07	2.87245e+07	4.17027e+06
GASNLTWR-HexNAc(2)Hex(9)	P15586	1.56139e+07	NA	NA	1.02337e+07	NA	NA
EDALNETR-HexNAc(2)Hex(8)	P10909	NA	2.68737e+07	NA	NA	5.78103e+06	NA
YQNNSPPNNDDQWK-HexNAc(2)Hex(8)	O75841	1.48951e+07	28111662	1.14879e+07	2.08257e+07	2.37028e+07	1.09022e+07
YIHQNYTKALAGK-HexNAc(2)Hex(7)	Q02809	NA	NA	3.20406e+06	NA	NA	3.20406e+06
ENVGIYNLSK-HexNAc(2)Hex(4)	Q15155	NA	NA	1.52324e+07	NA	NA	4.42759e+06
NR-HexNAc(2)Hex(5)	Q4KMQ2	NA	NA	2.65335e+06	NA	NA	2.31197e+06
GDVFTMPEDEYTVYDDGEEKNNATVHEQVGGPSLTSDLQAQSK-HexNAc(2)Hex(8)	P04004	3.98028e+06	NA	565413	3.65083e+06	NA	1.25795e+06
RNQSLSLLYK-HexNAc(2)Hex(8)	Q06481	2.71735e+07	3.57481e+07	NA	2.68681e+07	3.73048e+07	NA
TILVDNNTWNNTHISR-HexNAc(3)Hex(6)Fuc(1)NeuAc(1)	P46977	NA	21074615	NA	NA	1.19634e+07	NA
GTNYTVR-HexNAc(2)Hex(6)	P07942	2.18484e+07	2.72199e+07	1.16177e+07	2.14265e+07	2.45206e+07	1.10491e+07
IPFQNNNSLGFK-HexNAc(2)Hex(8)	Q7Z443	NA	NA	4.1665e+07	NA	NA	4.1665e+07
KLNYTLSQGHR-HexNAc(2)Hex(9)	P15144	1.92576e+07	4.49995e+06	NA	3.80306e+07	5.29137e+06	NA
EEEENLTRK-HexNAc(5)Hex(4)NeuAc(2)	P56277	NA	NA	2.39752e+06	NA	NA	152672
VNFTEIQK-HexNAc(2)Hex(9)	P02771	1.60513e+07	2.45075e+07	6.6161e+06	1.17523e+07	1.76688e+07	6.32701e+06
TAADTTGLQPILNQFTPANISR-HexNAc(2)Hex(9)	P06756	7258919	1.09783e+07	NA	5.33315e+06	1.29624e+07	NA
GINESYKK-HexNAc(2)Hex(5)Fuc(1)	P50897	NA	NA	2.76622e+07	NA	NA	9.76778e+07
KIPAINQTITEANEK-HexNAc(2)Hex(6)	P11047	2.67126e+07	NA	NA	1.26006e+07	NA	NA
NK-HexNAc(8)Hex(9)	Q4KMQ2	NA	NA	214120	NA	NA	727779
SENASLVLSSSNQK-HexNAc(2)Hex(7)	P56199	NA	3.55787e+07	6.37572e+06	NA	18842901	7.65448e+06
LENITTGTYTIHAQK-HexNAc(2)Hex(8)	P69849	NA	146148695	NA	NA	1.29907e+08	NA
ENK-HexNAc(9)Hex(6)	A0MZ66	NA	NA	2451486	NA	NA	1.80997e+06
GHVNITR-HexNAc(2)Hex(9)	P00734	5.76905e+07	1.08984e+08	3.12753e+07	7.10505e+07	1.34117e+08	3.28222e+07
GNGSRPSSPEEVK-HexNAc(2)Hex(8)	Q05707	224905827	2.48611e+08	1.21777e+08	1.64136e+08	1.43406e+08	7.43165e+07
AASMNHTK-HexNAc(2)Hex(8)	Q9UBV2	1.02693e+07	1.08137e+07	NA	1.18647e+07	1.26158e+07	NA
VDKDLQSLEDILHQVENK-HexNAc(2)Hex(9)	P02679	1.95607e+07	1.2094e+07	8.70093e+06	22422324	1.54472e+07	4.8731e+06
VNGEAIYETHTWRSQNDTVTPDVWYTSK-HexNAc(8)Hex(9)Fuc(1)NeuAc(3)	Q9BTY2	NA	NA	2.48081e+07	NA	NA	532588
NR-HexNAc(6)Hex(6)NeuAc(2)	Q4KMQ2	NA	NA	1.72833e+07	NA	NA	1.72833e+07
LSDTTSQSNSTAK-HexNAc(2)Hex(7)	P07942	4.83113e+07	6.31334e+07	NA	2.13731e+07	2.45141e+07	NA
EANFTEGSLK-HexNAc(6)Hex(4)	Q9Y6X0	NA	2.37575e+07	NA	NA	791255	NA
RDPGAAVPGAANASAQQPR-HexNAc(2)Hex(9)	P28300	49535584	3.04858e+07	1.95627e+07	3.16451e+07	3.16781e+07	1.37401e+07
NNATVHEQVGGPSLTSDLQAQSK-HexNAc(2)Hex(9)	P04004	7.02917e+06	7.5521e+06	6.93473e+06	8.7102e+06	8.30239e+06	3.28828e+06
LENITTGTYTIHAQK-HexNAc(2)Hex(7)	P69849	NA	3.3376e+07	NA	NA	6.5775e+07	NA
QNLSPEEK-HexNAc(2)Hex(8)	Q9BY66	2.34418e+07	NA	NA	1.7998e+07	NA	NA
EEEELAYDWSDNNSNISAK-HexNAc(11)Hex(11)NeuAc(1)	Q9UPN3	NA	NA	5.42563e+06	NA	NA	1.94047e+06
KNSTTNYR-HexNAc(2)Hex(8)	A0JNW5	1.16004e+06	1.14911e+06	NA	2.2705e+07	2.75495e+07	NA
VDKDLQSLEDILHQVENK-HexNAc(2)Hex(8)	P02679	45478846	1.35091e+07	1.22628e+07	2.19212e+07	6490339	1.3612e+07
KIQQESLGSAPLMGDDHPNASR-HexNAc(2)Hex(8)	Q5JRA6	3.71981e+07	NA	NA	8.97656e+06	NA	NA
DHHGANFSCRTELDLRPQGLELFENTSAPYQLQTFVLPATPPQLVSPR-HexNAc(3)Hex(5)NeuAc(1)	P05362	7.49838e+06	NA	NA	3.74791e+06	NA	NA
VMSWWDYGYQIAGMANRTTLVDNNTWNNSHIALVGK-HexNAc(2)Hex(11)	Q8TCJ2	2.11209e+07	NA	NA	2.91551e+08	NA	NA
NNHTASILDR-HexNAc(2)Hex(10)	P08962	4.7837e+07	NA	NA	24220307	NA	NA
EQEAAMEIQEPAANK-HexNAc(9)Hex(6)	Q92576	NA	2.47362e+07	NA	NA	2.19065e+07	NA
VIVEGQNAHGEGYVNVTVKPEPR-HexNAc(5)Hex(6)Fuc(1)NeuAc(3)	Q8IZA0	7.14768e+06	NA	NA	667321	NA	NA
PVHHFMNTSTFTEYTVVDESSVAK-HexNAc(2)Hex(6)	P40394	NA	8.7913e+06	NA	NA	1.3828e+08	NA
KIYIPLNK-HexNAc(2)Hex(9)	Q92542	3.00343e+07	2.81874e+07	1.40689e+07	36753843	3.51419e+07	1.55591e+07
IQNILSEKPTVTTVYANNGSVLQGSSVASVYDGK-HexNAc(2)Hex(1)	Q15165	NA	3.11109e+06	1.12556e+06	NA	3.38847e+06	1.09069e+06
HMSLALNR-HexNAc(2)Hex(1)	P06280	NA	2.00984e+07	NA	NA	2.31335e+07	NA
NVTNR-HexNAc(2)Hex(8)	P05556	3.19914e+07	2.54191e+06	NA	27255579	2.54191e+06	NA
ANHSGAVVLLK-HexNAc(5)Hex(6)NeuAc(1)	P23229	2.86147e+07	2.74206e+07	1.58723e+07	2.1395e+07	2.76915e+07	1.5366e+07
ENGTLK-HexNAc(4)Hex(4)NeuAc(1)	P18850	NA	NA	3.70799e+06	NA	NA	2.43563e+06
EEEENLTRK-HexNAc(3)Hex(4)Fuc(1)NeuAc(1)	P56277	NA	NA	872774	NA	NA	2.55917e+07
TVAQNYSSVTHLHSIGK-HexNAc(5)Hex(6)Fuc(1)NeuAc(3)	P14384	NA	2.59659e+07	NA	NA	7.74606e+07	NA
EVGPRNSTNKNK-HexNAc(9)Hex(1)Fuc(1)NeuAc(4)	Q6Y7W6	NA	1.5501e+06	NA	NA	7.61477e+07	NA
VNFSDRVFK-HexNAc(2)Hex(6)	Q96AC1	5.58511e+07	NA	NA	409577	NA	NA
GHTLTLNFTR-HexNAc(4)Hex(6)NeuAc(1)	P11279	4.37226e+07	4.80911e+07	NA	3.89162e+07	4.5689e+07	NA
QDSNR-HexNAc(2)Hex(1)	Q9Y520	NA	2.42852e+06	1.60576e+06	NA	1.07438e+06	1.8538e+06
DTWGLSDEHFQPRPEAVQFFNVTTLQK-HexNAc(2)Hex(9)	O75718	7.83235e+06	7.51206e+06	NA	1.03784e+07	1.15984e+07	NA
TTNSSAADPR-HexNAc(2)Hex(1)	Q9UHN6	NA	6.39801e+06	NA	NA	3.92677e+06	NA
VQPFNVTQGK-HexNAc(5)Hex(7)Fuc(1)NeuAc(1)	P13473	NA	NA	5.02526e+06	NA	NA	4492842
ANISHK-HexNAc(2)Hex(8)	P01031	1.01949e+07	1.84242e+07	NA	8.96796e+06	1.39489e+07	NA
IQNILSEKPTVTTVYANNGSVLQGSSVASVYDGK-HexNAc(3)Hex(5)NeuAc(1)	Q15165	NA	NA	8.57864e+07	NA	NA	1.97285e+07
EEEELAYDWSDNNSNISAKR-HexNAc(2)Hex(2)	Q9UPN3	NA	NA	406344	NA	NA	330181941
YFYLQAVNSEGQNLTR-HexNAc(2)Hex(9)	Q7Z4H8	NA	5.29513e+06	5.71429e+06	NA	7.07123e+06	8.1095e+06
NWSLPNR-HexNAc(2)Hex(1)	P55058	NA	4.54481e+06	NA	NA	2.93386e+06	NA
EENK-HexNAc(5)Hex(5)Fuc(1)NeuAc(1)	Q5SSJ5	3.63881e+06	NA	NA	591476	NA	NA
YHYNGTLLDGTLFDSSYSR-HexNAc(6)Hex(5)Fuc(1)NeuAc(3)	O95302	4.30927e+06	NA	NA	2.33156e+06	NA	NA
INTTADEKDPTNPFR-HexNAc(2)Hex(8)	O14672	3.0238e+07	3.88715e+07	1.3202e+07	3.12168e+06	1.95757e+06	1752780
DLGPTLANSTHHNVR-HexNAc(3)Hex(4)Fuc(1)NeuAc(1)	P04062	3.62064e+06	NA	2.02043e+06	967552	NA	56337.3
VNNTLSSQISR-HexNAc(2)Hex(9)	P11047	4.78681e+07	33168780	3.08001e+06	5.69559e+07	3.59961e+07	4239348
NWTITR-HexNAc(7)Hex(8)Fuc(1)NeuAc(3)	P19022	NA	1.61581e+06	NA	NA	8.52902e+07	NA
EEEPVFTRQDSNRSEK-HexNAc(4)Hex(6)NeuAc(1)	Q9Y520	NA	5.69375e+07	NA	NA	1.34468e+07	NA
SDSPSTSSIPPLNETVSAASLLTTTNQHSSSLGGLSHSEEIPNTTTTQHSSTLSTQQNTLSSSTSSGR-HexNAc(2)	Q14157	NA	8.54857e+06	9.21177e+06	NA	4.52298e+06	3.66069e+06
NITLR-HexNAc(2)Hex(9)	Q9UHN6	NA	4.27727e+07	NA	NA	3.03276e+07	NA
VAAANVSVTQPESTGDPNNMTLLAEEAR-HexNAc(6)Hex(7)Fuc(1)NeuAc(2)	P11047	3.15224e+06	NA	NA	2.13386e+06	NA	NA
QAVGGAGPPNPAINGSAPR-HexNAc(3)Hex(4)	P29353	NA	NA	1.9113e+06	NA	NA	672821
HNSTGCLR-HexNAc(2)Hex(1)	P10909	NA	3.40161e+07	NA	NA	3.42838e+07	NA
NEEYNK-HexNAc(2)Hex(9)	P02763	1.35856e+07	NA	NA	1.32849e+06	NA	NA
GPGIKPNQTSK-HexNAc(2)Hex(8)	P15586	7.15427e+07	6.81508e+06	2.78467e+07	6.49962e+07	6.81508e+06	2.39277e+07
PQTNK-HexNAc(2)Hex(11)	Q14157	NA	NA	1.60902e+06	NA	NA	1.49737e+06
NNHTASILDR-HexNAc(4)Hex(5)Fuc(1)NeuAc(2)	P08962	1.81134e+07	1.6503e+07	NA	7.33611e+06	3.40717e+06	NA
YNHTGQVIIYR-HexNAc(2)Hex(9)	P56199	8.61136e+06	1.33357e+08	75899428	8.61136e+06	2.10652e+08	1.25997e+08
TVNVSVPK-HexNAc(2)Hex(8)	Q96KA5	NA	1.55665e+07	2.03152e+07	NA	3.46691e+07	2.66149e+07
ACMNETR-HexNAc(2)Hex(8)	P42892	140986	NA	1.05772e+06	1.48762e+07	NA	2.89405e+06
EDPSPENR-HexNAc(1)Fuc(1)	Q01826	NA	9.34213e+06	NA	NA	908289	NA
RDPGAAVPGAANASAQQPR-HexNAc(2)Hex(7)	P28300	2.78593e+07	2.52619e+07	NA	3.07469e+07	2.06572e+07	NA
DHLLLPAISHNK-HexNAc(2)Hex(9)	Q99941	6.19294e+06	5.92002e+06	NA	7.24423e+06	5.11452e+06	NA
NITLR-HexNAc(6)Hex(7)Fuc(1)NeuAc(2)	Q9UHN6	NA	1.5638e+08	NA	NA	2.0213e+08	NA
PFNDSTHAEPLNDSTHISLQEENQSSVSHCVPDVSTITEEGLFSQK-HexNAc(6)Hex(5)Fuc(1)NeuAc(2)	Q92547	NA	NA	2.23792e+06	NA	NA	1.29447e+06
ENK-HexNAc(9)Hex(3)Fuc(1)	A0MZ66	NA	NA	4.34046e+06	NA	NA	4.93176e+06
NVTVK-HexNAc(2)Hex(9)	O75976	NA	NA	1.64122e+06	NA	NA	910023
MNR-HexNAc(2)Hex(9)	Q92598	2.24593e+06	NA	NA	1.99535e+06	NA	NA
KEENFSSPK-HexNAc(2)Hex(10)	Q96SB8	3.42106e+06	NA	NA	4.0314e+06	NA	NA
AAKNVSYK-HexNAc(4)Hex(5)Fuc(1)	O14647	NA	NA	1.38433e+07	NA	NA	7.16611e+07
KNASNMEYR-HexNAc(5)Hex(6)Fuc(1)NeuAc(3)	Q9Y639	5.06191e+07	NA	NA	1.47282e+07	NA	NA
EENK-HexNAc(2)Hex(8)	Q5SSJ5	NA	NA	3.11737e+06	NA	NA	3.41394e+06
LLAANR-HexNAc(2)Hex(4)	Q68CP9	NA	NA	1.60245e+06	NA	NA	193844
EEEPVFTRQDSNR-HexNAc(4)Hex(6)Fuc(1)NeuAc(1)0	Q9Y520	2.5643e+07	NA	NA	7783892	NA	NA
LNSSTIK-HexNAc(9)Hex(6)Fuc(1)	P13473	NA	2.85105e+06	NA	NA	2.18383e+07	NA
KEDALNETR-HexNAc(2)Hex(9)	P10909	NA	NA	2.10979e+07	NA	NA	8.98021e+06
KWGHNITEFQQR-HexNAc(2)Hex(8)	Q96HE7	4.73092e+06	6.89498e+06	NA	3.8531e+06	7.44504e+06	NA
EEEENLTRK-HexNAc(4)Hex(4)	P56277	NA	NA	4.92714e+06	NA	NA	2.6112e+06
LGQEGKVPLQSAHLYYNVTEK-HexNAc(9)Hex(10)Fuc(1)	Q32P28	5.97657e+06	NA	NA	2.96362e+07	NA	NA
EEQGKVYVYALNQTR-HexNAc(1)	P56199	1.2011e+06	NA	NA	996125	NA	NA
AAAAAAATAVDEESPFLVAVENGSAPSEPGLVCEPPQPEEEELREEEVADEEASQEWHAEAPGGGDR-HexNAc(2)Hex(1)	Q5TGJ6	NA	NA	21469133	NA	NA	704311
DYYLNK-HexNAc(2)Hex(8)	P42892	NA	NA	3.97876e+06	NA	NA	2.05301e+06
GHVNITR-HexNAc(2)Hex(7)	P00734	1.93337e+07	2.18117e+07	2.17653e+07	2.22388e+07	2.34726e+07	1.03332e+07
ADTHDEILEGLNFNLTEIPEAQIHEGFQELLR-HexNAc(2)Hex(9)	P01009	4.65305e+06	NA	NA	4.71231e+06	NA	NA
NNHTASILDR-HexNAc(5)Hex(6)Fuc(1)NeuAc(3)	P08962	731179854	817109602	419237476	1.78881e+08	199116015	1.02377e+08
MMNDSCQNLPK-HexNAc(2)Hex(8)	Q8IYT4	NA	1.99344e+06	875814	NA	1.56012e+08	6.8364e+07
ANHSGAVVLLK-HexNAc(5)Hex(6)NeuAc(2)	P23229	2.43703e+07	2.24681e+07	NA	3.35177e+07	3.01607e+07	NA
ENK-HexNAc(9)Hex(10)Fuc(1)	A0MZ66	3.54309e+06	NA	NA	3.26627e+06	NA	NA
GTNYTVR-HexNAc(2)Hex(1)	P07942	NA	NA	1.34168e+06	NA	NA	798060
NVTR-HexNAc(2)Hex(9)	P05556	1.07338e+08	1.37111e+08	NA	1.05992e+08	1.46379e+08	NA
IWHCESNR-HexNAc(2)Hex(8)	O15550	12691234	NA	NA	3.72135e+07	NA	NA
GPGIKPNQTSK-HexNAc(2)Hex(1)	P15586	NA	1.85618e+07	6.61911e+06	NA	21140803	6.7482e+06
NHTL-HexNAc(6)Hex(7)NeuAc(3)	Q8NBJ4	NA	2.2705e+06	NA	NA	10705471	NA
YHYNGSLMDGTLFDSSYSR-HexNAc(2)Hex(9)	Q96AY3	2.07116e+07	2.68399e+07	2.02203e+06	1.41575e+07	13650499	1.96725e+06
IYIPLNK-HexNAc(2)Hex(9)	Q92542	1.07757e+07	NA	NA	9.50072e+06	NA	NA
NK-HexNAc(2)Hex(4)	Q4KMQ2	NA	NA	2.47437e+06	NA	NA	848264
ANNSWFQSILR-HexNAc(2)Hex(9)	Q92542	1.0099e+07	9.62964e+06	NA	2.31157e+07	1.98787e+07	NA
FINYNQTVSR-HexNAc(2)Hex(8)	Q8N766	NA	9.61989e+06	NA	NA	2.44834e+07	NA
TLTNQTEAELATPEGIYERPVDYLPER-HexNAc(2)Hex(8)	O15460	NA	NA	3.3632e+06	NA	NA	1.89533e+06
SKPLDNASK-HexNAc(2)Hex(7)	O00186	NA	1.15345e+07	NA	NA	3.63212e+06	NA
EGNNLSR-HexNAc(2)Hex(7)	P25391	2.03924e+07	NA	NA	4.03065e+06	NA	NA
LKVPESENNK-HexNAc(2)Hex(8)	Q5JRA6	6.23909e+07	6.0468e+07	2.67613e+07	3.91025e+07	3.47122e+07	1.38156e+07
LLNINPNK-HexNAc(2)Hex(9)	P11279	NA	5.07724e+06	NA	NA	1.11934e+07	NA
LLNINPNK-HexNAc(2)Hex(1)	P11279	NA	10659609	NA	NA	1.189e+07	NA
DPAGIFELVEVVGNGTYGQVYK-HexNAc(6)Hex(5)Fuc(1)	O95819	NA	4.42803e+06	NA	NA	2.95624e+06	NA
HLYTTTGGETDFTNVTSLR-HexNAc(6)Hex(5)	Q99523	5.83889e+07	NA	NA	2.03785e+07	NA	NA
AENQTAPGEVPALSNLRPPSR-HexNAc(2)Hex(10)	P28300	5.03871e+07	NA	NA	2.08235e+07	NA	NA
NLEKNSTK-HexNAc(2)Hex(4)Fuc(1)	P07602	831538	935372	NA	870320	880130	NA
EEEENLTR-HexNAc(2)Hex(8)	P56277	NA	NA	1.2534e+06	NA	NA	987743
VSNVSCQASVSR-HexNAc(2)Hex(9)	P55058	1.39127e+07	1.37748e+07	NA	1.9818e+07	2.13668e+07	NA
DHCLLCRNHTK-HexNAc(2)Hex(8)	Q7Z7M0	1.47218e+07	NA	NA	10920709	NA	NA
KNSTTNYR-HexNAc(2)Hex(9)	A0JNW5	NA	1.3326e+07	NA	NA	2.34179e+07	NA
EEEELAYDWSDNNSNISAK-HexNAc(9)Hex(1)	Q9UPN3	NA	3.70964e+06	NA	NA	3.51631e+06	NA
ENK-HexNAc(9)Hex(4)	A0MZ66	NA	NA	8.53844e+06	NA	NA	2.65392e+06
NISFMVKR-HexNAc(7)Hex(8)Fuc(1)NeuAc(2)	O14672	NA	NA	1.39957e+06	NA	NA	2.04338e+06
YPQDYQFYIQNFTALPLNTVVPPQR-HexNAc(2)Hex(9)	P43307	NA	5.58085e+06	NA	NA	5.60354e+06	NA
QQQHLFGSNVTDCSGNFCLFR-HexNAc(2)Hex(8)	P02787	4.9648e+06	4.89102e+06	NA	3.41994e+06	7.79938e+06	NA
NGVNGTGENGR-HexNAc(2)Hex(9)	P05556	2.18562e+06	NA	NA	4.12556e+06	NA	NA
TANHSAPSLENSVQPGK-HexNAc(2)Hex(6)	Q9UJ14	NA	NA	5.23379e+06	NA	NA	2.74137e+06
PQTNK-HexNAc(9)Hex(9)Fuc(1)	Q14157	NA	NA	5.8807e+06	NA	NA	5.05271e+06
LNSSTIK-HexNAc(6)Hex(7)NeuAc(1)	P13473	2.19069e+08	3.27175e+08	1.70486e+08	2.05718e+08	2.99869e+08	1.61393e+08
LLNINPNK-HexNAc(6)Hex(8)NeuAc(1)0	P11279	1.21306e+08	NA	NA	1.70823e+07	NA	NA
DVNCSVMGPQEK-HexNAc(2)Hex(9)	P53634	6.25123e+06	NA	NA	1.75079e+06	NA	NA
NLTLR-HexNAc(2)Hex(1)	P05362	NA	2.60884e+07	NA	NA	1.74379e+07	NA
EMEMLWNK-HexNAc(2)Hex(8)	A0A1B0GTZ2	NA	NA	1.85407e+06	NA	NA	2.00005e+07
DHVHCLGNR-HexNAc(2)Hex(8)	Q9BRN9	2.10018e+07	2.10418e+07	NA	6.94331e+07	7.00251e+07	NA
NASEMIDK-HexNAc(2)Hex(9)	P36542	2.96308e+06	NA	588910	2.61785e+08	NA	2.504e+07
RDHHGANFSCRTELDLRPQGLELFENTSAPYQLQTFVLPATPPQLVSPR-HexNAc(5)Hex(3)Fuc(1)	P05362	7.43542e+06	NA	NA	4.24881e+06	NA	NA
AAAQQRKILLEGSDGDSANDTEPDFAPGEDSEDDSDFCESEDNDEDFSMR-HexNAc(2)Hex(1)	Q96B01	NA	NA	1.95361e+06	NA	NA	3.28941e+07
ENK-HexNAc(6)Hex(4)NeuAc(1)	A0MZ66	NA	NA	5.44106e+06	NA	NA	628285
NR-HexNAc(6)Hex(5)Fuc(1)NeuAc(3)	Q4KMQ2	NA	NA	1.93884e+06	NA	NA	3.99001e+06
IPFQNNNSLGFK-HexNAc(2)Hex(9)	Q7Z443	NA	NA	5.16331e+06	NA	NA	5.16331e+06
AQAVETNK-HexNAc(2)Hex(6)	P11150	1.00055e+06	825472	NA	250326	199451	NA
DLGPTLANSTHHNVR-HexNAc(2)Hex(7)	P04062	6.0095e+06	NA	NA	6.59625e+06	NA	NA
EEEPVFTRQDSNR-HexNAc(2)Hex(3)Fuc(1)	Q9Y520	NA	4.28262e+06	NA	NA	7.42306e+06	NA
DNDSLAAR-HexNAc(2)Hex(9)	P54886	NA	1.0637e+07	NA	NA	3.40693e+06	NA
FINYNQTVSR-HexNAc(2)Hex(9)	Q8N766	3.75313e+07	2.64186e+07	2.78444e+07	6.71269e+07	5.58844e+07	4.77102e+07
AENQTAPGEVPALSNLRPPSR-HexNAc(2)Hex(9)	P28300	62284245	8.20597e+07	3.42652e+07	3.61432e+07	5.19397e+07	2.64468e+07
NVSHDR-HexNAc(4)Hex(5)	Q86UQ4	5.7045e+07	NA	NA	1.76564e+07	NA	NA
VNFTEIQK-HexNAc(2)Hex(8)	P02771	8.00455e+06	1.6684e+07	NA	6.88128e+06	8.30941e+06	NA
TCHESYNR-HexNAc(4)Hex(5)Fuc(1)NeuAc(2)	P33908	6.39863e+07	6.50546e+07	NA	7.45164e+06	7.38221e+06	NA
KEENFSSPK-HexNAc(2)Hex(8)	Q96SB8	3.33793e+06	NA	NA	4.90026e+07	NA	NA
EEEELAYDWSDNNSNISAK-HexNAc(9)Hex(4),HexNAc(7)Hex(3)	Q9UPN3	NA	NA	266520019	NA	NA	311465704
IAPASNVSHTVVLRPLK-HexNAc(6)Hex(4)	P43308	505095470	1528256221	1.03764e+08	1305815477	1437688847	7.97667e+07
VASVININPNTTHSTGSCR-HexNAc(6)Hex(7)Fuc(1)NeuAc(3)	P13473	1.91543e+07	NA	1.06281e+07	7.43392e+07	NA	4.52771e+07
QGKRPSPLSENVSELK-HexNAc(2)Hex(1)	Q99618	NA	NA	478517	NA	NA	1.73739e+07
YHYNGTLLDGTSFDTSYSK-HexNAc(4)Hex(6)	Q96AY3	NA	436582	NA	NA	4.53025e+07	NA
NASNMEYRINK-HexNAc(2)Hex(8)	Q9Y639	NA	NA	8.49376e+06	NA	NA	4.9821e+06
NNHTASILDR-HexNAc(6)Hex(7)NeuAc(3)	P08962	NA	5.92918e+06	NA	NA	3.53449e+06	NA
QKDLDNFTSK-HexNAc(2)Hex(6)	Q8NF91	NA	NA	7.79745e+06	NA	NA	1.08505e+06
YQLGTSPYVYQLTTRPVTDGQPHSINITR-HexNAc(6)Hex(4)	P78357	NA	3.95792e+07	NA	NA	2.1379e+07	NA
KQPSPTPGNATGGPLPVSAASQAHQASHQPLYLNHP-HexNAc(6)Hex(3)	Q99941	NA	5.41731e+07	NA	NA	4.2912e+07	NA
RPNQSQPLPPSSLQR-HexNAc(6)Hex(4)	Q92542	5.50125e+07	NA	NA	5.00393e+07	NA	NA
LVALAVIDEKNTSVEHTR-HexNAc(2)Hex(9)	Q96JJ7	NA	3.28792e+06	NA	NA	2.25881e+06	NA
NYTADYDK-HexNAc(3)Hex(4)Fuc(1)NeuAc(1)	O75477	6.89243e+06	NA	NA	5.26631e+06	NA	NA
EPNFTLK-HexNAc(2)Hex(5)	Q92545	NA	2.86047e+06	NA	NA	2.22851e+06	NA
KIQQESLGSAPLMGDDHPNASR-HexNAc(2)Hex(6)	Q5JRA6	NA	6.17283e+06	NA	NA	3224741	NA
YHYNGTFEDGKK-HexNAc(2)Hex(8)	Q96AY3	7.67435e+07	8.86876e+07	5.8836e+07	4.31786e+07	4.19852e+07	3.59351e+07
GNITEYQCHQYITK-HexNAc(4)Hex(5)Fuc(1)NeuAc(2)	Q92896	4.13006e+07	5.77177e+07	2.80831e+07	1.81093e+07	21172862	12537514
ENK-HexNAc(8)Hex(3)	A0MZ66	2.41278e+07	NA	NA	4.73201e+07	NA	NA
LLNINPNK-HexNAc(6)Hex(7)NeuAc(1)0	P11279	4.65469e+07	NA	NA	2.45182e+07	NA	NA
GSPEPNITWDK-HexNAc(2)Hex(9)	Q8NDA2	1.38738e+08	NA	NA	9.56317e+07	NA	NA
WKGCIHDNR-HexNAc(2)Hex(9)	Q8WXD9	NA	NA	4.93381e+07	NA	NA	3.98988e+07
LENITTGTYTIHAQKEHLYFETVTIKIAPNTPQLADIIATGFSVCGQISIIR-HexNAc(2)	Q15155	NA	NA	3.94824e+07	NA	NA	1.86363e+06
FTFTSHTPGDHQICLHSNSTR-HexNAc(2)Hex(8)	Q7Z7H5	9.43545e+06	NA	NA	1.04081e+07	NA	NA
AANGSLR-HexNAc(2)Hex(8)	P11279	NA	2.20711e+08	9.25072e+06	NA	2.17014e+08	6.32519e+06
NR-HexNAc(5)Hex(6)Fuc(1)NeuAc(2)	Q4KMQ2	NA	NA	1.67577e+06	NA	NA	239768
HLNSSHPR-HexNAc(2)Hex(8)	Q5JTV8	1.76676e+07	2.37632e+07	NA	1.77622e+07	2.37632e+07	NA
EAGPEPPPPLSVYHNGTGTVR-HexNAc(8)Hex(9)	Q8WXD9	NA	NA	2.64266e+07	NA	NA	1.45788e+06
LISNCSK-HexNAc(2)Hex(1)	P05156	NA	1.38339e+07	6.33644e+06	NA	1.25211e+07	5.55739e+06
TALWVATDHNMDNTSTVLR-HexNAc(2)Hex(9)	Q8NBJ5	2.24718e+07	1.53478e+07	NA	9.69745e+06	1.18683e+07	NA
RRDPGAAVPGAANASAQQPR-HexNAc(2)Hex(9)	P28300	1.18499e+07	1.4135e+07	6.46955e+06	6.9224e+06	7023230	2.46878e+06
NVTHHVSVTK-HexNAc(2)Hex(7)	O94901	1.12679e+08	NA	NA	7.36155e+07	NA	NA
ENVGIYNLSK-HexNAc(2)	Q15155	NA	NA	3.20117e+06	NA	NA	477101
VASVININPNTTHSTGSCR-HexNAc(9)Hex(6)	P13473	1.38503e+06	NA	NA	3.9976e+07	NA	NA
GHTLTLNFTR-HexNAc(2)Hex(9)	P11279	NA	2.71467e+07	1.56014e+07	NA	3.81779e+07	1.56599e+07
EEDAGEWITVNQTTTANRYLKVSDLQQGK-HexNAc(2)Hex(2)Fuc(1)	P54296	NA	NA	4.20589e+06	NA	NA	3.29912e+06
KEENFSSPK-HexNAc(6)Hex(9)Fuc(1)NeuAc(2)	Q96SB8	1.58779e+07	NA	NA	6.23104e+07	NA	NA
TVNSNCEINNR-HexNAc(2)Hex(9)	Q15154	NA	4.19833e+07	NA	NA	3.02293e+07	NA
NKSK-HexNAc(6)Hex(3)Fuc(1)	Q4KMQ2	NA	3.78457e+06	NA	NA	1.89649e+06	NA
ENK-HexNAc(6)Hex(4)	A0MZ66	6.21173e+06	6.65251e+06	NA	2.1573e+06	2983497	NA
TVLTPATNHMGNVTFTIPANR-HexNAc(6)Hex(4)	P01024	51668332	6.64572e+07	NA	4.41716e+07	6.71448e+07	NA
KNLTLMATTSQLPK-HexNAc(2)Hex(9)	P11117	3.37203e+06	NA	NA	8.95421e+06	NA	NA
NWSLSQVNVSHAR-HexNAc(2)Hex(6)	P55291	NA	NA	2.53838e+07	NA	NA	2.53838e+07
YQNNSPPNNDDQWK-HexNAc(2)Hex(7)	O75841	2.60906e+07	NA	1.39993e+07	1.96722e+07	NA	7508995
YHVLHINTTK-HexNAc(3)Hex(5)NeuAc(1)	Q7LGA3	7.19007e+06	7.81496e+06	1.47664e+06	3.583e+06	3.51575e+06	1.36638e+06
NVTHHVSVTK-HexNAc(2)Hex(6)	O94901	5.11633e+07	8.51515e+07	1.9396e+07	5.58511e+07	7.1803e+07	2.23065e+07
DHHGANFSCR-HexNAc(6)Hex(7)Fuc(1)NeuAc(1)	P05362	NA	2.20468e+07	NA	NA	7.67713e+06	NA
IPFQNNNSLGFK-HexNAc(2)Hex(7)	Q7Z443	NA	NA	2.17776e+07	NA	NA	2.17776e+07
DPGAAVPGAANASAQQPR-HexNAc(6)Hex(5)	P28300	1.74764e+07	NA	NA	4.27456e+07	NA	NA
KLNYTLSQGHR-HexNAc(4)Hex(5)NeuAc(2)	P15144	3.41496e+07	3.62149e+07	1.62313e+07	4.19451e+07	38447439	1.81303e+07
NR-HexNAc(9)Hex(3)Fuc(1)	Q4KMQ2	NA	NA	1.86503e+06	NA	NA	8.93455e+06
NFTMNEK-HexNAc(2)Hex(1)	Q92820	NA	1.72143e+06	NA	NA	9.55265e+06	NA
LKCQENTSK-HexNAc(2)Hex(6)	Q96KX1	NA	NA	6.43683e+06	NA	NA	4.82015e+07
NK-HexNAc(3)Hex(6)Fuc(1)NeuAc(1)	Q4KMQ2	NA	NA	781216	NA	NA	2.66516e+06
IYIPLNK-HexNAc(2)Hex(8)	Q92542	NA	NA	6.8589e+06	NA	NA	2.9019e+06
EDFRLHFRNISR-HexNAc(1)Hex(1)Fuc(1)	Q96HE7	NA	NA	2.07589e+07	NA	NA	1.97563e+07
ETIQPFMNK-HexNAc(2)Hex(6)	Q9Y227	1.81203e+07	NA	NA	102710851	NA	NA
LISNCSK-HexNAc(2)Hex(9)	P05156	1.09765e+07	1.11793e+07	NA	1.32288e+07	1.36982e+07	NA
EENK-HexNAc(9)Hex(6)	Q5SSJ5	NA	NA	2.98035e+06	NA	NA	1.56781e+06
LANNTHQHVFDDLR-HexNAc(4)Hex(5)Fuc(1)NeuAc(2)	Q99523	24075635	1.99265e+07	8.54166e+06	1.08644e+06	3.13326e+06	735670
IAPASNVSHTVVLRPLK-HexNAc(2)Hex(1)	P43308	NA	3.85604e+06	14757024	NA	9.00237e+06	3.69257e+07
YHVLHINTTK-HexNAc(3)Hex(6)NeuAc(1)	Q7LGA3	6.00735e+07	4.9899e+07	1.45231e+07	4.55018e+07	4.15584e+07	1.20759e+07
PVHHFMNTSTFTEYTVVDESSVAK-HexNAc(2)Hex(8)	P40394	NA	19435194	NA	NA	1.27528e+08	NA
GSPEPNITWDK-HexNAc(2)Hex(7)	Q8NDA2	2.14441e+07	NA	NA	2.50202e+07	NA	NA
AVNK-HexNAc(3)Hex(4)	Q8TB92	NA	1.85718e+06	NA	NA	2.80003e+06	NA
QQKNK-HexNAc(5)Hex(5)Fuc(1)NeuAc(1)	Q8IWJ2	NA	2.88712e+06	NA	NA	1.00838e+06	NA
EEEENLTR-HexNAc(3)Hex(4)	P56277	NA	NA	3.66041e+06	NA	NA	924500
NVTWK-HexNAc(7)Hex(8)Fuc(1)NeuAc(2)	P50454	NA	NA	791939	NA	NA	5.58924e+06
KEDALNETR-HexNAc(2)Hex(10)	P10909	9.50916e+06	NA	NA	5.35797e+06	NA	NA
KEDALNETR-HexNAc(2)Hex(10)	P10909	NA	NA	10601058	NA	NA	5.01543e+06
DYYLNK-HexNAc(5)Hex(6)Fuc(1)NeuAc(2)	P42892	NA	1.14076e+07	NA	NA	5860381	NA
GKDLDTDFTNNASQPETK-HexNAc(2)Hex(1)	O75976	NA	4.04808e+06	NA	NA	460414	NA
LLNINPNK-HexNAc(6)Hex(7)Fuc(1)NeuAc(1)	P11279	1.47067e+08	2.56238e+08	1.27015e+08	2.26708e+08	350666059	1.68025e+08
GPGIKPNQTSK-HexNAc(2)Hex(7)	P15586	2.87001e+08	1.68979e+07	7.1034e+06	3.46302e+08	1.68979e+07	7.1034e+06
KCSNISIGDEVQFEISITSNK-HexNAc(2)Hex(9)	P05556	NA	NA	1.91316e+06	NA	NA	1.70462e+06
EPNFTLK-HexNAc(3)Hex(6)	Q92545	NA	8746214	NA	NA	9.37171e+06	NA
NHTL-HexNAc(2)Hex(9)	Q8NBJ4	NA	4.47984e+06	NA	NA	2.96422e+06	NA
YETTNK-HexNAc(2)Hex(9)	P13473	3.99922e+06	4.10115e+06	NA	2.92838e+06	2.83927e+06	NA
NNHTASILDR-HexNAc(6)Hex(6)Fuc(1)NeuAc(3)	P08962	3.83334e+07	4.62658e+07	2.18841e+07	1.6401e+07	20671837	8.63251e+06
MTGLGGRPEVVLEGSYDGHHWTEIEFMYKPGNLSRPPPVVVPHQPR-HexNAc(2)Hex(9)	Q9BU23	3.8853e+06	6.8902e+06	2072883	2007020	3.23742e+06	1.3852e+06
FVEGSHNSTVSLTTK-HexNAc(2)Hex(1)	P04114	NA	2.35491e+07	NA	NA	1.68952e+07	NA
EEDAGEWITVNQTTTANR-HexNAc(3)Hex(6)NeuAc(1)	P54296	NA	NA	5.61019e+07	NA	NA	1.64278e+07
NK-HexNAc(9)Hex(4)	Q4KMQ2	NA	NA	6.60092e+06	NA	NA	1.17886e+06
SLSNSTAR-HexNAc(2)Hex(9)	P50454	2.58947e+08	3.28647e+08	1.31376e+08	3.31625e+08	3.98054e+08	1.65778e+08
NQNESVSEIGGK-HexNAc(2)Hex(8)	Q68CR1	NA	1.89642e+07	NA	NA	8.61593e+06	NA
RNQSLSLLYK-HexNAc(2)Hex(9)	Q06481	2.89352e+07	NA	NA	7.2806e+07	NA	NA
FVNDTK-HexNAc(2)Hex(8)	P78536	1.39681e+07	1.51787e+07	NA	1.16855e+07	1.42106e+07	NA
INTTADEKDPTNPFR-HexNAc(2)Hex(10)	O14672	5.34214e+07	NA	NA	6277960	NA	NA
MTGLGGRPEVVLEGSYDGHHWTEIEFMYKPGNLSRPPPVVVPHQPR-HexNAc(2)Hex(8)	Q9BU23	710049	NA	NA	3.93265e+06	NA	NA
ENK-HexNAc(2)Hex(3)Fuc(1)	A0MZ66	2.80348e+06	NA	4.83511e+06	3.10525e+06	NA	2.77729e+06
EENK-HexNAc(3)Hex(5)	Q5SSJ5	NA	NA	652238	NA	NA	768682
RGDDLYTNVTISLVESLVGFEMDITHLDGHK-HexNAc(6)Hex(4)	Q9UBS4	1.96656e+07	1.7953e+07	NA	1.31478e+07	2.22571e+07	NA
YHYNGTFEDGK-HexNAc(2)Hex(9)	Q96AY3	1.62024e+07	14751455	4.64491e+06	9.85604e+06	9377396	5.34392e+06
MTGLGGRPEVVLEGSYDGHHWTEIEFMYKPGNLSRPPPVVVPHQPR-HexNAc(5)Hex(6)NeuAc(3)	Q9BU23	NA	1.18026e+06	NA	NA	1.11749e+06	NA
NISNLQYK-HexNAc(9)Hex(10)Fuc(1)	O76041	2.08424e+07	NA	NA	1.69442e+07	NA	NA
QADEDIQGTQNLLTSIESETAASEETLFNASQR-HexNAc(6)Hex(7)	P07942	NA	NA	1.94416e+07	NA	NA	6.16041e+06
LANLTQGEDQYYLR-HexNAc(2)Hex(9)	P10909	1.01139e+07	1.22981e+07	NA	6.55731e+06	6.82534e+06	NA
NISGHIYNQNVSQK-HexNAc(2)Hex(6)	Q9P0T7	NA	NA	8.44924e+06	NA	NA	1.11685e+07
HLNSSHPR-HexNAc(2)Hex(9)	Q5JTV8	1.09179e+07	1.15481e+07	NA	1.48979e+07	1.48203e+07	NA
SLECLHPGTKFLNNGTCTAEGK-HexNAc(2)Hex(7)	P05156	1.2697e+07	NA	NA	8.80278e+06	NA	NA
KFNSTQIAAMAPEHEEPR-HexNAc(2)Hex(9)	Q4G148	1.89841e+07	3.48738e+07	2.08183e+07	1.16784e+07	1.3478e+07	1.16593e+07
LLSTANYNTSHYNNDLWQIFENPVDWK-HexNAc(2)Hex(9)	O00469	NA	6.16652e+06	4893077	NA	4.86257e+06	6040384
YHYNGTFEDGKK-HexNAc(9)Hex(4)Fuc(1)	Q96AY3	NA	2.00642e+06	NA	NA	4.99496e+07	NA
ANISHK-HexNAc(2)Hex(1)	P01031	NA	9.94339e+06	NA	NA	7.9134e+06	NA
GNPYSDLGNHTTCR-HexNAc(2)Hex(8)	Q4KMQ2	NA	7.82355e+06	NA	NA	7.39406e+06	NA
RNWTITR-HexNAc(2)Hex(8)	P19022	1.96182e+07	3.88837e+07	6.49816e+07	1.96182e+07	3.15532e+07	6.81218e+07
YNCSIESPR-HexNAc(2)Hex(8)	O00469	4.39622e+07	6.70618e+07	1.35335e+07	4.73764e+07	5.81762e+07	1.48088e+07
ANTTQPGIVEGGQVLK-HexNAc(2)Hex(8)	P06756	5.57137e+07	7.39083e+07	NA	2.6171e+07	2.67682e+07	NA
DVNCSVMGPQEK-HexNAc(2)Hex(6)	P53634	NA	NA	1.63694e+06	NA	NA	1.38185e+06
HLNSSHPR-HexNAc(2)Hex(7)	Q5JTV8	3.45336e+07	6.21931e+07	NA	3.33621e+07	6.53733e+07	NA
DNNNSNNRGSYNRAPQQQPPPQQPPPPQPPPQQPPPPPSYSPAR-HexNAc(6)Hex(3)Fuc(1)	Q9BUJ2	NA	NA	5.52122e+06	NA	NA	605375
VVNSTTGPGEHLR-HexNAc(2)Hex(8)	P07996	1.76771e+07	2.06002e+07	7.59567e+06	9.77037e+06	7.00828e+06	3.91045e+06
DPAGIFELVEVVGNGTYGQVYK-HexNAc(4)Hex(7)	O95819	NA	4.26523e+06	NA	NA	1.14299e+07	NA
GHTLTLNFTR-HexNAc(4)Hex(6)NeuAc(1)0	P11279	3.62127e+07	NA	NA	39048471	NA	NA
QPHGGQQKPSYGSGYQSHQGQQQSYNQSPYSNYGPPQGKQK-HexNAc(5)Hex(3)Fuc(1)	Q12906	NA	8607976	NA	NA	64970954	NA
DLGPTLANSTHHNVR-HexNAc(2)Hex(8)	P04062	2.23871e+07	1.45465e+07	7.97516e+06	2.00559e+07	1.59531e+07	5.93789e+06
RPNQSQPLPPSSLQR-HexNAc(2)Hex(6)	Q92542	NA	NA	5.27951e+06	NA	NA	1.11786e+07
VIVTSKHNNDTQHIWESDSNEFSVIADPR-HexNAc(6)Hex(8)NeuAc(1)	P14625	NA	NA	442734	NA	NA	792747
EAGPEPPPPLSVYHNGTGTVR-HexNAc(2)Hex(3)Fuc(1)	Q8WXD9	NA	NA	1.00627e+06	NA	NA	1.30544e+06
FLRARNISGVVLADHSGAFHNK-HexNAc(4)Hex(5)NeuAc(1)	Q92542	NA	NA	9.53415e+06	NA	NA	9.59679e+06
NR-HexNAc(6)Hex(6)Fuc(1)NeuAc(2)	Q4KMQ2	NA	NA	1.20542e+06	NA	NA	1.20542e+06
NQTLAGEYFHK-HexNAc(2)Hex(9)	Q68CR1	NA	25128687	1.41618e+07	NA	1.56073e+07	8.85473e+06
TVLTPATNHMGNVTFTIPANR-HexNAc(2)Hex(9)	P01024	NA	30563320	NA	NA	6.65993e+07	NA
NNSNNFDLNR-HexNAc(4)Hex(5)NeuAc(2)	O75976	NA	6.33195e+07	5.35796e+07	NA	1.08094e+07	6.03823e+06
KFGVFNYSPFR-HexNAc(2)Hex(8)	Q9ULU4	NA	1.44527e+07	5.15587e+06	NA	1.44527e+07	5.15587e+06
QAVGGAGPPNPAINGSAPRDLFDMK-HexNAc(6)Hex(7)Fuc(1)NeuAc(2)	P29353	NA	NA	1.08587e+06	NA	NA	1.27805e+07
NK-HexNAc(5)Hex(5)Fuc(1)	Q4KMQ2	NA	NA	744830	NA	NA	1.08248e+07
YHYNCSLLDGTQLFTSHDYGAPQEATLGANK-HexNAc(2)Hex(7)	Q96AY3	1.61547e+07	1.55716e+07	7418460	1.14832e+07	7.78302e+06	6.0481e+06
SSCGKENTSDPSLVIAFGR-HexNAc(4)Hex(5)Fuc(1)NeuAc(1)	P11279	NA	1.3493e+07	NA	NA	2.07257e+06	NA
DPAGIFELVEVVGNGTYGQVYK-HexNAc(2)Hex(5)Fuc(1)	O95819	4.39727e+06	NA	NA	4.56355e+06	NA	NA
NVTWK-HexNAc(6)Hex(6)Fuc(1)NeuAc(1)	P50454	NA	2.5889e+06	NA	NA	1.15483e+06	NA
YHYNCSLLDGTQLFTSHDYGAPQEATLGANK-HexNAc(2)Hex(6)	Q96AY3	3.05451e+06	NA	NA	3.29905e+06	NA	NA
GPSIWDHFIHTHLKNVSSTNGSSDSYIFLEK-HexNAc(2)Hex(9)	Q86Z14	4.1001e+06	NA	NA	3.81427e+06	NA	NA
GASNLTWR-HexNAc(2)Hex(10)	P15586	8.54597e+06	NA	NA	2.01698e+06	NA	NA
QDNETGIYYETWNVK-HexNAc(2)Hex(9)	O75503	NA	1.32228e+07	NA	NA	9.1075e+06	NA
EVQMGDFVRYHYNGTFEDGK-HexNAc(5)Hex(6)Fuc(1)NeuAc(3)	Q96AY3	NA	2.44724e+07	NA	NA	1679984	NA
EEEELAYDWSDNNSNISAK-HexNAc(4)Hex(6)NeuAc(1)	Q9UPN3	NA	NA	13865343	NA	NA	1.38862e+07
NHTL-HexNAc(2)Hex(7)	Q8NBJ4	NA	2.5853e+06	NA	NA	1.14815e+06	NA
NR-HexNAc(5)Hex(5)Fuc(1)NeuAc(1)	Q4KMQ2	NA	NA	2.01016e+06	NA	NA	3.72827e+06
SGNDTYGAAHNLLVAHALAWR-HexNAc(2)Hex(10)	Q86Z14	7.86209e+06	NA	NA	1.21e+07	NA	NA
LNSSTIK-HexNAc(6)Hex(7)Fuc(1)NeuAc(1)	P13473	NA	5.16081e+07	NA	NA	4.93946e+07	NA
NVTR-HexNAc(2)Hex(8)	P05556	NA	4.29003e+07	NA	NA	3.84587e+07	NA
VTNSNANAASPLIVAGYNVSGSVR-HexNAc(6)Hex(4)	P69849	NA	1.13623e+08	NA	NA	1.14465e+08	NA
HLYTTTGGETDFTNVTSLR-HexNAc(2)Hex(10)	Q99523	3.58039e+07	NA	NA	1.15737e+07	NA	NA
EEEPVFTRQDSNR-HexNAc(4)Hex(5)	Q9Y520	43869998	NA	NA	3.00053e+07	NA	NA
NNHTASILDR-HexNAc(5)Hex(6)Fuc(1)NeuAc(2)	P08962	4.86499e+07	3.49736e+07	2.65914e+07	1.14167e+08	1.04468e+08	5.79062e+07
AANGSLR-HexNAc(2)Hex(9)	P11279	5.04414e+08	5.407e+08	NA	5.64542e+08	5.93461e+08	NA
RYNNGTWYK-HexNAc(2)Hex(9)	P25391	1.30246e+07	NA	NA	2.05945e+07	NA	NA
TPEFHPNK-HexNAc(2)Hex(10)	Q96S16	7.33389e+06	NA	NA	1.22352e+07	NA	NA
NNHTASILDR-HexNAc(2)Hex(1)	P08962	NA	6.07806e+07	2.31469e+07	NA	28731602	1.40041e+07
EEEELAYDWSDNNSNISAK-HexNAc(9)Hex(4),HexNAc(6)Hex(4)	Q9UPN3	NA	NA	649554	NA	NA	3.79599e+06
PILNSTSTLHR-HexNAc(2)Hex(8)	Q6UWU2	9.59145e+06	NA	NA	5.85128e+06	NA	NA
VQPFNVTQGK-HexNAc(6)Hex(7)NeuAc(2)	P13473	NA	14886248	NA	NA	2.88691e+07	NA
EENK-HexNAc(9)Hex(3)Fuc(1)	Q5SSJ5	NA	NA	1.54994e+06	NA	NA	9.77889e+06
EENK-HexNAc(7)Hex(8)Fuc(1)NeuAc(2)	Q5SSJ5	NA	9.55926e+06	NA	NA	1.55745e+06	NA
EEENGTNTADHVRNSSWAK-HexNAc(7)Hex(6)Fuc(1)NeuAc(4)	Q6GYQ0	NA	NA	1.80475e+07	NA	NA	12805741
GNVTQHVQGHR-HexNAc(5)Hex(6)Fuc(1)NeuAc(2)	Q15043	1.70037e+07	149203932	3.83162e+07	4.42051e+07	207424426	5.78065e+07
GKDLDTDFTNNASQPETK-HexNAc(5)Hex(6)Fuc(1)NeuAc(3)	O75976	NA	2.07755e+07	NA	NA	1.81335e+06	NA
KNNTYLVK-HexNAc(4)Hex(5)Fuc(1)NeuAc(2)	Q6P4E1	NA	5.47617e+07	2.58821e+07	NA	7.87205e+07	3.29416e+07
ANTTQPGIVEGGQVLK-HexNAc(2)Hex(9)	P06756	7.88915e+06	1.0624e+07	4829590	9.13341e+06	1.86649e+07	9.00416e+06
YHYNGTLLDGTSFDTSYSK-HexNAc(2)Hex(7)	Q96AY3	NA	4.89748e+06	NA	NA	9.40076e+06	NA
LKCQENTSK-HexNAc(2)Hex(5)	Q96KX1	NA	326852	41628.9	NA	9.61041e+06	4.81346e+06
DHPNATVWR-HexNAc(2)Hex(10)	Q9UMR5	1.08971e+07	NA	NA	8.89347e+06	NA	NA
YHYNGTFEDGKK-HexNAc(2)Hex(7)	Q96AY3	3.98853e+07	4.33803e+07	1.42993e+07	2.17925e+07	2.62195e+07	8.08553e+06
TTLVDNNTWNNSHIALVGK-HexNAc(2)Hex(1)	Q8TCJ2	NA	5.87287e+07	1.79347e+07	NA	4.87897e+07	2.26499e+07
SSCGKENTSDPSLVIAFGR-HexNAc(6)Hex(7)NeuAc(2)	P11279	NA	9.44821e+06	NA	NA	4.89935e+06	NA
DQPGHPVNR-HexNAc(2)Hex(8)	Q16880	7.89241e+06	NA	NA	4.13796e+06	NA	NA
VAAANVSVTQPESTGDPNNMTLLAEEAR-HexNAc(8)Hex(9)	P11047	NA	NA	7.65308e+06	NA	NA	1.77304e+06
DSPVLPVTLQCNLTSSSHTLTYSYWTK-HexNAc(4)Hex(3)	Q9Y639	NA	NA	293226690	NA	NA	7.62449e+07
EDPSPENRTLWENLSMIR-HexNAc(2)Hex(4)Fuc(1)	Q01826	NA	2.85207e+06	NA	NA	494522	NA
TTLVDNNTWNNSHIALVGK-HexNAc(2)Hex(8)	Q8TCJ2	1.31018e+08	1.21876e+08	7.4082e+07	1.11962e+08	9.65928e+07	5.7976e+07
IPFQNNNSLGFK-HexNAc(2)Hex(6)	Q7Z443	NA	NA	9.31972e+06	NA	NA	9.31972e+06
EPNFTLK-HexNAc(6)Hex(6)Fuc(1)	Q92545	NA	1.98595e+06	NA	NA	1.81406e+06	NA
FNSSYLQGTNQITGR-HexNAc(2)Hex(9)	P04114	7.62601e+07	1.27006e+08	46140297	7.00377e+07	9.13752e+07	4.18371e+07
AANGSLR-HexNAc(5)Hex(4)Fuc(1)	P11279	NA	NA	7.5574e+06	NA	NA	2.06873e+06
DHLLLPATTHNK-HexNAc(2)Hex(1)	P18850	NA	3.13867e+06	7.66067e+06	NA	3.58123e+06	1.74617e+06
GHTLTLNFTR-HexNAc(3)Hex(6)NeuAc(1)0	P11279	8.26242e+07	NA	NA	6.65481e+07	NA	NA
MNK-HexNAc(2)Hex(8)	P01024	2.79945e+06	3.27394e+06	NA	2.33663e+06	2.69363e+06	NA
PNQTSK-HexNAc(4)Hex(4)Fuc(1)NeuAc(1)	P15586	NA	2.11457e+07	9.82719e+06	NA	9.73869e+07	4.0655e+07
LLNINPNK-HexNAc(6)Hex(7)Fuc(1)NeuAc(3)	P11279	1.24293e+07	1.84171e+07	NA	2.36568e+07	4.30383e+07	NA
TTLVDNNTWNNSHIALVGK-HexNAc(2)Hex(7),HexNAc(5)Hex(3)Fuc(1)	Q8TCJ2	2.40282e+06	NA	NA	2.71008e+06	NA	NA
EENK-HexNAc(3)Hex(4)NeuAc(1)	Q5SSJ5	NA	NA	2.55128e+07	NA	NA	1.722e+06
GNITEYQCHQYITK-HexNAc(2)Hex(8)	Q92896	NA	9.73538e+06	NA	NA	1.69817e+06	NA
AMSSNETAAYK-HexNAc(2)Hex(1)	Q8TCJ2	NA	1.65028e+07	NA	NA	1.03259e+07	NA
VDGQLVNLTLVEGR-HexNAc(2)Hex(9)	P78357	NA	NA	1.80242e+07	NA	NA	893692
QGKRPSPLSENVSELK-HexNAc(2)Hex(9)	Q99618	NA	NA	660488828	NA	NA	6.78226e+08
NWTITR-HexNAc(2)Hex(8)	P19022	4.45977e+07	5.89153e+07	2.63678e+07	4.01117e+07	4.94994e+07	2.14045e+07
ANTTQPGIVEGGQVLK-HexNAc(4)Hex(6)NeuAc(1)	P06756	NA	NA	3.83847e+06	NA	NA	1.8567e+06
NYSDTPPTSK-HexNAc(2)Hex(8)	Q9GZX9	NA	2.41279e+07	NA	NA	9.53427e+06	NA
GNVTQHVQGHR-HexNAc(4)Hex(7)	Q15043	1.11029e+07	NA	NA	1.19455e+07	NA	NA
DHPNATVWR-HexNAc(2)Hex(8)	Q9UMR5	24628.9	NA	NA	983961	NA	NA
LIDNNK-HexNAc(2)Hex(8)	P07602	3.20374e+06	4.15582e+06	NA	2.39177e+06	2.18175e+06	NA
NHSIFLADINQER-HexNAc(2)Hex(9)	P50897	5434975	9.29329e+06	4.91579e+06	5.22614e+06	9.62293e+06	4854922
EEENGTNTADHVRNSSWAK-HexNAc(6)Hex(6)Fuc(1)NeuAc(3)	Q6GYQ0	NA	NA	1.02952e+06	NA	NA	3.34331e+06
HTNMNLTQLK-HexNAc(2)Hex(8)	Q15165	1.97659e+08	6.65959e+07	2.1638e+07	2.86401e+08	6.65959e+07	2.1638e+07
YIHQNYTKALAGK-HexNAc(2)Hex(8)	Q02809	3.22188e+07	NA	3.51028e+07	3.22188e+07	NA	3.51028e+07
VPLQSAHLYYNVTEK-HexNAc(2)Hex(8)	Q32P28	4.09583e+07	3.64788e+07	1.7502e+07	1.85149e+07	2.41485e+07	1.17644e+07
HTNMNLTQLK-HexNAc(2)Hex(9)	Q15165	2.22214e+07	1.98975e+07	9.24401e+06	3.21788e+07	2.5816e+07	1.37242e+07
NQTLAGEYFHK-HexNAc(2)Hex(1)	Q68CR1	NA	3.77964e+07	1.57019e+07	NA	2.66889e+07	1.37109e+07
NNHTASILDR-HexNAc(2)Hex(9)	P08962	4.72834e+07	5.83702e+07	3.18269e+07	3.56935e+07	45036757	2.25615e+07
EEDNR-HexNAc(5)Hex(3)	Q6V702	NA	3.44462e+06	NA	NA	8.59763e+06	NA
GNGSRPSSPEEVK-HexNAc(2)Hex(5)	Q05707	8.99495e+07	1.03289e+08	5.54984e+07	6.02057e+07	6.17506e+07	3.68439e+07
NR-HexNAc(6)Hex(3)Fuc(1)NeuAc(2)	Q4KMQ2	NA	NA	9.71727e+06	NA	NA	9.71727e+06
KDFLARNMTK-HexNAc(2)Hex(7)	Q6ZT98	4.60133e+06	NA	NA	1.69631e+07	NA	NA
AENQTAPGEVPALSNLRPPSR-HexNAc(7)Hex(7)Fuc(1)NeuAc(4)	P28300	1.80306e+06	NA	NA	1.95188e+06	NA	NA
NR-HexNAc(6)Hex(7)Fuc(1)NeuAc(4)	Q4KMQ2	NA	NA	4.92865e+06	NA	NA	4.92865e+06
DNDSLAAR-HexNAc(2)Hex(8)	P54886	NA	NA	7.71223e+06	NA	NA	1.5088e+06
TTLVDNNTWNNSHIALVGK-HexNAc(2)Hex(7)	Q8TCJ2	NA	NA	9.31348e+06	NA	NA	4.00127e+06
HNNDTQHIWESDSNEFSVIADPR-HexNAc(2)Hex(7)	P14625	5.93249e+08	2.81724e+08	528632849	469791846	5.34753e+08	2.39713e+08
RNWTITR-HexNAc(2)Hex(4)Fuc(1)	P19022	NA	897512	NA	NA	349704	NA
MNK-HexNAc(2)Hex(9)	P01024	4.65854e+06	5.75679e+06	NA	3.49087e+06	4.41928e+06	NA
LNLTTDPK-HexNAc(2)Hex(9)	Q92896	NA	1.26936e+07	NA	NA	1.03488e+07	NA
CGYCKNESGSR-HexNAc(2)Hex(8)	O95260	5.66808e+06	NA	NA	4.9315e+06	NA	NA
LIDNNKTEK-HexNAc(2)Hex(7)	P07602	1.10516e+07	1.27771e+07	NA	5.79231e+06	7.49926e+06	NA
EEENGTNTADHVRNSSWAK-HexNAc(4)Hex(5)Fuc(1)	Q6GYQ0	NA	NA	6.71871e+06	NA	NA	34933094
NISQVLEK-HexNAc(5)Hex(6)Fuc(1)NeuAc(3)	O14672	1.57616e+07	NA	NA	4.39576e+06	NA	NA
HPSCVNVSK-HexNAc(2)Hex(1)	Q9UHN6	NA	NA	2.76234e+06	NA	NA	7.75917e+06
EEDAGEWITVNQTTTANRYLKVSDLQQGK-HexNAc(2)Hex(1)Fuc(1)	P54296	NA	NA	2.19698e+07	NA	NA	1.1805e+06
GHVNITR-HexNAc(2)Hex(6)	P00734	2.56164e+06	3.77937e+06	1.14269e+06	3.38888e+06	3.96712e+06	1.09723e+06
TVLENSTSYEEAK-HexNAc(2)Hex(7)	Q13510	3.0282e+07	3.47122e+07	1.5576e+07	6.85574e+06	1.11093e+07	5.96498e+06
TEDLTEGNK-HexNAc(2)Hex(8)	Q9UBS9	NA	1.33088e+07	NA	NA	1.3675e+06	NA
EEEPVFTRQDSNR-HexNAc(4)Hex(5)Fuc(1)NeuAc(1)	Q9Y520	NA	15990049	NA	NA	2234634	NA
EEEELAYDWSDNNSNISAK-HexNAc(4)Hex(5)	Q9UPN3	NA	NA	3.07201e+06	NA	NA	8.60271e+06
DHLLLPAISHNK-HexNAc(2)Hex(1)	Q99941	NA	5.48442e+06	2.62867e+06	NA	1.67258e+06	345652
NEEYNK-HexNAc(2)Hex(8)	P02763	5.00044e+07	NA	NA	2.98174e+06	NA	NA
ALMNGSESR-HexNAc(2)Hex(1)	P35613	NA	12878346	NA	NA	1.14335e+07	NA
GPGIKPNQTSK-HexNAc(2)Hex(10)	P15586	1.85406e+07	NA	NA	2.04446e+07	NA	NA
AGAGDFMRYHYNGSLMDGTLFDSSYSR-HexNAc(7)Hex(6)Fuc(1)NeuAc(4)	Q96AY3	NA	NA	2.79221e+06	NA	NA	6.0407e+06
NVTVK-HexNAc(4)Hex(5)Fuc(1)NeuAc(1)	O75976	4.52322e+06	4.17004e+06	1.93444e+06	5.76188e+06	6.2528e+06	780043
GPGIKPNQTSK-HexNAc(2)Hex(6)	P15586	5.51457e+06	6.41719e+06	4.82015e+07	5.51457e+06	6.41719e+06	4.88145e+07
EEEELAYDWSDNNSNISAK-HexNAc(6)Hex(3)Fuc(1)NeuAc(1)	Q9UPN3	NA	NA	4.68357e+06	NA	NA	28751941
NISR-HexNAc(2)Hex(9)	Q96HE7	NA	162968301	NA	NA	1.58812e+08	NA
NCSAAPQPEPAAGLASYPELR-HexNAc(2)Hex(8)	O75718	1.49351e+07	1.23346e+07	NA	8.93282e+06	4.70664e+06	NA
VVVVDGKNESEYTVK-HexNAc(2)Hex(9)	P78536	NA	3.63734e+06	NA	NA	2.53281e+06	NA
HIWSLEISNKPNVSEPEEPK-HexNAc(5)Hex(6)Fuc(1)NeuAc(2)	O75976	16915408	19000402	1.00595e+07	4.1065e+06	1105891	2.47389e+06
KNASNMEYR-HexNAc(2)Hex(6)	Q9Y639	2.28967e+07	1.96346e+07	1.15512e+07	9.57423e+06	9.67189e+06	5.02707e+06
GHVNITR-HexNAc(2)Hex(8)	P00734	2.14354e+07	2.43927e+07	1.81217e+07	1.83759e+07	1.90518e+07	1.97921e+07
EPNFTLK-HexNAc(4)Hex(5)	Q92545	NA	4816930	NA	NA	2154599	NA
GNLSIHMQSDK-HexNAc(2)Hex(8)	Q86UP3	NA	347208	NA	NA	2.96938e+06	NA
EAGPEPPPPLSVYHNGTGTVR-HexNAc(2)	Q8WXD9	NA	NA	9.21623e+06	NA	NA	3.70947e+06
EEEPVFTRQDSNR-HexNAc(2)Hex(1)Fuc(1)	Q9Y520	NA	NA	6.11552e+06	NA	NA	6.31991e+06
ENK-HexNAc(4)Hex(5)NeuAc(2)	A0MZ66	NA	NA	3.13461e+06	NA	NA	1.80716e+06
YPGIFNSTTSDAFLQSK-HexNAc(2)Fuc(1)	Q16880	5.12262e+06	NA	NA	4.0684e+06	NA	NA
NNATVHEQVGGPSLTSDLQAQSK-HexNAc(2)Hex(8)	P04004	5.21777e+07	5.32052e+07	2.42071e+07	4.16072e+07	3.92769e+07	1.70119e+07
ANDTSYIR-HexNAc(2)Hex(9)	P20774	2.34724e+06	2.0204e+06	981649	1.04587e+08	1.67056e+08	6.56164e+07
VNWLAHNVSKDNR-HexNAc(2)Hex(6)	O00329	NA	NA	208297643	NA	NA	1.3953e+08
HNNDTQHIWESDSNEFSVIADPR-HexNAc(4)Hex(6)Fuc(1)NeuAc(1)	P14625	NA	NA	592733	NA	NA	871134
HNNDTQHIWESDSNEFSVIADPR-HexNAc(2)Hex(5)Fuc(1)	P14625	3.03911e+07	25370878	7.08553e+06	1.24928e+07	1429939400	9.1729e+06
GINESYK-HexNAc(2)Hex(8)	P50897	NA	NA	1.2267e+06	NA	NA	1.27596e+06
YHVLHINTTK-HexNAc(4)Hex(5)NeuAc(2)	Q7LGA3	1.12931e+07	1.45637e+07	7.77737e+06	1.34583e+07	1.62246e+07	7.86765e+06
VNGSSK-HexNAc(4)Hex(6)NeuAc(1)	P48436	NA	NA	1.51691e+06	NA	NA	79538540
EEDNR-HexNAc(4)Hex(5)NeuAc(1)	Q6V702	NA	915627	NA	NA	5.50086e+06	NA
TPEFHPNK-HexNAc(2)Hex(9)	Q96S16	3.58154e+07	3.33254e+07	1.5193e+07	3.38551e+07	3.39486e+07	1.35755e+07
SLSNSTAR-HexNAc(2)Hex(7)	P50454	2.01952e+08	2.83464e+08	9.92662e+07	2.08504e+08	2.41911e+08	9.80082e+07
YHYNGTFEDGK-HexNAc(2)Hex(7)	Q96AY3	5.53521e+07	6.29107e+07	2.4737e+07	4.04753e+07	4.27477e+07	2.17776e+07
KIWHCESNR-HexNAc(2)Hex(6)	O15550	NA	212845	NA	NA	1.69379e+06	NA
SGNDTYGAAHNLLVAHALAWR-HexNAc(2)Hex(1)	Q86Z14	NA	1.14237e+07	4.61664e+06	NA	1.82776e+07	9.73384e+06
PNQTSK-HexNAc(9)Hex(3)	P15586	NA	3.27569e+06	NA	NA	1.05264e+08	NA
PEINSTTHPGADLQENFCR-HexNAc(4)Hex(4)	P00734	NA	NA	1.54489e+07	NA	NA	1.23702e+06
EENK-HexNAc(4)Hex(6)	Q5SSJ5	NA	NA	16043997	NA	NA	5.43016e+06
QAVGGAGPPNPAINGSAPRDLFDMKPFEDALRVPPPPQSVSMAEQLR-HexNAc(3)Hex(6)	P29353	NA	NA	1.57805e+07	NA	NA	4.31079e+07
YETTNK-HexNAc(2)Hex(8)	P13473	4.60026e+06	4.95439e+06	NA	2.81996e+06	2.74258e+06	NA
NNSK-HexNAc(6)Hex(6)Fuc(1)NeuAc(3)	O14647	NA	NA	2.72279e+06	NA	NA	6.62776e+07
EEDNR-HexNAc(5)Hex(7)Fuc(1)NeuAc(1)	Q6V702	NA	997909	NA	NA	5501091	NA
EPNFTLK-HexNAc(5)Hex(4)	Q92545	NA	3.94566e+06	NA	NA	6.73048e+06	NA
NVTVK-HexNAc(7)Hex(8)Fuc(1)NeuAc(1)	O75976	1.49333e+07	NA	NA	7.99623e+06	NA	NA
NATR-HexNAc(6)Hex(7)Fuc(1)NeuAc(1)	P11279	NA	1.03176e+07	NA	NA	8.06525e+06	NA
GNVTQHVQGHR-HexNAc(6)Hex(7)Fuc(1)NeuAc(4)	Q15043	9.00006e+07	NA	NA	2.21818e+08	NA	NA
VPSENKDLYEYSWVQGPLHSNETDR-HexNAc(6)Hex(3)	Q92542	NA	2.4885e+07	NA	NA	2.77435e+07	NA
TILENNSGRSNSNPFNK-HexNAc(2)Hex(9)	O14647	NA	NA	5.02743e+06	NA	NA	523739768
EDPSPENR-HexNAc(4)Hex(3)NeuAc(1)	Q01826	9.75938e+06	6.68103e+06	NA	2.54584e+06	2.29552e+06	NA
YEQLQNETR-HexNAc(2)Hex(8)	P11117	4.37119e+07	4.92809e+07	1.93305e+07	3.01284e+07	2.80476e+07	1.37426e+07
EEEPVFTRQDSNRSEK-HexNAc(6)Hex(6)Fuc(1)	Q9Y520	NA	3.95366e+06	NA	NA	3.85782e+07	NA
SEDIKNVSR-HexNAc(2)Hex(8)	P78536	7.41173e+07	8.9566e+07	NA	1.67243e+07	1.94792e+07	NA
PVHHFMNTSTFTEYTVVDESSVAK-HexNAc(2)Hex(7)	P40394	NA	144566153	NA	NA	2.48369e+07	NA
KGTNFTHLVADR-HexNAc(2)Hex(10)	Q9C0C4	3.16911e+06	NA	NA	2.91966e+06	NA	NA
NK-HexNAc(6)Hex(7)NeuAc(2)	Q4KMQ2	NA	NA	3.24781e+06	NA	NA	2.18993e+06
VELNTSR-HexNAc(2)Hex(9)	P78357	8.28406e+07	8.69671e+07	3.86386e+07	4.8202e+07	4.43203e+07	2.2062e+07
DNHTHSDIQVK-HexNAc(2)Hex(1)	Q8IV08	NA	8.52393e+06	NA	NA	3.59498e+06	NA
NTSWDNAGFK-HexNAc(6)Hex(4)	P78536	1.20871e+07	NA	NA	3949184	NA	NA
GHTLTLNFTR-HexNAc(5)Hex(6)NeuAc(1)	P11279	4.8606e+07	4.50354e+07	25357649	4.49755e+07	5.36335e+07	1.37523e+07
YEQLQNETR-HexNAc(2)Hex(6)	P11117	NA	3.95698e+06	NA	NA	1.61698e+06	NA
KLNYTLSQGHR-HexNAc(5)Hex(6)NeuAc(3)	P15144	4.95488e+07	4.39735e+07	NA	8.49487e+07	7.78262e+07	NA
EENK-HexNAc(5)Hex(4)	Q5SSJ5	NA	1.10691e+07	NA	NA	6.2287e+06	NA
VPDSCCINVTVGCGINFNEKAIHK-HexNAc(2)Hex(8)	P08962	NA	45814873	NA	NA	1.65095e+07	NA
NQTNLER-HexNAc(2)Hex(8)	Q8NBJ4	2.07458e+07	2.23156e+07	NA	1.11024e+07	1.03482e+07	NA
GINESYK-HexNAc(5)Hex(6)NeuAc(3)	P50897	2.33144e+06	NA	NA	9.41946e+06	NA	NA
GNGSRPSSPEEVK-HexNAc(2)Hex(6)	Q05707	8.07186e+08	8.37866e+08	4.06491e+08	4.47257e+08	4.7166e+08	2.3838e+08
KPDPAEQQNVTQVAHSPQGYNTAR-HexNAc(4)Hex(5)Fuc(1)NeuAc(2)	O00461	6.55152e+07	122464707	7.16491e+07	2.73506e+07	1.78181e+06	3.61994e+06
EQEAAMEIQEPAANK-HexNAc(7)Hex(7)Fuc(1)NeuAc(4)	Q92576	NA	8.45568e+06	NA	NA	4.03186e+06	NA
HNLSLNDCFVK-HexNAc(6)Hex(4)	Q9UJU5	NA	NA	1864544	NA	NA	1.99179e+07
VQPFNVTQGK-HexNAc(5)Hex(6)NeuAc(3)	P13473	NA	1.4413e+07	NA	NA	3.03695e+07	NA
RRDPGAAVPGAANASAQQPR-HexNAc(2)Hex(7)	P28300	6.69409e+06	8.66974e+06	2.82108e+06	5.69049e+06	7.80326e+06	2.23394e+06
HERNYTK-HexNAc(2)Hex(7)	Q8TD23	NA	8.51956e+06	NA	NA	8.50972e+06	NA
LSDTTSQSNSTAK-HexNAc(5)Hex(8)	P07942	NA	NA	46787.3	NA	NA	4.5541e+06
HNNDTQHIWESDSNEFSVIADPR-HexNAc(2)Hex(1)	P14625	NA	NA	3.8221e+06	NA	NA	1.84421e+06
NNHTASILDR-HexNAc(5)Hex(6)Fuc(1)NeuAc(1)0	P08962	2.79332e+07	NA	NA	1.23672e+07	NA	NA
NVTWK-HexNAc(2)Hex(7)	P50454	NA	6.33704e+07	3.05225e+07	NA	6.94923e+07	3.43273e+07
TANHSAPSLENSVQPGK-HexNAc(2)Hex(8)	Q9UJ14	NA	2.66213e+06	4.93164e+06	NA	6.91493e+06	3.80906e+06
PNMSASCK-HexNAc(2)Hex(9)	P07602	NA	NA	545818	NA	NA	508678
LKCQENTSK-HexNAc(2)Hex(8)	Q96KX1	NA	861335	3.16705e+07	NA	345843	2.78467e+07
HNSTGCLR-HexNAc(2)Hex(8)	P10909	1.09926e+07	1.51497e+07	NA	1.47375e+07	1.86686e+07	NA
YNNRTYR-HexNAc(2)Hex(8)	Q8TC59	8.22971e+06	NA	NA	8.22971e+06	NA	NA
TYTYADTPDDFQLHNFSLPEEDTK-HexNAc(2)Hex(10)	P04062	4.75413e+06	NA	NA	7.02079e+06	NA	NA
EENK-HexNAc(2)Hex(3)Fuc(1)	Q5SSJ5	NA	NA	1070524	NA	NA	9.66172e+06
AASMNHTK-HexNAc(4)Hex(3)NeuAc(1)0	Q9UBV2	2.20984e+06	NA	NA	3933372	NA	NA

## Sheet: TableS6
Table S6 Differentially expressed intact N-glycopeptides in huh7cells and ZIKV infected host cells
glycopeptide	protein	L1	L2	L3	H1	H2	H3	pval	fc	up_down
NHSIFLADINQER-HexNAc(2)Hex(1)	P50897	1.98419e+07	2.34824e+07	1.68239e+07	1.04439e+07	6.26481e+06	5.612e+06	0.00780406	2.69473	up
LLNINPNK-HexNAc(9)Hex(6)	P11279	1.41693e+07	5.18842e+07	8.8461e+06	1.47067e+08	1.3234e+08	1.27015e+08	0.00664302	0.18429	down
HNNDTQHIWESDSNEFSVIADPR-HexNAc(6)Hex(4)	P14625	4.01222e+07	2.15111e+07	4.2136e+07	6.13684e+06	6010654	8.18693e+06	0.0499759	5.10313	up
YHTESLQNMSK-HexNAc(2)Hex(7)	O94992	703419	325950	928638	53219483	6.46837e+07	2.76404e+07	0.0485206	0.0134531	down
HTNMNLTQLK-HexNAc(6)Hex(9)	Q15165	358417	1.62958e+06	1.58461e+06	3.61224e+07	4.90025e+07	2.18255e+07	0.047801	0.0334043	down
EMEAELNSTMK-HexNAc(3)Hex(6)	Q56P03	3.66786e+07	2.99176e+06	1.29472e+06	8.39731e+07	1.0047e+08	6.8538e+07	0.00978945	0.161929	down
ENYSHHTQDDR-HexNAc(2)Hex(2)	Q92804	3.56891e+07	3.97786e+07	1.99539e+07	3.09746e+06	5.53479e+06	3.66981e+06	0.0426309	7.75655	up
LANNTHQHVFDDLR-HexNAc(5)Hex(6)Fuc(1)NeuAc(3)	Q99523	3.43526e+07	4.24354e+07	25572934	706638	801810	110025	0.0202126	63.2453	up
NNSNNFDLNR-HexNAc(3)Hex(5)NeuAc(1)	O75976	4.35267e+07	3.81531e+07	2.69075e+07	4.59845e+06	4.83646e+06	3.54691e+06	0.022207	8.36456	up
YHTESLQNMSK-HexNAc(2)Hex(8)	O94992	4.13353e+06	4.49485e+07	1.13461e+06	1.57876e+08	1.12633e+08	7.07578e+07	0.0406201	0.147148	down
ESPWNGSVGEK-HexNAc(2)Hex(8)	Q15751	5.2952e+07	4.51465e+07	2.78093e+07	744643	1.61801e+07	8.66366e+06	0.0262688	4.92051	up
EEEPVFTRQDSNRSEK-HexNAc(6)Hex(3)Fuc(1)NeuAc(1)	Q9Y520	9.30205e+07	9.63292e+07	4.70029e+07	8.49046e+06	1.25769e+07	1.95304e+07	0.0497058	5.82181	up
NDTLQEAK-HexNAc(2)Hex(9)	Q92896	1.61028e+07	1.79659e+07	1.16998e+07	3.68379e+06	4.32751e+06	1.11075e+07	0.0451644	2.39391	up
ANTTQPGIVEGGQVLK-HexNAc(4)Hex(5)Fuc(1)NeuAc(1)	P06756	1.05798e+08	95955927	5.27798e+07	1.42829e+07	1.60619e+07	7.05596e+06	0.0436509	6.80556	up
DLGPTLANSTHHNVR-HexNAc(4)Hex(5)Fuc(1)NeuAc(2)	P04062	3.12426e+07	3.61177e+07	1.87156e+07	3.92836e+06	6.8091e+06	2.21886e+06	0.0354235	6.64355	up
NNHTASILDR-HexNAc(7)Hex(7)	P08962	7.40577e+07	1.12059e+08	6.89628e+07	3.96674e+07	2.1877e+07	7.45918e+06	0.0245653	3.69662	up
NNHTASILDR-HexNAc(5)Hex(6)Fuc(1)NeuAc(1)	P08962	2.81086e+07	2.99608e+07	1.72452e+07	3.07727e+06	3.1013e+06	1.03301e+07	0.0200281	4.56213	up
KNSTTNYR-HexNAc(2)Hex(8)	A0JNW5	1.16004e+06	1.14911e+06	1.31389e+07	2.2705e+07	2.75495e+07	1.61167e+07	0.0323246	0.232752	down
NNHTASILDR-HexNAc(5)Hex(6)Fuc(1)NeuAc(3)	P08962	731179854	817109602	419237476	1.78881e+08	199116015	1.02377e+08	0.0477444	4.09582	up
VASVININPNTTHSTGSCR-HexNAc(6)Hex(7)Fuc(1)NeuAc(3)	P13473	1.91543e+07	3.13208e+07	1.06281e+07	7.43392e+07	6.07621e+07	4.52771e+07	0.0219724	0.33875	down
NNSNNFDLNR-HexNAc(4)Hex(5)NeuAc(2)	O75976	5.60531e+07	6.33195e+07	5.35796e+07	2.15378e+07	1.08094e+07	6.03823e+06	0.00231546	4.50568	up
HIWSLEISNKPNVSEPEEPK-HexNAc(5)Hex(6)Fuc(1)NeuAc(2)	O75976	16915408	19000402	1.00595e+07	4.1065e+06	1105891	2.47389e+06	0.0322222	5.98148	up
KPDPAEQQNVTQVAHSPQGYNTAR-HexNAc(4)Hex(5)Fuc(1)NeuAc(2)	O00461	6.55152e+07	122464707	7.16491e+07	2.73506e+07	1.78181e+06	3.61994e+06	0.0358345	7.92704	up
